# Supplementary material for: Identification of fibrillogenic regions in human triosephosphate isomerase
Source: PeerJ. 2016 Feb 4;4:e1676. doi: 10.7717/peerj.1676 (PMC4748702; doi:10.7717/peerj.1676)
Supplement: Data S1 [file peerj-04-1676-s001.xlsx]

## Sheet: Figure 1
AGGREGATION KINECTS (HsTPI)
Time (hrs)	HsTPI					HsTPI (3.2 M urea)
	ThT fluorescence					ThT fluorescence
	1 repeat	2 repeat	3 repeat	mean	stdev	1 repeat	2 repeat	3 repeat	mean	stdev
0	4	6	6	5.33333	1.1547	5	6	5	5.33333	0.57735
5	25	45	15	28.3333	15.2753	9	8	9	8.66667	0.57735
12	78	36	23	45.6667	28.746	20	21	22	21	1
24	66	85	71	74	9.84886	90	78	80	82.6667	6.4291
48	95	88	123	102	18.5203	191	176	180	182.333	7.76745
72	65	129	98	97.3333	32.0052	345	335	339	339.667	5.03322
96	102	133	70	101.667	31.5013	456	521	412	463	54.8361
120	55	136	102	97.6667	40.6735	553	589	506	549.333	41.6213
144	83	135	92	103.333	27.7909	596	621	588	601.667	17.2143
168	94	109	92	98.3333	9.29157	652	596	695	647.667	49.6421
Time (hrs)	HsTPI					HsTPI (3.2 M urea)
	Turibity (absorbance 405 nm)					Turibity (absorbance 405 nm)
	1 repeat	2 repeat	3 repeat	mean	stdev	1 repeat	2 repeat	3 repeat	mean	stdev
0	0	0	0	0	0	0	0	0	0	0
5	0.0464	0.0321	0.0305	0.0363333	0.00875462	0.0138	0.0103	0.0139	0.0126667	0.0020502
24	0.1039	0.106	0.1235	0.111133	0.0107612	0.0217	0.0316	0.0444	0.0325667	0.0113808
32	0.1431	0.1666	0.1682	0.1593	0.0140524	0.0338	0.0371	0.0423	0.0377333	0.00428525
48	0.2205	0.2266	0.2295	0.225533	0.00459384	0.0465	0.0515	0.0578	0.0519333	0.00566245
72	0.2244	0.2308	0.2392	0.231467	0.00742249	0.056	0.0576	0.0626	0.0587333	0.00344287
83	0.2306	0.2336	0.2301	0.231433	0.00189297	0.0702	0.0647	0.0743	0.0697333	0.00481698
96	0.2417	0.2455	0.2284	0.238533	0.00897905	0.0744	0.0719	0.0773	0.0745333	0.00270247
168	0.2515	0.2205	0.2509	0.240967	0.0177272	0.109	0.0649	0.0897	0.0878667	0.0221071

## Sheet: Figure 2
ATR-FTIR
Raw data					Raw data (Water-vapor spectrum subtracted)					Raw data (Water-vapor spectrum subtracted) Normalized at 1630 [1/cm]					Raw data (Water-vapor spectrum subtracted) Normalized at 1630 [1/cm]					Raw data (Water-vapor spectrum subtracted) Normalized at 1630 [1/cm]---Second Derivative
	HsTPI	HsTPI (3.2 M urea)	HsTPI salted-out			HsTPI	HsTPI (3.2 M urea)	HsTPI salted-out			HsTPI	HsTPI (3.2 M urea)	HsTPI salted-out			HsTPI	HsTPI (3.2 M urea)	HsTPI salted-out			HsTPI	HsTPI (3.2 M urea)	HsTPI salted-out
Wavenumbers [1/cm]	Transmittance				Wavenumbers [1/cm]	Transmittance				Wavenumbers [1/cm]	Transmittance				Wavenumbers [1/cm]	Absorbance				Wavenumbers [1/cm]
1850	0.97197	0.99723	0.96678		1850	0.98072	1.0071	0.96368		1850	0.72744	0.94589	0.62667		1850	0.138203	0.0241594	0.202961		1700	1.00007	1.00019	0.999987
1849.75	0.9737	0.99716	0.96555		1849.75	0.98165	1.0068	0.96457		1849.75	0.73885	0.94183	0.634		1849.75	0.131444	0.0260275	0.197911		1699.75	1.00007	1.00019	1
1849.5	0.97418	0.99825	0.96641		1849.5	0.98137	1.0078	0.96386		1849.5	0.73541	0.93381	0.62816		1849.5	0.13347	0.0297415	0.20193		1699.5	1.00007	1.00019	1.00002
1849.25	0.97277	0.99913	0.96753		1849.25	0.97942	1.0086	0.96239		1849.25	0.71188	0.92617	0.61618		1849.25	0.147593	0.0333093	0.210292		1699.25	1.00008	1.00019	1.00003										SALTIM.SP
1849	0.97174	0.99968	0.9667		1849	0.97788	1.0087	0.96198		1849	0.69384	0.92197	0.61287		1849	0.158741	0.0352832	0.212632		1699	1.00008	1.00018	1.00005									Wavenumbers [1/cm]	Transmittance
1848.75	0.9734	1.0002	0.96514		1848.75	0.97878	1.0084	0.96371		1848.75	0.70439	0.92229	0.62695		1848.75	0.152187	0.0351325	0.202767		1698.75	1.00009	1.00018	1.00006									2000	0.97438
1848.5	0.9767	1.0007	0.96459		1848.5	0.98094	1.0081	0.96518		1848.5	0.73017	0.92624	0.63913		1848.5	0.136576	0.0332765	0.194411		1698.5	1.00009	1.00018	1.00008									1999.75	0.9738
1848.25	0.97977	1.0009	0.96401		1848.25	0.98261	1.0077	0.96482		1848.25	0.75074	0.9314	0.63607		1848.25	0.12451	0.0308638	0.196495		1698.25	1.00009	1.00017	1.00009									1999.5	0.97369
1848	0.98139	1.0007	0.96228		1848	0.98296	1.007	0.96394		1848	0.75513	0.93512	0.62885		1848	0.121978	0.0291327	0.201453		1698	1.0001	1.00017	1.00011									1999.25	0.9741
1847.75	0.98145	1	0.96077		1847.75	0.98214	1.0055	0.96375		1847.75	0.74496	0.93562	0.62728		1847.75	0.127867	0.0289005	0.202539		1697.75	1.0001	1.00017	1.00012									1999	0.9746
1847.5	0.98128	0.99906	0.96368		1847.5	0.9815	1.0034	0.96389		1847.5	0.737	0.93338	0.62841		1847.5	0.132533	0.0299415	0.201757		1697.5	1.0001	1.00016	1.00014									1998.75	0.97438
1847.25	0.9819	0.99806	0.96408		1847.25	0.98188	1.001	0.96406		1847.25	0.74172	0.9304	0.6298		1847.25	0.12976	0.0313303	0.200797		1697.25	1.00011	1.00016	1.00015									1998.5	0.97306
1847	0.98304	0.9971	0.96468		1847	0.98285	0.99869	0.9645		1847	0.75382	0.92801	0.63343		1847	0.122732	0.0324473	0.198301		1697	1.00011	1.00016	1.00016									1998.25	0.97185
1846.75	0.984	0.99623	0.96541		1846.75	0.9836	0.99694	0.96502		1846.75	0.76321	0.92692	0.6378		1846.75	0.117356	0.0329577	0.195315		1696.75	1.00011	1.00015	1.00017									1998	0.97196
1846.5	0.98405	0.99556	0.96545		1846.5	0.98338	0.99578	0.96478		1846.5	0.76036	0.92678	0.63578		1846.5	0.118981	0.0330233	0.196693		1696.5	1.00011	1.00015	1.00019									1997.75	0.97278
1846.25	0.98344	0.99518	0.96498		1846.25	0.98247	0.99516	0.96402		1846.25	0.74901	0.92696	0.62949		1846.25	0.125512	0.032939	0.201011		1696.25	1.00012	1.00014	1.0002									1997.5	0.97334
1846	0.98342	0.99505	0.96536		1846	0.98217	0.99486	0.96413		1846	0.74527	0.92652	0.63036		1846	0.127686	0.0331452	0.200411		1696	1.00012	1.00014	1.00021									1997.25	0.97351
1845.75	0.98422	0.99506	0.96646		1845.75	0.98275	0.99466	0.96501		1845.75	0.75247	0.92499	0.63772		1845.75	0.123511	0.033863	0.19537		1695.75	1.00012	1.00014	1.00022									1997	0.97349
1845.5	0.98482	0.99501	0.96667		1845.5	0.98325	0.99433	0.96512		1845.5	0.75876	0.92288	0.63863		1845.5	0.119896	0.0348548	0.194751		1695.5	1.00012	1.00013	1.00023									1996.75	0.97356
1845.25	0.98467	0.99485	0.96582		1845.25	0.98319	0.99386	0.96437		1845.25	0.75801	0.92022	0.63237		1845.25	0.120325	0.0361083	0.199029		1695.25	1.00012	1.00013	1.00023									1996.5	0.97387
1845	0.98391	0.99474	0.96523		1845	0.98278	0.99347	0.96413		1845	0.75293	0.91703	0.63033		1845	0.123245	0.0376165	0.200432		1695	1.00012	1.00012	1.00024									1996.25	0.97397
1844.75	0.98262	0.9947	0.96467		1844.75	0.98211	0.99321	0.96417		1844.75	0.74456	0.91454	0.63073		1844.75	0.1281	0.0387973	0.200157		1694.75	1.00012	1.00012	1.00025									1996	0.97372
1844.5	0.98067	0.99462	0.96296		1844.5	0.98104	0.99303	0.96333		1844.5	0.73143	0.91457	0.62378		1844.5	0.135827	0.038783	0.204969		1694.5	1.00012	1.00011	1.00025									1995.75	0.9736
1844.25	0.97889	0.9946	0.96127		1844.25	0.98032	0.99311	0.96267		1844.25	0.72262	0.91777	0.61843		1844.25	0.14109	0.0372661	0.208709		1694.25	1.00012	1.00011	1.00026									1995.5	0.97388
1844	0.97879	0.9949	0.96222		1844	0.98125	0.99376	0.96464		1844	0.73392	0.92323	0.6346		1844	0.134351	0.0346901	0.1975		1694	1.00012	1.0001	1.00026									1995.25	0.97425
1843.75	0.9796	0.99535	0.96428		1843.75	0.98269	0.99484	0.96732		1843.75	0.75176	0.92914	0.65721		1843.75	0.123921	0.0319188	0.182296		1693.75	1.00012	1.0001	1.00026									1995	0.97447
1843.5	0.97936	0.99555	0.96384		1843.5	0.98237	0.99593	0.96681		1843.5	0.7478	0.93356	0.65287		1843.5	0.126215	0.0298578	0.185173		1693.5	1.00011	1.0001	1.00026									1994.75	0.97457
1843.25	0.97903	0.99545	0.96221		1843.25	0.98138	0.9969	0.96452		1843.25	0.73555	0.93505	0.63361		1843.25	0.133388	0.0291652	0.198178		1693.25	1.00011	1.00009	1.00026									1994.5	0.97452
1843	0.98006	0.99534	0.96183		1843	0.98155	0.99784	0.9633		1843	0.73766	0.93344	0.62352		1843	0.132144	0.0299136	0.20515		1693	1.00011	1.00009	1.00026									1994.25	0.97422
1842.75	0.98186	0.99528	0.96294		1842.75	0.98256	0.99841	0.96362		1842.75	0.75018	0.93078	0.62619		1842.75	0.124835	0.031153	0.203294		1692.75	1.00011	1.00008	1.00026									1994	0.97392
1842.5	0.98324	0.99515	0.96472		1842.5	0.98335	0.99822	0.96483		1842.5	0.76003	0.92943	0.63616		1842.5	0.119169	0.0317833	0.196434		1692.5	1.0001	1.00008	1.00026									1993.75	0.974
1842.25	0.98359	0.99514	0.96586		1842.25	0.9834	0.99753	0.96567		1842.25	0.7607	0.92981	0.64321		1842.25	0.118787	0.0316058	0.191647		1692.25	1.0001	1.00008	1.00025									1993.5	0.97415
1842	0.98296	0.99539	0.96555		1842	0.98271	0.9969	0.9653		1842	0.75199	0.93147	0.64008		1842	0.123788	0.0308311	0.193766		1692	1.0001	1.00007	1.00025									1993.25	0.97375
1841.75	0.98226	0.9956	0.96452		1841.75	0.98186	0.99631	0.96412		1841.75	0.74145	0.93583	0.63031		1841.75	0.129918	0.028803	0.200446		1691.75	1.00009	1.00007	1.00024									1993	0.97241
1841.5	0.98224	0.99557	0.96385		1841.5	0.98144	0.99568	0.96306		1841.5	0.73622	0.94261	0.6216		1841.5	0.132992	0.025668	0.206489		1691.5	1.00009	1.00007	1.00023									1992.75	0.97024
1841.25	0.98244	0.99551	0.96391		1841.25	0.98114	0.99531	0.96263		1841.25	0.73264	0.94779	0.61813		1841.25	0.135109	0.0232879	0.20892		1691.25	1.00008	1.00006	1.00023									1992.5	0.96825
1841	0.98229	0.99563	0.96443		1841	0.98072	0.99538	0.96289		1841	0.72755	0.94809	0.62019		1841	0.138137	0.0231504	0.207475		1691	1.00007	1.00006	1.00022									1992.25	0.9676
1840.75	0.98196	0.99584	0.96459		1840.75	0.98057	0.99544	0.96322		1840.75	0.72566	0.94569	0.62292		1840.75	0.139267	0.0242512	0.205568		1690.75	1.00007	1.00006	1.00021									1992	0.9678
1840.5	0.98173	0.99594	0.96405		1840.5	0.98091	0.99513	0.96325		1840.5	0.72978	0.94438	0.62311		1840.5	0.136808	0.0248532	0.205435		1690.5	1.00006	1.00005	1.0002									1991.75	0.96777
1840.25	0.98179	0.99585	0.96356		1840.25	0.98155	0.99453	0.96332		1840.25	0.73758	0.94636	0.62374		1840.25	0.132191	0.0239436	0.204996		1690.25	1.00006	1.00005	1.00018									1991.5	0.96826
1840	0.98223	0.99556	0.96373		1840	0.98225	0.99397	0.96375		1840	0.74633	0.95143	0.62726		1840	0.127069	0.0216232	0.202552		1690	1.00005	1.00005	1.00017									1991.25	0.97005
1839.75	0.98291	0.99517	0.96436		1839.75	0.98294	0.99376	0.96439		1839.75	0.75495	0.95742	0.63251		1839.75	0.122082	0.0188975	0.198933		1689.75	1.00004	1.00005	1.00016									1991	0.97152
1839.5	0.98346	0.99487	0.96491		1839.5	0.98343	0.99404	0.96488		1839.5	0.76107	0.9629	0.6366		1839.5	0.118575	0.0164188	0.196133		1689.5	1.00003	1.00004	1.00014									1990.75	0.97175
1839.25	0.98349	0.99485	0.96494		1839.25	0.98353	0.9946	0.96497		1839.25	0.76228	0.96756	0.63736		1839.25	0.117885	0.0143221	0.195615		1689.25	1.00002	1.00004	1.00013									1990.5	0.9715
1839	0.98317	0.99512	0.96452		1839	0.9834	0.99514	0.96474		1839	0.76066	0.97353	0.63546		1839	0.118809	0.0116507	0.196912		1689	1.00002	1.00004	1.00011									1990.25	0.97156
1838.75	0.98296	0.99535	0.96414		1838.75	0.98335	0.99538	0.96452		1838.75	0.76004	0.98341	0.63356		1838.75	0.119164	0.00726538	0.198212		1688.75	1.00001	1.00004	1.00009									1990	0.97182
1838.5	0.98277	0.99538	0.9639		1838.5	0.98325	0.99535	0.96437		1838.5	0.75881	0.99709	0.63239		1838.5	0.119867	0.00126564	0.199015		1688.5	0.999997	1.00004	1.00008									1989.75	0.97211
1838.25	0.98207	0.99533	0.96355		1838.25	0.98276	0.99536	0.96422		1838.25	0.7526	1.0106	0.63112		1838.25	0.123436	-0.00457929	0.199888		1688.25	0.999988	1.00003	1.00006									1989.5	0.97259
1838	0.98028	0.99531	0.96248		1838	0.98142	0.99555	0.96361		1838	0.73605	1.0185	0.62606		1838	0.133093	-0.00796103	0.203384		1688	0.999979	1.00003	1.00004									1989.25	0.973
1837.75	0.97714	0.99536	0.96024		1837.75	0.97907	0.99575	0.96214		1837.75	0.70774	1.0164	0.61415		1837.75	0.150126	-0.00706466	0.211726		1687.75	0.99997	1.00003	1.00002									1989	0.97276
1837.5	0.97459	0.99548	0.95828		1837.5	0.97756	0.99597	0.96121		1837.5	0.69018	1.003	0.60664		1837.5	0.161038	-0.00130093	0.217069		1687.5	0.99996	1.00003	1									1988.75	0.9718
1837.25	0.97519	0.9957	0.95868		1837.25	0.97934	0.9964	0.96276		1837.25	0.7109	0.98103	0.61917		1837.25	0.148191	0.00831771	0.20819		1687.25	0.999951	1.00003	0.999984									1988.5	0.97079
1837	0.97732	0.99601	0.96028		1837	0.983	0.99718	0.96586		1837	0.7556	0.9612	0.64484		1837	0.121708	0.0171862	0.190548		1687	0.999942	1.00002	0.999965									1988.25	0.97048
1836.75	0.97455	0.9964	0.95819		1836.75	0.98232	0.99837	0.96583		1836.75	0.74715	0.96024	0.64452		1836.75	0.126592	0.0176202	0.190764		1686.75	0.999933	1.00002	0.999946									1988	0.97149
1836.5	0.96776	0.99681	0.95341		1836.5	0.97781	0.99985	0.96332		1836.5	0.69302	0.97529	0.6237		1836.5	0.159254	0.0108662	0.205024		1686.5	0.999924	1.00002	0.999927									1987.75	0.97267
1836.25	0.96163	0.99711	0.94967		1836.25	0.97343	1.0014	0.96132		1836.25	0.64402	0.9877	0.60755		1836.25	0.191101	0.00537495	0.216418		1686.25	0.999915	1.00002	0.999908									1987.5	0.97198
1836	0.95989	0.99717	0.94919		1836	0.97222	1.003	0.96137		1836	0.63099	0.99549	0.60797		1836	0.199978	0.0019631	0.216118		1686	0.999906	1.00002	0.999889									1987.25	0.97061
1835.75	0.96572	0.99699	0.95328		1835.75	0.97713	1.0049	0.96454		1835.75	0.68517	1.0031	0.6338		1835.75	0.164202	-0.00134423	0.198048		1685.75	0.999898	1.00002	0.99987									1987	0.97156
1835.5	0.97261	0.99686	0.95666		1835.5	0.98232	1.0072	0.96621		1835.5	0.74719	1.0096	0.64775		1835.5	0.126569	-0.00414934	0.188593		1685.5	0.999889	1.00001	0.999851									1986.75	0.97383
1835.25	0.97588	0.99714	0.95698		1835.25	0.98391	1.0094	0.96486		1835.25	0.76712	1.0126	0.6364		1835.25	0.115137	-0.00543792	0.19627		1685.25	0.999882	1.00001	0.999833									1986.5	0.97417
1835	0.97681	0.99784	0.95802		1835	0.98338	1.0106	0.96445		1835	0.76042	1.0095	0.63306		1835	0.118946	-0.00410632	0.198555		1685	0.999874	1.00001	0.999815									1986.25	0.97331
1834.75	0.97723	0.99857	0.96125		1834.75	0.9825	1.0104	0.96644		1834.75	0.74943	1.0001	0.64969		1834.75	0.125269	-4.34273e-05	0.187294		1684.75	0.999867	1.00001	0.999798									1986	0.97384
1834.5	0.97802	0.99901	0.96339		1834.5	0.98222	1.009	0.96752		1834.5	0.74584	0.98671	0.65892		1834.5	0.127354	0.00581047	0.181167		1684.5	0.99986	1.00001	0.999782									1985.75	0.97491
1834.25	0.97927	0.99903	0.96277		1834.25	0.98258	1.0073	0.96602		1834.25	0.75034	0.97276	0.64614		1834.25	0.124742	0.0119943	0.189673		1684.25	0.999854	1.00001	0.999766									1985.5	0.97458
1834	0.97968	0.99867	0.9619		1834	0.98216	1.0054	0.96435		1834	0.74517	0.95945	0.63216		1834	0.127745	0.0179777	0.199173		1684	0.999848	1	0.999751									1985.25	0.97353
1833.75	0.97901	0.99804	0.96238		1833.75	0.98077	1.0034	0.9641		1833.75	0.72807	0.94761	0.63015		1833.75	0.137827	0.0233704	0.200556		1683.75	0.999842	1	0.999736									1985	0.97323
1833.5	0.97928	0.99742	0.963		1833.5	0.98056	1.0017	0.96426		1833.5	0.72554	0.93861	0.63141		1833.5	0.139339	0.0275148	0.199689		1683.5	0.999838	1	0.999723									1984.75	0.97372
1833.25	0.98041	0.99698	0.96258		1833.25	0.98162	1.0003	0.96376		1833.25	0.73851	0.93341	0.62736		1833.25	0.131644	0.0299276	0.202483		1683.25	0.999833	0.999999	0.999711									1984.5	0.97457
1833	0.9792	0.99671	0.96087		1833	0.98088	0.99924	0.96252		1833	0.7294	0.9317	0.61723		1833	0.137034	0.0307239	0.209553		1683	0.99983	0.999997	0.999699									1984.25	0.97528
1832.75	0.97532	0.99657	0.95839		1832.75	0.97789	0.99835	0.96093		1832.75	0.694	0.93184	0.60441		1832.75	0.158641	0.0306587	0.218668		1682.75	0.999826	0.999996	0.999689									1984	0.97548
1832.5	0.9719	0.99653	0.95583		1832.5	0.97542	0.99783	0.9593		1832.5	0.66588	0.93121	0.59159		1832.5	0.176604	0.0309524	0.227979		1682.5	0.999824	0.999995	0.99968									1983.75	0.97541
1832.25	0.9708	0.99655	0.95436		1832.25	0.97518	0.99778	0.95867		1832.25	0.66321	0.92904	0.58672		1832.25	0.178349	0.0319656	0.231569		1682.25	0.999822	0.999994	0.999671									1983.5	0.97536
1832	0.97237	0.99657	0.95689		1832	0.97765	0.99828	0.96208		1832	0.6912	0.92755	0.61365		1832	0.160396	0.0326627	0.212079		1682	0.999821	0.999993	0.999664									1983.25	0.97503
1831.75	0.97539	0.9965	0.96179		1831.75	0.98133	0.99913	0.96765		1831.75	0.7349	0.92704	0.66006		1831.75	0.133772	0.0329015	0.180417		1681.75	0.99982	0.999992	0.999658									1983	0.97444
1831.5	0.97716	0.99622	0.96192		1831.5	0.98302	0.99984	0.96769		1831.5	0.75584	0.92596	0.66039		1831.5	0.12157	0.0334078	0.1802		1681.5	0.999819	0.999991	0.999653									1982.75	0.97464
1831.25	0.97761	0.9958	0.95939		1831.25	0.98259	1.0003	0.96427		1831.25	0.7505	0.9258	0.63157		1831.25	0.124649	0.0334828	0.199579		1681.25	0.99982	0.999991	0.999649									1982.5	0.97566
1831	0.97823	0.99559	0.95953		1831	0.98195	1.001	0.96317		1831	0.74251	0.92976	0.6225		1831	0.129298	0.0316291	0.205861		1681	0.999821	0.99999	0.999647									1982.25	0.97563
1830.75	0.97928	0.9958	0.96157		1830.75	0.98189	1.0019	0.96414		1830.75	0.74188	0.93581	0.63049		1830.75	0.129666	0.0288123	0.200322		1680.75	0.999823	0.99999	0.999646									1982	0.97421
1830.5	0.98017	0.99617	0.96266		1830.5	0.98226	1.0021	0.96471		1830.5	0.74635	0.9384	0.63521		1830.5	0.127057	0.027612	0.197083		1680.5	0.999825	0.999989	0.999645									1981.75	0.97371
1830.25	0.98016	0.99651	0.96247		1830.25	0.98218	1.0016	0.96445		1830.25	0.74538	0.93704	0.63298		1830.25	0.127622	0.0282419	0.19861		1680.25	0.999828	0.999989	0.999646									1981.5	0.97469
1830	0.97901	0.99687	0.96185		1830	0.98108	1.0007	0.96388		1830	0.73183	0.93567	0.62832		1830	0.13559	0.0288773	0.201819		1680	0.999831	0.999989	0.999649									1981.25	0.97517
1829.75	0.97782	0.99717	0.96144		1829.75	0.9799	0.99983	0.96348		1829.75	0.7176	0.93477	0.62505		1829.75	0.144118	0.0292952	0.204085		1679.75	0.999835	0.999989	0.999652									1981	0.97472
1829.5	0.97807	0.99734	0.96176		1829.5	0.98005	0.99947	0.96371		1829.5	0.71941	0.93311	0.62691		1829.5	0.143024	0.0300672	0.202795		1679.5	0.999839	0.999989	0.999657									1980.75	0.97481
1829.25	0.97935	0.99736	0.9623		1829.25	0.98099	0.99941	0.96392		1829.25	0.7308	0.93296	0.62862		1829.25	0.136201	0.030137	0.201612		1679.25	0.999844	0.999989	0.999663									1980.5	0.97573
1829	0.98052	0.99725	0.96241		1829	0.98155	0.99936	0.96342		1829	0.73764	0.93625	0.62456		1829	0.132156	0.0286082	0.204426		1679	0.99985	0.999989	0.99967									1980.25	0.9766
1828.75	0.9813	0.99712	0.96273		1828.75	0.9817	0.99924	0.96313		1828.75	0.73953	0.93908	0.62214		1828.75	0.131044	0.0272974	0.206112		1678.75	0.999856	0.999989	0.999678									1980	0.97683
1828.5	0.98181	0.99705	0.96383		1828.5	0.98174	0.99907	0.96377		1828.5	0.74001	0.93871	0.6274		1828.5	0.130762	0.0274686	0.202455		1678.5	0.999863	0.999989	0.999688									1979.75	0.97632
1828.25	0.98213	0.99673	0.96458		1828.25	0.98172	0.9984	0.96418		1828.25	0.73966	0.93784	0.63075		1828.25	0.130968	0.0278712	0.200143		1678.25	0.99987	0.999989	0.999698									1979.5	0.97567
1828	0.98233	0.996	0.96423		1828	0.98161	0.99705	0.96352		1828	0.73831	0.93955	0.62534		1828	0.131761	0.0270801	0.203884		1678	0.999877	0.99999	0.99971									1979.25	0.97567
1827.75	0.98207	0.99521	0.96393		1827.75	0.98108	0.99561	0.96295		1827.75	0.73185	0.94238	0.6207		1827.75	0.135578	0.0257739	0.207118		1677.75	0.999885	0.99999	0.999723									1979	0.97588
1827.5	0.9815	0.99469	0.96457		1827.5	0.98033	0.99463	0.96342		1827.5	0.72275	0.94374	0.62453		1827.5	0.141012	0.0251476	0.204447		1677.5	0.999893	0.99999	0.999736									1978.75	0.97547
1827.25	0.98183	0.99437	0.96548		1827.25	0.98069	0.99396	0.96436		1827.25	0.72718	0.94243	0.63229		1827.25	0.138358	0.0257509	0.199084		1677.25	0.999901	0.99999	0.99975									1978.5	0.97509
1827	0.98344	0.99409	0.966		1827	0.98245	0.99336	0.96502		1827	0.74871	0.93853	0.63776		1827	0.125686	0.0275518	0.195343		1677	0.999909	0.99999	0.999765									1978.25	0.97556
1826.75	0.9848	0.99385	0.9661		1826.75	0.98374	0.99284	0.96505		1826.75	0.76494	0.93339	0.63801		1826.75	0.116373	0.0299369	0.195173		1676.75	0.999917	0.99999	0.999781									1978	0.97638
1826.5	0.985	0.99367	0.966		1826.5	0.98356	0.99249	0.96458		1826.5	0.76272	0.92932	0.6341		1826.5	0.117635	0.0318347	0.197842		1676.5	0.999926	0.99999	0.999797									1977.75	0.97667
1826.25	0.98477	0.99356	0.96607		1826.25	0.98288	0.99241	0.96421		1826.25	0.75411	0.92906	0.63107		1826.25	0.122565	0.0319562	0.199922		1676.25	0.999935	0.99999	0.999813									1977.5	0.97616
1826	0.98457	0.99353	0.96625		1826	0.98247	0.99252	0.96418		1826	0.749	0.93269	0.63082		1826	0.125518	0.0302627	0.200095		1676	0.999943	0.99999	0.99983									1977.25	0.9751
1825.75	0.98413	0.99361	0.96593		1825.75	0.98217	0.99253	0.96401		1825.75	0.7453	0.93576	0.62938		1825.75	0.127669	0.0288355	0.201087		1675.75	0.999952	0.99999	0.999847									1977	0.97427
1825.5	0.98359	0.99373	0.96521		1825.5	0.9821	0.99227	0.96374		1825.5	0.74438	0.9361	0.62715		1825.5	0.128205	0.0286778	0.202629		1675.5	0.99996	0.999989	0.999864									1976.75	0.9743
1825.25	0.98361	0.99371	0.96497		1825.25	0.98266	0.99181	0.96404		1825.25	0.75133	0.93543	0.62959		1825.25	0.124169	0.0289887	0.200942		1675.25	0.999969	0.999989	0.999881									1976.5	0.97499
1825	0.98367	0.99353	0.96509		1825	0.98327	0.99141	0.9647		1825	0.75908	0.93527	0.63507		1825	0.119712	0.029063	0.197178		1675	0.999977	0.999988	0.999898									1976.25	0.97569
1824.75	0.98259	0.99337	0.96462		1824.75	0.9829	0.9914	0.96492		1824.75	0.75433	0.93589	0.6369		1824.75	0.122439	0.0287752	0.195929		1674.75	0.999985	0.999987	0.999915									1976	0.97545
1824.5	0.98056	0.99338	0.9637		1824.5	0.98159	0.99187	0.96471		1824.5	0.73813	0.93755	0.63516		1824.5	0.131867	0.0280056	0.197117		1674.5	0.999992	0.999986	0.999932									1975.75	0.97435
1824.25	0.97914	0.99363	0.96337		1824.25	0.98059	0.99266	0.9648		1824.25	0.72589	0.94046	0.63594		1824.25	0.139129	0.0266597	0.196584		1674.25	0.999999	0.999984	0.999948									1975.5	0.97419
1824	0.97955	0.99405	0.96408		1824	0.981	0.99365	0.96551		1824	0.73088	0.94468	0.6419		1824	0.136154	0.0247153	0.192533		1674	1.00001	0.999983	0.999964									1975.25	0.9755
1823.75	0.98162	0.9945	0.9653		1823.75	0.98274	0.9948	0.9664		1823.75	0.75242	0.94997	0.64938		1823.75	0.12354	0.0222901	0.187501		1673.75	1.00001	0.999981	0.99998									1975	0.97655
1823.5	0.98363	0.99473	0.96591		1823.5	0.98428	0.99577	0.96655		1823.5	0.77184	0.95553	0.65063		1823.5	0.112473	0.0197557	0.186666		1673.5	1.00002	0.999979	0.999994									1974.75	0.97634
1823.25	0.98402	0.99459	0.96523		1823.25	0.98423	0.99606	0.96544		1823.25	0.77128	0.95955	0.64131		1823.25	0.112788	0.0179324	0.192932		1673.25	1.00002	0.999976	1.00001									1974.5	0.97562
1823	0.9833	0.99436	0.96434		1823	0.98319	0.99583	0.96423		1823	0.75804	0.96038	0.63119		1823	0.120308	0.0175569	0.19984		1673	1.00003	0.999974	1.00002									1974.25	0.97508
1822.75	0.98278	0.99446	0.96458		1822.75	0.9824	0.9956	0.96422		1822.75	0.74815	0.95792	0.63109		1822.75	0.126011	0.0186708	0.199909		1672.75	1.00003	0.999971	1.00003									1974	0.97494
1822.5	0.98302	0.99474	0.9654		1822.5	0.98236	0.9954	0.96475		1822.5	0.74767	0.95611	0.63553		1822.5	0.12629	0.0194921	0.196864		1672.5	1.00003	0.999967	1.00004									1973.75	0.97529
1822.25	0.98395	0.99478	0.96571		1822.25	0.98297	0.995	0.96475		1822.25	0.75524	0.95997	0.63549		1822.25	0.121915	0.0177423	0.196891		1672.25	1.00004	0.999964	1.00005									1973.5	0.97601
1822	0.98462	0.99445	0.96576		1822	0.98337	0.99434	0.96453		1822	0.76024	0.96966	0.6337		1822	0.119049	0.0133805	0.198116		1672	1.00004	0.99996	1.00006									1973.25	0.97648
1821.75	0.98424	0.99386	0.96594		1821.75	0.98289	0.99348	0.96462		1821.75	0.75425	0.97985	0.6344		1821.75	0.122485	0.0088404	0.197637		1671.75	1.00004	0.999956	1.00007									1973	0.97607
1821.5	0.98364	0.99321	0.96578		1821.5	0.98232	0.99255	0.96448		1821.5	0.7471	0.98592	0.63325		1821.5	0.126621	0.00615832	0.198425		1671.5	1.00004	0.999951	1.00007									1972.75	0.97516
1821.25	0.98369	0.99273	0.96512		1821.25	0.9824	0.99174	0.96385		1821.25	0.74811	0.98631	0.62808		1821.25	0.126035	0.00598656	0.201985		1671.25	1.00004	0.999946	1.00008									1972.5	0.97463
1821	0.98367	0.99256	0.96474		1821	0.98233	0.9913	0.96343		1821	0.74729	0.98126	0.6246		1821	0.126511	0.0082159	0.204398		1671	1.00004	0.999941	1.00008									1972.25	0.97434
1820.75	0.98316	0.99269	0.96515		1820.75	0.98169	0.99133	0.96371		1820.75	0.73935	0.9724	0.62695		1820.75	0.13115	0.012155	0.202767		1670.75	1.00004	0.999935	1.00008									1972	0.9738
1820.5	0.9832	0.99299	0.96589		1820.5	0.98171	0.99165	0.96442		1820.5	0.73955	0.96389	0.63278		1820.5	0.131032	0.0159725	0.198747		1670.5	1.00003	0.999929	1.00008									1971.75	0.9739
1820.25	0.98408	0.99327	0.96632		1820.25	0.98279	0.99197	0.96505		1820.25	0.75302	0.95784	0.63803		1820.25	0.123193	0.018707	0.195159		1670.25	1.00003	0.999922	1.00008									1971.5	0.9754
1820	0.98437	0.99335	0.9662		1820	0.9835	0.99199	0.96534		1820	0.7619	0.95416	0.64048		1820	0.118102	0.0203788	0.193494		1670	1.00002	0.999916	1.00008									1971.25	0.97671
1819.75	0.98316	0.99312	0.9654		1819.75	0.98285	0.99164	0.9651		1819.75	0.75374	0.9522	0.63841		1819.75	0.122778	0.0212718	0.1949		1669.75	1.00002	0.999908	1.00007									1971	0.97623
1819.5	0.98062	0.99263	0.96364		1819.5	0.98104	0.99112	0.96406		1819.5	0.73144	0.9517	0.62982		1819.5	0.135821	0.0214999	0.200784		1669.5	1.00001	0.999901	1.00006									1970.75	0.97522
1819.25	0.97789	0.99215	0.96148		1819.25	0.97913	0.99085	0.9627		1819.25	0.70845	0.95192	0.61864		1819.25	0.149691	0.0213995	0.208562		1669.25	1	0.999892	1.00005									1970.5	0.97521
1819	0.97743	0.9921	0.9608		1819	0.97932	0.99122	0.96266		1819	0.7107	0.95219	0.6183		1819	0.148314	0.0212764	0.208801		1669	0.99999	0.999884	1.00005									1970.25	0.97548
1818.75	0.97892	0.99267	0.96174		1818.75	0.98124	0.99236	0.96402		1818.75	0.73381	0.95123	0.62943		1818.75	0.134416	0.0217145	0.201053		1668.75	0.999979	0.999875	1.00003									1970	0.9752
1818.5	0.97843	0.99349	0.9618		1818.5	0.98116	0.99393	0.96449		1818.5	0.7329	0.94753	0.63331		1818.5	0.134955	0.023407	0.198384		1668.5	0.999967	0.999866	1.00002									1969.75	0.97498
1818.25	0.97592	0.99417	0.96033		1818.25	0.97936	0.99543	0.96371		1818.25	0.71117	0.94175	0.62695		1818.25	0.148027	0.0260644	0.202767		1668.25	0.999953	0.999856	1.00001									1969.5	0.97528
1818	0.97421	0.99455	0.95841		1818	0.97884	0.99646	0.96297		1818	0.70502	0.93894	0.62083		1818	0.151799	0.0273622	0.207027		1668	0.999938	0.999846	0.99999									1969.25	0.9758
1817.75	0.97404	0.99467	0.9567		1817.75	0.98011	0.99702	0.96266		1817.75	0.7201	0.94177	0.61832		1817.75	0.142607	0.0260551	0.208787		1667.75	0.999923	0.999836	0.999972									1969	0.97605
1817.5	0.97478	0.99475	0.95603		1817.5	0.98175	0.99753	0.96287		1817.5	0.74011	0.94674	0.62005		1817.5	0.130704	0.0237693	0.207573		1667.5	0.999906	0.999826	0.999952									1968.75	0.97562
1817.25	0.97564	0.99502	0.95709		1817.25	0.9825	0.99852	0.96382		1817.25	0.74937	0.9514	0.62783		1817.25	0.125304	0.0216369	0.202158		1667.25	0.999888	0.999815	0.999932									1968.5	0.97467
1817	0.9758	0.99552	0.95892		1817	0.98173	1.0003	0.96474		1817	0.7398	0.9563	0.63542		1817	0.130886	0.0194058	0.196939		1667	0.999868	0.999804	0.999909									1968.25	0.97413
1816.75	0.97649	0.99609	0.96042		1816.75	0.98108	1.0023	0.96493		1816.75	0.73186	0.9604	0.637		1816.75	0.135572	0.0175478	0.195861		1666.75	0.999848	0.999793	0.999886									1968	0.97406
1816.5	0.97884	0.99637	0.96156		1816.5	0.98209	1.0035	0.96475		1816.5	0.7443	0.96274	0.63554		1816.5	0.128252	0.016491	0.196857		1666.5	0.999827	0.999782	0.99986									1967.75	0.97328
1816.25	0.98113	0.99635	0.96273		1816.25	0.98334	1.0034	0.96491		1816.25	0.75991	0.96304	0.63682		1816.25	0.119238	0.0163557	0.195983		1666.25	0.999804	0.99977	0.999834									1967.5	0.97171
1816	0.98134	0.99636	0.96402		1816	0.98293	1.0024	0.96559		1816	0.75481	0.96151	0.6425		1816	0.122162	0.0170462	0.192127		1666	0.999781	0.999758	0.999806									1967.25	0.97094
1815.75	0.98025	0.99646	0.96429		1815.75	0.98152	1.0011	0.96554		1815.75	0.73726	0.95978	0.64214		1815.75	0.132379	0.0178283	0.19237		1665.75	0.999756	0.999747	0.999777									1967	0.9716
1815.5	0.97924	0.9965	0.96292		1815.5	0.98031	0.99981	0.96397		1815.5	0.72257	0.95872	0.62902		1815.5	0.14112	0.0183082	0.201336		1665.5	0.999731	0.999735	0.999748									1966.75	0.97241
1815.25	0.97816	0.99653	0.96123		1815.25	0.9793	0.99878	0.96234		1815.25	0.71045	0.95437	0.61578		1815.25	0.148466	0.0202832	0.210574		1665.25	0.999705	0.999723	0.999716									1966.5	0.97235
1815	0.97673	0.99664	0.96056		1815	0.97829	0.99826	0.96209		1815	0.69855	0.94449	0.61372		1815	0.155803	0.0248026	0.21203		1665	0.999678	0.999711	0.999684									1966.25	0.97116
1814.75	0.97533	0.99654	0.96055		1814.75	0.97744	0.99783	0.96264		1814.75	0.68877	0.93383	0.61815		1814.75	0.161926	0.0297322	0.208906		1664.75	0.99965	0.999699	0.999652									1966	0.97025
1814.5	0.97471	0.99611	0.96066		1814.5	0.97722	0.9972	0.96313		1814.5	0.68618	0.92694	0.62214		1814.5	0.163562	0.0329484	0.206112		1664.5	0.999621	0.999687	0.999618									1965.75	0.97147
1814.25	0.97631	0.99574	0.96127		1814.25	0.97883	0.9969	0.96375		1814.25	0.70492	0.92276	0.62722		1814.25	0.15186	0.0349112	0.20258		1664.25	0.999592	0.999675	0.999583									1965.5	0.97351
1814	0.97974	0.99574	0.96255		1814	0.98188	0.99733	0.96466		1814	0.74166	0.91904	0.63475		1814	0.129795	0.0366656	0.197397		1664	0.999562	0.999664	0.999548									1965.25	0.97423
1813.75	0.98208	0.99574	0.96414		1813.75	0.98372	0.9979	0.96576		1813.75	0.76475	0.91586	0.64393		1813.75	0.116481	0.0381709	0.191161		1663.75	0.999532	0.999652	0.999513									1965	0.97411
1813.5	0.98239	0.99532	0.96563		1813.5	0.98362	0.99788	0.96684		1813.5	0.76346	0.9135	0.65315		1813.5	0.117214	0.0392914	0.184987		1663.5	0.999501	0.99964	0.999476									1964.75	0.97433
1813.25	0.98209	0.99455	0.9662		1813.25	0.98298	0.99711	0.96708		1813.25	0.75537	0.91207	0.65515		1813.25	0.12184	0.0399718	0.183659		1663.25	0.99947	0.999629	0.99944									1964.5	0.97454
1813	0.98215	0.99376	0.96552		1813	0.98271	0.99593	0.96608		1813	0.75205	0.91168	0.64669		1813	0.123753	0.0401576	0.189304		1663	0.999439	0.999617	0.999403									1964.25	0.9742
1812.75	0.98213	0.99332	0.96446		1812.75	0.98233	0.99498	0.96466		1812.75	0.74732	0.91272	0.63474		1812.75	0.126493	0.0396624	0.197404		1662.75	0.999407	0.999606	0.999365									1964	0.9739
1812.5	0.98155	0.99335	0.96362		1812.5	0.98145	0.99459	0.96352		1812.5	0.73641	0.91422	0.62532		1812.5	0.13288	0.0389493	0.203898		1662.5	0.999375	0.999595	0.999328									1963.75	0.97413
1812.25	0.98017	0.99369	0.9631		1812.25	0.98001	0.99459	0.96294		1812.25	0.71894	0.91404	0.62064		1812.25	0.143307	0.0390348	0.20716		1662.25	0.999343	0.999585	0.999291									1963.5	0.97432
1812	0.9789	0.99399	0.96305		1812	0.97887	0.99457	0.96302		1812	0.7054	0.91171	0.62131		1812	0.151565	0.0401433	0.206692		1662	0.999311	0.999574	0.999254									1963.25	0.97406
1811.75	0.97948	0.99393	0.96359		1811.75	0.97948	0.99413	0.96359		1811.75	0.71258	0.90961	0.62593		1811.75	0.147166	0.0411448	0.203474		1661.75	0.999279	0.999564	0.999217									1963	0.97392
1811.5	0.98137	0.99357	0.96449		1811.5	0.98114	0.99346	0.96426		1811.5	0.73262	0.90973	0.63148		1811.5	0.135121	0.0410875	0.19964		1661.5	0.999248	0.999554	0.99918									1962.75	0.97438
1811.25	0.98213	0.99346	0.96526		1811.25	0.98153	0.9933	0.96467		1811.25	0.73744	0.91294	0.63483		1811.25	0.132273	0.0395578	0.197343		1661.25	0.999216	0.999545	0.999143									1962.5	0.97506
1811	0.9816	0.99372	0.96566		1811	0.98071	0.99369	0.9648		1811	0.72744	0.91855	0.6359		1811	0.138203	0.0368972	0.196611		1661	0.999185	0.999536	0.999107									1962.25	0.97565
1810.75	0.98126	0.99391	0.96578		1810.75	0.98047	0.99391	0.96499		1810.75	0.72445	0.92442	0.63755		1810.75	0.139992	0.0341307	0.195486		1660.75	0.999154	0.999527	0.999071									1962	0.97635
1810.5	0.98151	0.99374	0.96564		1810.5	0.98125	0.99351	0.96538		1810.5	0.73389	0.92743	0.64074		1810.5	0.134369	0.0327189	0.193318		1660.5	0.999123	0.999519	0.999036									1961.75	0.97684
1810.25	0.98179	0.99331	0.96521		1810.25	0.98237	0.9927	0.96578		1810.25	0.74777	0.92555	0.64415		1810.25	0.126232	0.0336001	0.191013		1660.25	0.999093	0.999511	0.999002									1961.5	0.97611
1810	0.98138	0.9929	0.96461		1810	0.9828	0.99201	0.966		1810	0.75317	0.92257	0.64603		1810	0.123107	0.0350007	0.189747		1660	0.999064	0.999503	0.998968									1961.25	0.97444
1809.75	0.97965	0.99282	0.96375		1809.75	0.98164	0.99201	0.96571		1809.75	0.73877	0.92393	0.64357		1809.75	0.131491	0.0343609	0.191404		1659.75	0.999036	0.999496	0.998935									1961	0.9737
1809.5	0.97707	0.99313	0.96243		1809.5	0.97945	0.99286	0.96477		1809.5	0.71223	0.92766	0.63571		1809.5	0.14738	0.0326112	0.196741		1659.5	0.999008	0.999489	0.998904									1960.75	0.97438
1809.25	0.97533	0.99364	0.96082		1809.25	0.97817	0.99423	0.96362		1809.25	0.6972	0.92818	0.62617		1809.25	0.156643	0.0323678	0.203308		1659.25	0.998981	0.999483	0.998873									1960.5	0.97513
1809	0.97389	0.99414	0.95917		1809	0.97747	0.99558	0.9627		1809	0.68913	0.92382	0.61864		1809	0.161699	0.0344126	0.208562		1659	0.998955	0.999477	0.998844									1960.25	0.97535
1808.75	0.97147	0.99451	0.95773		1808.75	0.97608	0.99653	0.96227		1808.75	0.67321	0.91601	0.61517		1808.75	0.171849	0.0380998	0.211005		1658.75	0.99893	0.999472	0.998816									1960	0.97552
1808.5	0.96956	0.99482	0.95706		1808.5	0.97516	0.99724	0.96259		1808.5	0.66294	0.90744	0.61773		1808.5	0.178526	0.0421821	0.209201		1658.5	0.998906	0.999467	0.99879									1959.75	0.97572
1808.25	0.96955	0.99526	0.95738		1808.25	0.97582	0.99817	0.96358		1808.25	0.67036	0.90123	0.62581		1808.25	0.173692	0.0451644	0.203558		1658.25	0.998883	0.999462	0.998765									1959.5	0.97572
1808	0.97126	0.99588	0.9583		1808	0.97772	0.99955	0.96467		1808	0.69198	0.89911	0.63488		1808	0.159906	0.0461872	0.197308		1658	0.998861	0.999458	0.998741									1959.25	0.97584
1807.75	0.9731	0.99652	0.9588		1807.75	0.97936	1.0012	0.96497		1807.75	0.71117	0.9007	0.63734		1807.75	0.148027	0.0454198	0.195629		1657.75	0.99884	0.999454	0.998719									1959	0.97642
1807.5	0.97348	0.99692	0.95805		1807.5	0.97942	1.0027	0.9639		1807.5	0.71188	0.90464	0.62849		1807.5	0.147593	0.0435242	0.201702		1657.5	0.998821	0.999451	0.998699									1958.75	0.97639
1807.25	0.97234	0.99696	0.95633		1807.25	0.97816	1.0034	0.96206		1807.25	0.69703	0.90827	0.61345		1807.25	0.156749	0.041785	0.212221		1657.25	0.998803	0.999448	0.99868									1958.5	0.97473
1807	0.97052	0.99686	0.95474		1807	0.97654	1.0035	0.96067		1807	0.67848	0.90928	0.60238		1807	0.168463	0.0413024	0.220129		1657	0.998787	0.999446	0.998664									1958.25	0.97286
1806.75	0.96881	0.99693	0.95405		1806.75	0.97543	1.0033	0.96057		1806.75	0.66594	0.90634	0.60159		1806.75	0.176565	0.0427089	0.220699		1656.75	0.998771	0.999444	0.998649									1958	0.9727
1806.5	0.96843	0.99736	0.95452		1806.5	0.97581	1.0035	0.96179		1806.5	0.67016	0.89996	0.61132		1806.5	0.173821	0.0457768	0.213731		1656.5	0.998757	0.999442	0.998635									1957.75	0.97412
1806.25	0.97031	0.99797	0.95593		1806.25	0.97809	1.0039	0.96359		1806.25	0.69624	0.89374	0.62592		1806.25	0.157241	0.0487888	0.203481		1656.25	0.998745	0.999441	0.998624									1957.5	0.97593
1806	0.97238	0.99822	0.95693		1806	0.97965	1.0044	0.96409		1806	0.71465	0.89318	0.63005		1806	0.145907	0.049061	0.200625		1656	0.998734	0.99944	0.998615									1957.25	0.97674
1805.75	0.97308	0.9977	0.95726		1805.75	0.9791	1.0045	0.96319		1805.75	0.70815	0.90049	0.62266		1805.75	0.149875	0.0455211	0.205749		1655.75	0.998724	0.99944	0.998607									1957	0.97587
1805.5	0.9735	0.9965	0.95811		1805.5	0.97827	1.0041	0.96281		1805.5	0.69836	0.91118	0.61952		1805.5	0.155921	0.0403958	0.207945		1655.5	0.998716	0.99944	0.998601									1956.75	0.97468
1805.25	0.97452	0.9952	0.95976		1805.25	0.97835	1.0032	0.96353		1805.25	0.69934	0.9201	0.62546		1805.25	0.155312	0.036165	0.2038		1655.25	0.99871	0.99944	0.998597									1956.5	0.97457
1805	0.97621	0.99453	0.96144		1805	0.97933	1.002	0.96452		1805	0.71086	0.92502	0.63361		1805	0.148216	0.0338489	0.198178		1655	0.998704	0.999441	0.998595									1956.25	0.9751
1804.75	0.97771	0.99466	0.96235		1804.75	0.98021	1.0008	0.96482		1804.75	0.72138	0.92664	0.63608		1804.75	0.141836	0.033089	0.196488		1654.75	0.9987	0.999441	0.998595									1956	0.97545
1804.5	0.97812	0.99502	0.96229		1804.5	0.97999	0.9999	0.96413		1804.5	0.71868	0.92774	0.63039		1804.5	0.143464	0.0325737	0.200391		1654.5	0.998698	0.999442	0.998596									1955.75	0.97551
1804.25	0.97755	0.99523	0.9618		1804.25	0.97895	0.99914	0.96319		1804.25	0.70639	0.9313	0.62262		1804.25	0.150955	0.0309104	0.205777		1654.25	0.998697	0.999444	0.9986									1955.5	0.97523
1804	0.97667	0.99532	0.96164		1804	0.9781	0.9985	0.96304		1804	0.69643	0.93804	0.62146		1804	0.157123	0.0277786	0.206587		1654	0.998697	0.999445	0.998605									1955.25	0.97451
1803.75	0.97557	0.99533	0.96127		1803.75	0.9776	0.99788	0.96327		1803.75	0.69056	0.94569	0.62332		1803.75	0.160799	0.0242512	0.205289		1653.75	0.998699	0.999447	0.998612									1955	0.97358
1803.5	0.9739	0.99537	0.95966		1803.5	0.97701	0.99727	0.96273		1803.5	0.68381	0.94947	0.61893		1803.5	0.165065	0.0225188	0.208358		1653.5	0.998701	0.999449	0.998621									1954.75	0.97309
1803.25	0.97154	0.99552	0.95712		1803.25	0.97623	0.99696	0.96174		1803.25	0.67493	0.94924	0.61095		1803.25	0.170741	0.022624	0.213994		1653.25	0.998705	0.999451	0.998632									1954.5	0.97334
1803	0.96851	0.99581	0.95469		1803	0.97517	0.99726	0.96126		1803	0.66311	0.94941	0.60708		1803	0.178414	0.0225462	0.216754		1653	0.998711	0.999453	0.998643									1954.25	0.97394
1802.75	0.96654	0.9961	0.95392		1802.75	0.97493	0.99817	0.96221		1802.75	0.66041	0.9507	0.61467		1802.75	0.180186	0.0219565	0.211358		1652.75	0.998717	0.999456	0.998657									1954	0.9745
1802.5	0.96817	0.99628	0.95609		1802.5	0.97719	0.99947	0.965		1802.5	0.68587	0.95122	0.63761		1802.5	0.163758	0.021719	0.195445		1652.5	0.998724	0.999458	0.998672									1953.75	0.97492
1802.25	0.97067	0.99623	0.95844		1802.25	0.97907	1.001	0.96673		1802.25	0.70777	0.95172	0.65218		1802.25	0.150108	0.0214908	0.185633		1652.25	0.998733	0.999461	0.998688									1953.5	0.97514
1802	0.97115	0.99592	0.95867		1802	0.97823	1.0028	0.96566		1802	0.69785	0.95311	0.64312		1802	0.156238	0.020857	0.191708		1652	0.998742	0.999463	0.998705									1953.25	0.97517
1801.75	0.97131	0.99567	0.9584		1801.75	0.97696	1.0043	0.96398		1801.75	0.68327	0.95183	0.62911		1801.75	0.165408	0.0214406	0.201273		1651.75	0.998752	0.999466	0.998724									1953	0.97517
1801.5	0.97288	0.99592	0.95927		1801.5	0.97739	1.0052	0.96372		1801.5	0.68818	0.94602	0.62702		1801.5	0.162298	0.0240997	0.202719		1651.5	0.998763	0.999469	0.998744									1952.75	0.97531
1801.25	0.97465	0.9964	0.96033		1801.25	0.97859	1.005	0.96422		1801.25	0.70212	0.94099	0.63112		1801.25	0.153589	0.026415	0.199888		1651.25	0.998775	0.999472	0.998764									1952.5	0.97563
1801	0.97521	0.99661	0.96041		1801	0.9792	1.0039	0.96434		1801	0.7093	0.94096	0.63211		1801	0.14917	0.0264288	0.199207		1651	0.998788	0.999475	0.998786									1952.25	0.97609
1800.75	0.97381	0.99652	0.95906		1800.75	0.9783	1.0023	0.96348		1800.75	0.69872	0.94095	0.62505		1800.75	0.155697	0.0264335	0.204085		1650.75	0.998801	0.999478	0.998809									1952	0.97622
1800.5	0.97065	0.99634	0.9565		1800.5	0.97589	1.001	0.96167		1800.5	0.67109	0.93539	0.61034		1800.5	0.173219	0.0290073	0.214428		1650.5	0.998815	0.999481	0.998832									1951.75	0.97566
1800.25	0.96693	0.9963	0.95342		1800.25	0.973	1.0003	0.95941		1800.25	0.63941	0.92507	0.59247		1800.25	0.194221	0.0338254	0.227334		1650.25	0.99883	0.999484	0.998856									1951.5	0.97515
1800	0.96359	0.9965	0.95042		1800	0.97048	1.0006	0.95722		1800	0.61279	0.91465	0.57559		1800	0.212688	0.0387451	0.239887		1650	0.998845	0.999486	0.99888									1951.25	0.97552
1799.75	0.96137	0.99694	0.94878		1799.75	0.9689	1.0015	0.95621		1799.75	0.59671	0.90888	0.56801		1799.75	0.224237	0.0414935	0.245644		1649.75	0.99886	0.999489	0.998905									1951	0.97577
1799.5	0.96157	0.99738	0.95006		1799.5	0.96945	1.0028	0.95785		1799.5	0.60232	0.90926	0.58045		1799.5	0.220173	0.0413119	0.236235		1649.5	0.998876	0.999492	0.99893									1950.75	0.9749
1799.25	0.9647	0.99744	0.95299		1799.25	0.97263	1.0037	0.96083		1799.25	0.63545	0.91369	0.60362		1799.25	0.196919	0.0392011	0.219236		1649.25	0.998892	0.999495	0.998956									1950.5	0.97419
1799	0.9675	0.99684	0.95358		1799	0.97556	1.004	0.96153		1799	0.66743	0.91775	0.60925		1799	0.175594	0.0372756	0.215204		1649	0.998909	0.999498	0.998982									1950.25	0.97482
1798.75	0.96739	0.99565	0.95192		1798.75	0.97618	1.0034	0.96056		1798.75	0.67435	0.91685	0.60155		1798.75	0.171115	0.0377017	0.220728		1648.75	0.998925	0.9995	0.999008									1950	0.97571
1798.5	0.96525	0.99438	0.9499		1798.5	0.97545	1.0025	0.95993		1798.5	0.66614	0.91213	0.59659		1798.5	0.176434	0.0399433	0.224324		1648.5	0.998942	0.999503	0.999034									1949.75	0.97567
1798.25	0.96152	0.99405	0.94776		1798.25	0.97365	1.0022	0.95972		1798.25	0.64641	0.91076	0.5949		1798.25	0.189492	0.0405961	0.225556		1648.25	0.998959	0.999506	0.99906									1949.5	0.97491
1798	0.95757	0.99536	0.94618		1798	0.97168	1.0037	0.96013		1798	0.62529	0.91415	0.59809		1798	0.203919	0.0389825	0.223233		1648	0.998976	0.999508	0.999086									1949.25	0.97418
1797.75	0.9584	0.99779	0.9477		1797.75	0.97364	1.0069	0.96278		1797.75	0.64629	0.91658	0.61929		1797.75	0.189573	0.0378296	0.208106		1647.75	0.998993	0.99951	0.999112									1949	0.97441
1797.5	0.96384	1.0001	0.95139		1797.5	0.97858	1.0107	0.96594		1797.5	0.70201	0.9144	0.64551		1797.5	0.153657	0.0388638	0.190097		1647.5	0.99901	0.999513	0.999138									1948.75	0.97565
1797.25	0.96681	1.0015	0.95296		1797.25	0.97948	1.0141	0.96545		1797.25	0.71264	0.90875	0.64139		1797.25	0.14713	0.0415556	0.192878		1647.25	0.999027	0.999515	0.999163									1948.5	0.97644
1797	0.96719	1.0017	0.95323		1797	0.97724	1.0165	0.96314		1797	0.68646	0.90347	0.62225		1797	0.163385	0.0440863	0.206035		1647	0.999043	0.999517	0.999187									1948.25	0.97597
1796.75	0.96798	1.0011	0.95452		1796.75	0.97569	1.0171	0.96212		1796.75	0.66889	0.90242	0.61401		1796.75	0.174645	0.0445913	0.211825		1646.75	0.999059	0.999518	0.999211									1948	0.97519
1796.5	0.97005	1.0002	0.95661		1796.5	0.97582	1.0155	0.9623		1796.5	0.67036	0.90638	0.61545		1796.5	0.173692	0.0426897	0.210807		1646.5	0.999075	0.99952	0.999234									1947.75	0.97484
1796.25	0.97281	0.99925	0.95826		1796.25	0.97701	1.0124	0.9624		1796.25	0.68379	0.91306	0.61624		1796.25	0.165077	0.0395007	0.21025		1646.25	0.99909	0.999521	0.999256									1947.5	0.97487
1796	0.97511	0.99848	0.95976		1796	0.97823	1.0089	0.96284		1796	0.69789	0.91971	0.61977		1796	0.156213	0.0363491	0.207769		1646	0.999104	0.999522	0.999277									1947.25	0.97502
1795.75	0.97624	0.99772	0.96162		1795.75	0.97884	1.0057	0.96418		1795.75	0.705	0.92449	0.63076		1795.75	0.151811	0.0340978	0.200136		1645.75	0.999119	0.999523	0.999298									1947	0.97496
1795.5	0.97637	0.99695	0.96256		1795.5	0.97868	1.0029	0.96483		1795.5	0.70311	0.92868	0.63621		1795.5	0.152977	0.0321339	0.1964		1645.5	0.999132	0.999524	0.999317									1946.75	0.97459
1795.25	0.97608	0.99621	0.96158		1795.25	0.97804	1.0005	0.96351		1795.25	0.69564	0.9346	0.62524		1795.25	0.157615	0.0293742	0.203953		1645.25	0.999145	0.999524	0.999335									1946.5	0.97405
1795	0.97601	0.99557	0.9607		1795	0.97748	0.99876	0.96215		1795	0.6892	0.94293	0.61425		1795	0.161655	0.0255205	0.211655		1645	0.999157	0.999524	0.999352									1946.25	0.97341
1794.75	0.97663	0.99504	0.96182		1794.75	0.97756	0.99768	0.96273		1794.75	0.69015	0.95153	0.61891		1794.75	0.161057	0.0215775	0.208373		1644.75	0.999168	0.999524	0.999369									1946	0.97266
1794.5	0.97799	0.99455	0.96347		1794.5	0.97841	0.9969	0.96389		1794.5	0.70002	0.95702	0.62841		1794.5	0.15489	0.019079	0.201757		1644.5	0.999179	0.999523	0.999383									1945.75	0.97245
1794.25	0.97969	0.99403	0.96413		1794.25	0.97976	0.99602	0.96419		1794.25	0.71591	0.9575	0.63088		1794.25	0.145142	0.0188612	0.200053		1644.25	0.999189	0.999522	0.999397									1945.5	0.97338
1794	0.98129	0.99341	0.9646		1794	0.98106	0.99491	0.96437		1794	0.73159	0.95611	0.63237		1794	0.135732	0.0194921	0.199029		1644	0.999198	0.999521	0.999409									1945.25	0.97432
1793.75	0.98223	0.99271	0.96552		1793.75	0.98172	0.99365	0.96502		1793.75	0.73975	0.95714	0.63777		1793.75	0.130915	0.0190245	0.195336		1643.75	0.999206	0.999519	0.99942									1945	0.97368
1793.5	0.98171	0.99216	0.96571		1793.5	0.98105	0.99259	0.96506		1793.5	0.73148	0.96308	0.63812		1793.5	0.135798	0.0163376	0.195098		1643.5	0.999213	0.999517	0.99943									1944.75	0.97257
1793.25	0.97995	0.99185	0.96464		1793.25	0.9793	0.99192	0.96401		1793.25	0.71053	0.97144	0.62936		1793.25	0.148418	0.012584	0.201101		1643.25	0.99922	0.999514	0.999439									1944.5	0.97268
1793	0.97898	0.99162	0.96357		1793	0.97833	0.99139	0.96293		1793	0.69901	0.97492	0.62051		1793	0.155517	0.011031	0.207251		1643	0.999225	0.999511	0.999446									1944.25	0.97291
1792.75	0.9793	0.99136	0.96319		1792.75	0.97866	0.99084	0.96255		1792.75	0.70289	0.96776	0.61745		1792.75	0.153113	0.0142323	0.209398		1642.75	0.99923	0.999508	0.999452									1944	0.97194
1792.5	0.97862	0.99119	0.96268		1792.5	0.97836	0.99052	0.96243		1792.5	0.69941	0.95132	0.61644		1792.5	0.155268	0.0216734	0.210109		1642.5	0.999233	0.999504	0.999456									1943.75	0.971
1792.25	0.97606	0.99126	0.96152		1792.25	0.97683	0.9906	0.96228		1792.25	0.68181	0.93378	0.61529		1792.25	0.166337	0.0297554	0.21092		1642.25	0.999236	0.999499	0.999459									1943.5	0.97133
1792	0.97342	0.99155	0.95997		1792	0.97583	0.99088	0.96234		1792	0.67041	0.92476	0.61575		1792	0.17366	0.033971	0.210596		1642	0.999238	0.999494	0.999461									1943.25	0.97172
1791.75	0.97224	0.99199	0.95844		1791.75	0.97644	0.99133	0.96258		1791.75	0.67731	0.92648	0.61771		1791.75	0.169213	0.033164	0.209215		1641.75	0.999239	0.999489	0.999461									1943	0.97105
1791.5	0.97287	0.99248	0.95787		1791.5	0.97812	0.99221	0.96304		1791.5	0.69659	0.93133	0.62141		1791.5	0.157023	0.0308964	0.206622		1641.5	0.999239	0.999483	0.999461									1942.75	0.96995
1791.25	0.97432	0.99291	0.95869		1791.25	0.97936	0.99369	0.96365		1791.25	0.71118	0.93417	0.62642		1791.25	0.14802	0.0295741	0.203134		1641.25	0.999238	0.999477	0.999459									1942.5	0.96923
1791	0.97551	0.99321	0.96016		1791	0.9795	0.99566	0.96409		1791	0.71286	0.93529	0.63004		1791	0.146996	0.0290537	0.200632		1641	0.999237	0.99947	0.999456									1942.25	0.96804
1790.75	0.97613	0.99334	0.96143		1790.75	0.97889	0.99763	0.96415		1790.75	0.70559	0.93543	0.63053		1790.75	0.151448	0.0289887	0.200294		1640.75	0.999234	0.999462	0.999453									1942	0.96682
1790.5	0.97619	0.9933	0.96171		1790.5	0.97797	0.99866	0.96346		1790.5	0.69484	0.93597	0.62486		1790.5	0.158115	0.0287381	0.204217		1640.5	0.999232	0.999454	0.999448									1941.75	0.96822
1790.25	0.97634	0.99312	0.96143		1790.25	0.97757	0.99826	0.96263		1790.25	0.69019	0.93809	0.61813		1790.25	0.161031	0.0277555	0.20892		1640.25	0.999228	0.999445	0.999443									1941.5	0.97139
1790	0.97716	0.99284	0.96154		1790	0.97826	0.9969	0.96262		1790	0.69822	0.94186	0.61805		1790	0.156008	0.0260136	0.208976		1640	0.999224	0.999436	0.999436									1941.25	0.97208
1789.75	0.97826	0.99251	0.96229		1789.75	0.97948	0.99531	0.96348		1789.75	0.71256	0.94588	0.62504		1789.75	0.147179	0.024164	0.204092		1639.75	0.999219	0.999427	0.99943									1941	0.97007
1789.5	0.97876	0.99221	0.96327		1789.5	0.98009	0.99401	0.96458		1789.5	0.71995	0.94833	0.6341		1789.5	0.142698	0.0230405	0.197842		1639.5	0.999214	0.999416	0.999422									1940.75	0.96972
1789.25	0.97838	0.99205	0.96361		1789.25	0.97977	0.99329	0.96499		1789.25	0.71612	0.94765	0.63749		1789.25	0.145014	0.023352	0.195527		1639.25	0.999208	0.999406	0.999414									1940.5	0.97178
1789	0.9772	0.99206	0.96269		1789	0.97866	0.99318	0.96413		1789	0.70297	0.94339	0.63037		1789	0.153063	0.0253087	0.200404		1639	0.999201	0.999395	0.999404									1940.25	0.97335
1788.75	0.97576	0.99217	0.96124		1788.75	0.97739	0.9934	0.96284		1788.75	0.68811	0.9401	0.61983		1788.75	0.162342	0.0268259	0.207727		1638.75	0.999194	0.999383	0.999395									1940	0.97351
1788.5	0.97477	0.99224	0.96048		1788.5	0.97674	0.99359	0.96242		1788.5	0.68071	0.94346	0.6164		1788.5	0.167038	0.0252765	0.210137		1638.5	0.999187	0.999371	0.999384									1939.75	0.97345
1788.25	0.97357	0.99236	0.95974		1788.25	0.97614	0.99377	0.96228		1788.25	0.67396	0.94993	0.61527		1788.25	0.171366	0.0223084	0.210934		1638.25	0.999179	0.999358	0.999373									1939.5	0.97362
1788	0.97136	0.99264	0.95807		1788	0.97483	0.99412	0.96149		1788	0.65931	0.95277	0.60891		1788	0.18091	0.0210119	0.215447		1638	0.999171	0.999345	0.999362									1939.25	0.97385
1787.75	0.96925	0.99304	0.95598		1787.75	0.97376	0.99469	0.96042		1787.75	0.64758	0.95161	0.60045		1787.75	0.188707	0.021541	0.221523		1637.75	0.999162	0.999331	0.99935									1939	0.97385
1787.5	0.96932	0.99338	0.95492		1787.5	0.97473	0.99539	0.96024		1787.5	0.65817	0.94914	0.59901		1787.5	0.181662	0.0226697	0.222566		1637.5	0.999153	0.999317	0.999338									1938.75	0.97343
1787.25	0.97186	0.99352	0.95658		1787.25	0.97778	0.99615	0.96241		1787.25	0.69271	0.94854	0.61634		1787.25	0.159449	0.0229444	0.21018		1637.25	0.999145	0.999303	0.999325									1938.5	0.97332
1787	0.97418	0.99337	0.95979		1787	0.98012	0.99692	0.96564		1787	0.72027	0.95122	0.64294		1787	0.142505	0.021719	0.19183		1637	0.999135	0.999288	0.999312									1938.25	0.97432
1786.75	0.97443	0.99286	0.96098		1786.75	0.98007	0.99748	0.96655		1786.75	0.71963	0.95721	0.65062		1786.75	0.142891	0.0189928	0.186673		1636.75	0.999126	0.999273	0.999299									1938	0.97552
1786.5	0.97318	0.99213	0.95979		1786.5	0.97847	0.99767	0.96501		1786.5	0.7007	0.96328	0.63772		1786.5	0.154468	0.0162475	0.19537		1636.5	0.999117	0.999258	0.999286									1937.75	0.97567
1786.25	0.97202	0.99171	0.95819		1786.25	0.97702	0.99775	0.96312		1786.25	0.68393	0.96412	0.62205		1786.25	0.164988	0.0158689	0.206175		1636.25	0.999108	0.999242	0.999273									1937.5	0.97533
1786	0.97187	0.99204	0.95759		1786	0.97663	0.99809	0.96228		1786	0.67951	0.95587	0.61529		1786	0.167804	0.0196012	0.21092		1636	0.999099	0.999226	0.999259									1937.25	0.97544
1785.75	0.97223	0.99286	0.95795		1785.75	0.97686	0.99861	0.96252		1785.75	0.68209	0.93976	0.61717		1785.75	0.166158	0.026983	0.209595		1635.75	0.99909	0.99921	0.999245									1937	0.9756
1785.5	0.97262	0.99374	0.95888		1785.5	0.97711	0.99914	0.96331		1785.5	0.68499	0.92288	0.6236		1785.5	0.164316	0.0348548	0.205094		1635.5	0.999081	0.999194	0.999232									1936.75	0.97524
1785.25	0.9732	0.99446	0.96014		1785.25	0.97728	0.99958	0.96417		1785.25	0.68695	0.91846	0.63069		1785.25	0.163075	0.0369398	0.200184		1635.25	0.999072	0.999178	0.999219									1936.5	0.97462
1785	0.97411	0.99481	0.96115		1785	0.97744	0.99969	0.96443		1785	0.68878	0.93589	0.63289		1785	0.161919	0.0287752	0.198672		1635	0.999064	0.999161	0.999205									1936.25	0.97424
1784.75	0.9754	0.99455	0.96121		1784.75	0.97776	0.99928	0.96354		1784.75	0.69243	0.96896	0.6255		1784.75	0.159624	0.0136942	0.203773		1634.75	0.999057	0.999145	0.999192									1936	0.97458
1784.5	0.97639	0.99375	0.96069		1784.5	0.97783	0.99834	0.96211		1784.5	0.69322	1.0015	0.61387		1784.5	0.159129	-0.000650954	0.211924		1634.5	0.999049	0.999128	0.99918									1935.75	0.97564
1784.25	0.97614	0.99283	0.96062		1784.25	0.977	0.997	0.96146		1784.25	0.68365	1.0212	0.6087		1784.25	0.165166	-0.00911081	0.215597		1634.25	0.999043	0.999112	0.999168									1935.5	0.97631
1784	0.97542	0.9922	0.96134		1784	0.97603	0.99559	0.96195		1784	0.67269	1.0247	0.61256		1784	0.172185	-0.0105967	0.212851		1634	0.999037	0.999095	0.999156									1935.25	0.97592
1783.75	0.97584	0.99201	0.96244		1783.75	0.97636	0.99441	0.96295		1783.75	0.67639	1.0162	0.62073		1783.75	0.169803	-0.00697919	0.207097		1633.75	0.999031	0.999078	0.999145									1935	0.9751
1783.5	0.97662	0.99209	0.96291		1783.5	0.97722	0.99355	0.96351		1783.5	0.68626	1.0023	0.62527		1783.5	0.163511	-0.00099773	0.203932		1633.5	0.999027	0.999062	0.999134									1934.75	0.97446
1783.25	0.97589	0.99211	0.96192		1783.25	0.9769	0.99298	0.96292		1783.25	0.6826	0.98941	0.62048		1783.25	0.165834	0.0046237	0.207272		1633.25	0.999023	0.999046	0.999124									1934.5	0.97377
1783	0.97395	0.99199	0.95989		1783	0.97575	0.99261	0.96165		1783	0.66953	0.97851	0.61023		1783	0.17423	0.00943473	0.214506		1633	0.99902	0.999029	0.999115									1934.25	0.97326
1782.75	0.97209	0.99186	0.95767		1782.75	0.97495	0.99239	0.96048		1782.75	0.66063	0.96801	0.60091		1782.75	0.180042	0.0141202	0.221191		1632.75	0.999018	0.999013	0.999107									1934	0.97372
1782.5	0.97064	0.99186	0.95618		1782.5	0.97472	0.99247	0.9602		1782.5	0.65806	0.95738	0.59865		1782.5	0.181735	0.0189156	0.222827		1632.5	0.999017	0.998997	0.999099									1933.75	0.97472
1782.25	0.97004	0.99202	0.95672		1782.25	0.97515	0.99305	0.96176		1782.25	0.66288	0.94736	0.61107		1782.25	0.178565	0.023485	0.213909		1632.25	0.999017	0.998981	0.999093									1933.5	0.97479
1782	0.97082	0.99225	0.95841		1782	0.97647	0.99408	0.96399		1782	0.67766	0.93867	0.62921		1782	0.168988	0.0274871	0.201204		1632	0.999018	0.998965	0.999087									1933.25	0.97386
1781.75	0.97234	0.99238	0.95938		1781.75	0.97804	0.9953	0.96501		1781.75	0.69571	0.93159	0.63768		1781.75	0.157572	0.0307752	0.195397		1631.75	0.99902	0.99895	0.999082									1933	0.97318
1781.5	0.97333	0.99228	0.95944		1781.5	0.97874	0.99645	0.96477		1781.5	0.70383	0.92507	0.63568		1781.5	0.152532	0.0338254	0.196761		1631.5	0.999023	0.998934	0.999079									1932.75	0.97327
1781.25	0.973	0.99194	0.9589		1781.25	0.97805	0.99717	0.96387		1781.25	0.69576	0.9182	0.62825		1781.25	0.157541	0.0370627	0.201868		1631.25	0.999027	0.998919	0.999076									1932.5	0.97371
1781	0.97149	0.99173	0.95773		1781	0.97653	0.99751	0.96269		1781	0.6783	0.91004	0.61861		1781	0.168578	0.0409395	0.208583		1631	0.999032	0.998904	0.999074									1932.25	0.97444
1780.75	0.96935	0.99195	0.95605		1780.75	0.97497	0.99777	0.96159		1780.75	0.66084	0.901	0.6097		1780.75	0.179904	0.0452752	0.214884		1630.75	0.999038	0.99889	0.999074									1932	0.97548
1780.5	0.96638	0.99261	0.95366		1780.5	0.9731	0.99812	0.96029		1780.5	0.64044	0.89388	0.59938		1780.5	0.193522	0.0487208	0.222298		1630.5	0.999045	0.998876	0.999074									1931.75	0.97585
1780.25	0.96271	0.99347	0.95063		1780.25	0.97083	0.99862	0.95865		1780.25	0.61647	0.88999	0.58661		1780.25	0.210088	0.0506149	0.231651		1630.25	0.999053	0.998862	0.999076									1931.5	0.97467
1780	0.96047	0.99416	0.9485		1780	0.96997	0.99931	0.95789		1780	0.6076	0.88702	0.58069		1780	0.216382	0.0520666	0.236056		1630	0.999062	0.998849	0.999079									1931.25	0.97334
1779.75	0.9617	0.99444	0.94882		1779.75	0.97229	1.0002	0.95926		1779.75	0.6318	0.88368	0.59135		1779.75	0.19942	0.053705	0.228155		1629.75	0.999072	0.998836	0.999083									1931	0.97353
1779.5	0.96422	0.99434	0.95035		1779.5	0.9757	1.0013	0.96167		1779.5	0.66901	0.88154	0.61034		1779.5	0.174567	0.054758	0.214428		1629.5	0.999083	0.998823	0.999088									1930.75	0.97426
1779.25	0.96223	0.99403	0.94948		1779.25	0.97473	1.0024	0.96181		1779.25	0.6582	0.88241	0.61148		1779.25	0.181642	0.0543296	0.213618		1629.25	0.999095	0.998811	0.999094									1930.5	0.97401
1779	0.95581	0.99351	0.94589		1779	0.96994	1.0033	0.95988		1779	0.60733	0.8861	0.59615		1779	0.216575	0.0525173	0.224644		1629	0.999108	0.9988	0.999102									1930.25	0.97348
1778.75	0.95059	0.99289	0.94227		1778.75	0.96693	1.0038	0.95847		1778.75	0.57722	0.89173	0.58516		1778.75	0.238659	0.0497666	0.232725		1628.75	0.999122	0.998789	0.99911									1930	0.97365
1778.5	0.94823	0.99255	0.93852		1778.5	0.96676	1.0044	0.95687		1778.5	0.57556	0.89797	0.57293		1778.5	0.239909	0.0467382	0.241898		1628.5	0.999137	0.998778	0.99912									1929.75	0.97407
1778.25	0.94821	0.99316	0.93484		1778.25	0.9682	1.0061	0.95455		1778.25	0.58975	0.90353	0.55566		1778.25	0.229332	0.0440574	0.255191		1628.25	0.999153	0.998768	0.99913									1929.5	0.97421
1778	0.95035	0.99526	0.93761		1778	0.97006	1.0116	0.95706		1778	0.60854	0.90748	0.57444		1778	0.215711	0.0421629	0.240755		1628	0.99917	0.998759	0.999142									1929.25	0.97437
1777.75	0.95318	0.99795	0.94509		1777.75	0.97054	1.0153	0.96231		1777.75	0.61348	0.90917	0.61551		1777.75	0.2122	0.0413549	0.210765		1627.75	0.999188	0.99875	0.999155									1929	0.97482
1777.5	0.95609	0.99945	0.94744		1777.5	0.97031	1.019	0.96153		1777.5	0.61111	0.90866	0.60923		1777.5	0.213881	0.0415986	0.215219		1627.5	0.999207	0.998742	0.999169									1928.75	0.97526
1777.25	0.95954	0.99915	0.94811		1777.25	0.97095	1.0202	0.95938		1777.25	0.61771	0.90636	0.59226		1777.25	0.209215	0.0426993	0.227488		1627.25	0.999226	0.998735	0.999183									1928.5	0.97538
1777	0.96344	0.99785	0.95165		1777	0.97262	1.0185	0.96071		1777	0.63528	0.90263	0.60271		1777	0.197035	0.0444902	0.219892		1627	0.999246	0.998727	0.999199									1928.25	0.97502
1776.75	0.96678	0.99681	0.95552		1776.75	0.97421	1.015	0.96286		1776.75	0.6525	0.89836	0.61998		1776.75	0.185419	0.0465496	0.207622		1626.75	0.999267	0.998721	0.999215									1928	0.97438
1776.5	0.96857	0.99646	0.9564		1776.5	0.97469	1.0113	0.96245		1776.5	0.65777	0.89456	0.61662		1776.5	0.181926	0.0483905	0.209982		1626.5	0.999289	0.998715	0.999232									1927.75	0.97406
1776.25	0.96887	0.99629	0.95575		1776.25	0.9743	1.0081	0.96111		1776.25	0.6535	0.89246	0.60591		1776.25	0.184754	0.0494112	0.217592		1626.25	0.999311	0.99871	0.99925									1927.5	0.97427
1776	0.96831	0.99581	0.95613		1776	0.97378	1.0053	0.96153		1776	0.64778	0.89267	0.60926		1776	0.188572	0.0493091	0.215197		1626	0.999334	0.998705	0.999269									1927.25	0.97458
1775.75	0.96664	0.99516	0.95627		1775.75	0.9727	1.0028	0.96226		1775.75	0.63617	0.89406	0.6151		1775.75	0.196427	0.0486333	0.211054		1625.75	0.999358	0.998701	0.999289									1927	0.97466
1775.5	0.96343	0.99468	0.95427		1775.5	0.97034	1.001	0.96111		1775.5	0.61144	0.89498	0.60592		1775.5	0.213646	0.0481867	0.217585		1625.5	0.999382	0.998698	0.999309									1926.75	0.97453
1775.25	0.96122	0.99448	0.95179		1775.25	0.96898	1.0001	0.95947		1775.25	0.5975	0.89644	0.59294		1775.25	0.223662	0.0474788	0.226989		1625.25	0.999407	0.998695	0.99933									1926.5	0.97417
1775	0.96474	0.99453	0.95267		1775	0.97302	1.0002	0.96085		1775	0.63955	0.90009	0.60378		1775	0.194125	0.0457141	0.219121		1625	0.999432	0.998693	0.999352									1926.25	0.97354
1774.75	0.97036	0.99479	0.95494		1774.75	0.97868	1.001	0.96313		1774.75	0.70318	0.90524	0.62213		1774.75	0.152933	0.0432363	0.206119		1624.75	0.999458	0.998691	0.999373									1926	0.97317
1774.5	0.96886	0.99516	0.95349		1774.5	0.97677	1.0023	0.96127		1774.5	0.68103	0.90973	0.60715		1774.5	0.166834	0.0410875	0.216704		1624.5	0.999484	0.99869	0.999396									1925.75	0.97369
1774.25	0.96679	0.99528	0.95356		1774.25	0.9738	1.0033	0.96047		1774.25	0.64795	0.91158	0.60081		1774.25	0.188459	0.0402052	0.221263		1624.25	0.99951	0.998689	0.999418									1925.5	0.97471
1774	0.9688	0.99479	0.95747		1774	0.97452	1.0033	0.96312		1774	0.65588	0.90958	0.62212		1774	0.183176	0.0411591	0.206126		1624	0.999537	0.99869	0.999441									1925.25	0.97526
1773.75	0.97127	0.99394	0.9603		1773.75	0.97562	1.0025	0.96459		1773.75	0.66805	0.90295	0.63422		1773.75	0.175191	0.0443363	0.19776		1623.75	0.999563	0.99869	0.999464									1925	0.97488
1773.5	0.97165	0.99343	0.95937		1773.5	0.9748	1.0015	0.96248		1773.5	0.65892	0.89358	0.6169		1773.5	0.181167	0.0488666	0.209785		1623.5	0.99959	0.998692	0.999488									1924.75	0.97369
1773.25	0.97186	0.99339	0.95839		1773.25	0.97423	1.0006	0.96073		1773.25	0.65266	0.88817	0.60283		1773.25	0.185313	0.0515039	0.219805		1623.25	0.999617	0.998693	0.999511									1924.5	0.97258
1773	0.97312	0.99345	0.95957		1773	0.97513	0.99932	0.96154		1773	0.66257	0.89241	0.60933		1773	0.178768	0.0494356	0.215147		1623	0.999645	0.998696	0.999535									1924.25	0.97238
1772.75	0.97445	0.99337	0.96105		1772.75	0.97613	0.99782	0.96271		1772.75	0.67381	0.90292	0.61876		1772.75	0.171463	0.0443507	0.208478		1622.75	0.999672	0.998699	0.999558									1924	0.9724
1772.5	0.97509	0.993	0.96147		1772.5	0.97627	0.99621	0.96264		1772.5	0.67541	0.91439	0.61819		1772.5	0.170433	0.0388685	0.208878		1622.5	0.999699	0.998702	0.999581									1923.75	0.97166
1772.25	0.97517	0.99237	0.96135		1772.25	0.97578	0.99479	0.96195		1772.25	0.66988	0.92393	0.61259		1772.25	0.174003	0.0343609	0.21283		1622.25	0.999726	0.998706	0.999605									1923.5	0.97093
1772	0.9749	0.99164	0.96101		1772	0.97495	0.99368	0.96106		1772	0.66065	0.92856	0.60545		1772	0.180029	0.03219	0.217922		1622	0.999753	0.99871	0.999628									1923.25	0.97092
1771.75	0.97438	0.99102	0.96025		1771.75	0.97394	0.99274	0.95981		1771.75	0.64949	0.92503	0.59564		1771.75	0.187428	0.0338442	0.225016		1621.75	0.99978	0.998715	0.99965									1923	0.96983
1771.5	0.97401	0.9906	0.95953		1771.5	0.97322	0.99181	0.95875		1771.5	0.64171	0.9146	0.58736		1771.5	0.192661	0.0387688	0.231096		1621.5	0.999806	0.998721	0.999673									1922.75	0.96635
1771.25	0.97437	0.99027	0.95973		1771.25	0.97343	0.99089	0.95881		1771.25	0.64402	0.90259	0.58779		1771.25	0.191101	0.0445095	0.230778		1621.25	0.999832	0.998727	0.999695									1922.5	0.96344
1771	0.97529	0.98997	0.96105		1771	0.97446	0.99002	0.96022		1771	0.65518	0.8944	0.59885		1771	0.183639	0.0484682	0.222682		1621	0.999859	0.998733	0.999717									1922.25	0.96355
1770.75	0.97599	0.98966	0.96294		1770.75	0.97545	0.98922	0.96241		1770.75	0.66624	0.89195	0.61632		1770.75	0.176369	0.0496595	0.210194		1620.75	0.999884	0.99874	0.999739									1922	0.96604
1770.5	0.97614	0.98931	0.96403		1770.5	0.97603	0.9885	0.96392		1770.5	0.67271	0.89296	0.62863		1770.5	0.172172	0.049168	0.201605		1620.5	0.99991	0.998748	0.99976									1921.75	0.96866
1770.25	0.97596	0.98885	0.96309		1770.25	0.97632	0.98791	0.96345		1770.25	0.67595	0.89325	0.62475		1770.25	0.170085	0.049027	0.204294		1620.25	0.999935	0.998756	0.999781									1921.5	0.96976
1770	0.9747	0.98841	0.96053		1770	0.97565	0.98756	0.96147		1770	0.66848	0.8917	0.60873		1770	0.174912	0.0497812	0.215575		1620	0.99996	0.998764	0.999802									1921.25	0.96965
1769.75	0.97161	0.98826	0.95798		1769.75	0.97342	0.98771	0.95976		1769.75	0.64387	0.89008	0.59523		1769.75	0.191202	0.050571	0.225315		1619.75	0.999984	0.998773	0.999822									1921	0.97003
1769.5	0.96772	0.98843	0.9558		1769.5	0.97064	0.98832	0.95868		1769.5	0.61445	0.89006	0.58678		1769.5	0.211513	0.0505807	0.231525		1619.5	1.00001	0.998783	0.999842									1920.75	0.97128
1769.25	0.96447	0.98878	0.95323		1769.25	0.96866	0.98915	0.95737		1769.25	0.59432	0.89207	0.57678		1769.25	0.22598	0.0496011	0.23899		1619.25	1.00003	0.998793	0.999862									1920.5	0.97195
1769	0.96283	0.98931	0.95147		1769	0.96845	0.99027	0.95703		1769	0.59224	0.89505	0.57415		1769	0.227502	0.0481527	0.240975		1619	1.00005	0.998803	0.999881									1920.25	0.97158
1768.75	0.96389	0.99005	0.95329		1768.75	0.97105	0.99189	0.96037		1768.75	0.61876	0.89678	0.60003		1768.75	0.208478	0.0473141	0.221827		1618.75	1.00008	0.998814	0.999899									1920	0.97105
1768.5	0.96629	0.99074	0.95669		1768.5	0.97499	0.99372	0.96531		1768.5	0.66111	0.89541	0.64018		1768.5	0.179726	0.0479781	0.193698		1618.5	1.0001	0.998826	0.999917									1919.75	0.97112
1768.25	0.96564	0.99101	0.95485		1768.25	0.97536	0.99532	0.96446		1768.25	0.66522	0.89114	0.63308		1768.25	0.177035	0.0500541	0.198541		1618.25	1.00012	0.998838	0.999934									1919.5	0.97199
1768	0.96427	0.99073	0.95207		1768	0.974	0.99651	0.96168		1768	0.65014	0.88845	0.61042		1768	0.186993	0.051367	0.214371		1618	1.00014	0.99885	0.999951									1919.25	0.9728
1767.75	0.96542	0.98997	0.95332		1767.75	0.97432	0.99733	0.96211		1767.75	0.65372	0.89122	0.61391		1767.75	0.184608	0.0500151	0.211895		1617.75	1.00016	0.998863	0.999967									1919	0.97219
1767.5	0.96731	0.98923	0.95558		1767.5	0.97491	0.99814	0.96309		1767.5	0.66018	0.89975	0.62182		1767.5	0.180338	0.0458781	0.206335		1617.5	1.00017	0.998876	0.999983									1918.75	0.97042
1767.25	0.96842	0.98922	0.95645		1767.25	0.97456	0.99918	0.96251		1767.25	0.65631	0.91085	0.61712		1767.25	0.182891	0.0405531	0.20963		1617.25	1.00019	0.99889	0.999998									1918.5	0.96868
1767	0.9692	0.9899	0.95632		1767	0.97404	0.99989	0.96109		1767	0.65067	0.91992	0.60576		1767	0.186639	0.0362499	0.217699		1617	1.00021	0.998904	1.00001									1918.25	0.96739
1766.75	0.9701	0.99067	0.9562		1766.75	0.97398	0.99981	0.96002		1766.75	0.64993	0.92361	0.59724		1766.75	0.187133	0.0345114	0.223851		1616.75	1.00022	0.998919	1.00003									1918	0.96658
1766.5	0.97145	0.99126	0.95789		1766.5	0.97454	0.99905	0.96094		1766.5	0.65612	0.92234	0.60449		1766.5	0.183017	0.035109	0.218611		1616.5	1.00024	0.998934	1.00004									1917.75	0.96626
1766.25	0.97271	0.99159	0.96096		1766.25	0.97521	0.99787	0.96343		1766.25	0.66354	0.91816	0.62462		1766.25	0.178133	0.0370816	0.204384		1616.25	1.00025	0.998949	1.00005									1917.5	0.9664
1766	0.9722	0.99162	0.96155		1766	0.97464	0.99657	0.96396		1766	0.65723	0.91136	0.62898		1766	0.182283	0.04031	0.201363		1616	1.00027	0.998965	1.00006									1917.25	0.96802
1765.75	0.96973	0.99138	0.95852		1765.75	0.97268	0.99534	0.96144		1765.75	0.63596	0.90332	0.6085		1765.75	0.19657	0.0441584	0.215739		1615.75	1.00028	0.998981	1.00007									1917	0.9711
1765.5	0.96741	0.99089	0.95561		1765.5	0.97111	0.99404	0.95927		1765.5	0.61939	0.89893	0.59139		1765.5	0.208036	0.0462741	0.228126		1615.5	1.00029	0.998998	1.00008									1916.75	0.9725
1765.25	0.96715	0.99027	0.95553		1765.25	0.97139	0.99282	0.95973		1765.25	0.62234	0.90684	0.59498		1765.25	0.205972	0.0424693	0.225498		1615.25	1.0003	0.999015	1.00009									1916.5	0.97047
1765	0.96883	0.98989	0.95684		1765	0.97312	0.99237	0.96107		1765	0.64061	0.93454	0.6056		1765	0.193406	0.0294021	0.217814		1615	1.00031	0.999032	1.0001									1916.25	0.96865
1764.75	0.9702	0.98985	0.95722		1764.75	0.9742	0.99287	0.96117		1764.75	0.65241	0.97119	0.60632		1764.75	0.185479	0.0126958	0.217298		1614.75	1.00032	0.99905	1.00011									1916	0.96966
1764.5	0.96853	0.98992	0.95539		1764.5	0.97253	0.99371	0.95934		1764.5	0.63438	0.99216	0.59194		1764.5	0.197651	0.00341829	0.227722		1614.5	1.00033	0.999068	1.00012									1915.75	0.97105
1764.25	0.96465	0.98989	0.95236		1764.25	0.96926	0.99423	0.95691		1764.25	0.60039	0.98791	0.57329		1764.25	0.221567	0.00528262	0.241626		1614.25	1.00033	0.999086	1.00012									1915.5	0.97077
1764	0.96198	0.98992	0.95064		1764	0.96773	0.9943	0.95632		1764	0.58508	0.96973	0.56883		1764	0.232785	0.0133492	0.245018		1614	1.00034	0.999105	1.00013									1915.25	0.9706
1763.75	0.96206	0.99008	0.95133		1763.75	0.96928	0.99416	0.95848		1763.75	0.60062	0.95548	0.58523		1763.75	0.2214	0.0197784	0.232673		1613.75	1.00034	0.999124	1.00014									1915	0.97166
1763.5	0.96353	0.99026	0.95298		1763.5	0.97211	0.99436	0.96146		1763.5	0.62986	0.9507	0.60869		1763.5	0.200756	0.0219565	0.215604		1613.5	1.00035	0.999143	1.00014									1914.75	0.9725
1763.25	0.96469	0.99041	0.95381		1763.25	0.9737	0.99515	0.96273		1763.25	0.64697	0.94842	0.61889		1763.25	0.189116	0.0229993	0.208387		1613.25	1.00035	0.999163	1.00015									1914.5	0.97227
1763	0.96538	0.99053	0.95408		1763	0.97371	0.99645	0.96231		1763	0.647	0.94192	0.6155		1763	0.189096	0.025986	0.210772		1613	1.00035	0.999183	1.00015									1914.25	0.97185
1762.75	0.96637	0.99044	0.95464		1762.75	0.97323	0.99788	0.96141		1762.75	0.6418	0.93325	0.60825		1762.75	0.1926	0.030002	0.215918		1612.75	1.00035	0.999203	1.00015									1914	0.97174
1762.5	0.96826	0.98989	0.95592		1762.5	0.97332	0.9987	0.96092		1762.5	0.64282	0.92682	0.60435		1762.5	0.191911	0.0330046	0.218711		1612.5	1.00035	0.999224	1.00016									1913.75	0.97169
1762.25	0.97018	0.98929	0.95745		1762.25	0.97366	0.99853	0.96089		1762.25	0.64649	0.92417	0.60409		1762.25	0.189438	0.0342481	0.218898		1612.25	1.00035	0.999244	1.00016									1913.5	0.97163
1762	0.97103	0.98929	0.95843		1762	0.97345	0.99782	0.96082		1762	0.6442	0.92484	0.60357		1762	0.190979	0.0339334	0.219272		1612	1.00035	0.999265	1.00016									1913.25	0.9718
1761.75	0.97121	0.98966	0.95848		1761.75	0.97306	0.99668	0.9603		1761.75	0.64	0.9283	0.59948		1761.75	0.19382	0.0323116	0.222225		1611.75	1.00035	0.999286	1.00016									1913	0.97244
1761.5	0.97148	0.98986	0.95774		1761.5	0.97303	0.99503	0.95927		1761.5	0.63971	0.93319	0.59137		1761.5	0.194017	0.0300299	0.228141		1611.5	1.00035	0.999308	1.00016									1912.75	0.97362
1761.25	0.97157	0.98981	0.95737		1761.25	0.97288	0.99336	0.95866		1761.25	0.63809	0.93483	0.58668		1761.25	0.195118	0.0292674	0.231599		1611.25	1.00034	0.999329	1.00016									1912.5	0.97469
1761	0.97117	0.98962	0.95809		1761	0.97219	0.99208	0.9591		1761	0.63072	0.92833	0.59003		1761	0.200163	0.0322976	0.229126		1611	1.00034	0.999351	1.00017									1912.25	0.97477
1760.75	0.97119	0.98928	0.95876		1760.75	0.97199	0.99116	0.95955		1760.75	0.62861	0.91703	0.59357		1760.75	0.201619	0.0376165	0.226528		1610.75	1.00033	0.999372	1.00017									1912	0.974
1760.5	0.97202	0.98881	0.95829		1760.5	0.97283	0.99039	0.95909		1760.5	0.63758	0.91034	0.59002		1760.5	0.195465	0.0407964	0.229133		1610.5	1.00033	0.999394	1.00017									1911.75	0.97324
1760.25	0.97187	0.98821	0.95721		1760.25	0.97295	0.98954	0.95827		1760.25	0.63882	0.90986	0.58367		1760.25	0.194621	0.0410254	0.233833		1610.25	1.00032	0.999416	1.00017									1911.5	0.97282
1760	0.96971	0.98748	0.95627		1760	0.97125	0.98852	0.95779		1760	0.62082	0.91067	0.57994		1760	0.207034	0.040639	0.236617		1610	1.00032	0.999438	1.00017									1911.25	0.97255
1759.75	0.96802	0.98691	0.95618		1759.75	0.97011	0.98772	0.95824		1759.75	0.60899	0.90961	0.58339		1759.75	0.21539	0.0411448	0.234041		1609.75	1.00031	0.999459	1.00017									1911	0.9721
1759.5	0.96813	0.98672	0.95653		1759.5	0.97081	0.98755	0.95918		1759.5	0.61623	0.9047	0.59071		1759.5	0.210257	0.0434954	0.228626		1609.5	1.0003	0.999481	1.00016									1910.75	0.97124
1759.25	0.96645	0.98689	0.95481		1759.25	0.97004	0.98799	0.95836		1759.25	0.60836	0.89659	0.58431		1759.25	0.215839	0.0474061	0.233357		1609.25	1.0003	0.999503	1.00016									1910.5	0.97009
1759	0.96175	0.98734	0.95067		1759	0.96669	0.98891	0.95556		1759	0.57488	0.88732	0.56312		1759	0.240423	0.0519197	0.249399		1609	1.00029	0.999525	1.00016									1910.25	0.96885
1758.75	0.95783	0.98786	0.94735		1758.75	0.96449	0.98999	0.95394		1758.75	0.55389	0.87943	0.5512		1758.75	0.256576	0.0557987	0.258691		1608.75	1.00028	0.999546	1.00016									1910	0.96815
1758.5	0.95695	0.98837	0.94673		1758.5	0.9656	0.99111	0.95529		1758.5	0.56435	0.87413	0.56112		1758.5	0.248451	0.058424	0.250944		1608.5	1.00027	0.999568	1.00016									1909.75	0.96869
1758.25	0.95848	0.98915	0.94835		1758.25	0.96898	0.99282	0.95873		1758.25	0.59753	0.87	0.58723		1758.25	0.22364	0.0604807	0.231192		1608.25	1.00027	0.999589	1.00016									1909.5	0.96928
1758	0.9611	0.99019	0.95075		1758	0.97285	0.99528	0.96237		1758	0.63771	0.86616	0.61596		1758	0.195377	0.0624019	0.210447		1608	1.00026	0.999611	1.00016									1909.25	0.96889
1757.75	0.96266	0.99093	0.95131		1757.75	0.97502	0.99783	0.96352		1757.75	0.66144	0.8624	0.62537		1757.75	0.17951	0.0642913	0.203863		1607.75	1.00025	0.999632	1.00016									1909	0.9695
1757.5	0.96128	0.99086	0.94944		1757.5	0.97376	0.99982	0.96176		1757.5	0.64756	0.85802	0.61111		1757.5	0.18872	0.0665026	0.213881		1607.5	1.00024	0.999652	1.00016									1908.75	0.97169
1757.25	0.9588	0.98998	0.94812		1757.25	0.97111	1.0008	0.96029		1757.25	0.61934	0.85238	0.59941		1757.25	0.208071	0.0693667	0.222276		1607.25	1.00023	0.999673	1.00016									1908.5	0.97248
1757	0.95684	0.98882	0.94717		1757	0.96912	1.0009	0.95932		1757	0.59894	0.84693	0.59176		1757	0.222617	0.0721525	0.227854		1607	1.00022	0.999693	1.00016									1908.25	0.97036
1756.75	0.95513	0.98872	0.94504		1756.75	0.96776	1.0014	0.95754		1756.75	0.58533	0.8451	0.57804		1756.75	0.232599	0.0730919	0.238042		1606.75	1.00021	0.999714	1.00016									1908	0.96737
1756.5	0.95319	0.9903	0.94175		1756.5	0.96663	1.0032	0.95502		1756.5	0.57429	0.8472	0.55913		1756.5	0.240869	0.0720141	0.252487		1606.5	1.00021	0.999733	1.00016									1907.75	0.96575
1756.25	0.95106	0.99251	0.9386		1756.25	0.96572	1.0052	0.95307		1756.25	0.56555	0.8515	0.54487		1756.25	0.247529	0.0698153	0.263707		1606.25	1.0002	0.999753	1.00015									1907.5	0.96647
1756	0.94868	0.99433	0.93716		1756	0.96472	1.0071	0.953		1756	0.556	0.85801	0.54438		1756	0.254925	0.0665077	0.264098		1606	1.00019	0.999772	1.00015									1907.25	0.96858
1755.75	0.94569	0.9955	0.93834		1755.75	0.96281	1.0087	0.95533		1755.75	0.53827	0.8672	0.5614		1755.75	0.269	0.0618807	0.250728		1605.75	1.00018	0.999791	1.00015									1907	0.96995
1755.5	0.9445	0.99615	0.941		1755.5	0.9623	1.0102	0.95873		1755.5	0.53364	0.8758	0.5872		1755.5	0.272752	0.0575951	0.231214		1605.5	1.00017	0.99981	1.00015									1906.75	0.97007
1755.25	0.94823	0.99644	0.94143		1755.25	0.96652	1.0118	0.95958		1755.25	0.57323	0.87927	0.59384		1755.25	0.241671	0.0558777	0.226331		1605.25	1.00016	0.999828	1.00015									1906.5	0.97007
1755	0.95132	0.99627	0.94023		1755	0.96972	1.0131	0.95842		1755	0.60504	0.87569	0.58476		1755	0.218216	0.0576496	0.233022		1605	1.00015	0.999846	1.00015									1906.25	0.97067
1754.75	0.94987	0.99543	0.93983		1754.75	0.96791	1.0134	0.95768		1754.75	0.58683	0.86626	0.57911		1754.75	0.231488	0.0623517	0.237239		1604.75	1.00015	0.999864	1.00015									1906	0.97189
1754.5	0.94646	0.99429	0.939		1754.5	0.96391	1.013	0.95631		1754.5	0.54841	0.85701	0.56874		1754.5	0.260895	0.0670141	0.245086		1604.5	1.00014	0.999881	1.00015									1905.75	0.97289
1754.25	0.944	0.99363	0.93674		1754.25	0.96075	1.0128	0.95335		1754.25	0.51978	0.85692	0.54693		1754.25	0.28418	0.0670597	0.262068		1604.25	1.00013	0.999898	1.00016									1905.5	0.97258
1754	0.94427	0.994	0.93554		1754	0.96026	1.0132	0.95138		1754	0.51548	0.86532	0.5328		1754	0.287788	0.0628233	0.273436		1604	1.00012	0.999914	1.00016									1905.25	0.97191
1753.75	0.94771	0.99516	0.93803		1753.75	0.96289	1.0141	0.95306		1753.75	0.53908	0.875	0.54484		1753.75	0.268347	0.0579919	0.263731		1603.75	1.00012	0.999931	1.00016									1905	0.97263
1753.5	0.95197	0.99629	0.94189		1753.5	0.96638	1.0147	0.95615		1753.5	0.57189	0.88246	0.56751		1753.5	0.242687	0.054305	0.246026		1603.5	1.00011	0.999947	1.00016									1904.75	0.97377
1753.25	0.95462	0.99673	0.94434		1753.25	0.96826	1.0144	0.95783		1753.25	0.59031	0.88663	0.58031		1753.25	0.22892	0.0522576	0.23634		1603.25	1.0001	0.999962	1.00016									1904.5	0.97336
1753	0.95428	0.99616	0.94452		1753	0.96697	1.013	0.95708		1753	0.57758	0.88696	0.57459		1753	0.238388	0.052096	0.240642		1603	1.0001	0.999977	1.00016									1904.25	0.97202
1752.75	0.95207	0.99493	0.94332		1752.75	0.96351	1.0109	0.95466		1752.75	0.54477	0.88398	0.55646		1752.75	0.263787	0.0535576	0.254566		1602.75	1.00009	0.999992	1.00016									1904	0.97136
1752.5	0.95316	0.99386	0.94414		1752.5	0.96321	1.0089	0.95411		1752.5	0.54201	0.87777	0.5524		1752.5	0.265993	0.0566193	0.257746		1602.5	1.00009	1.00001	1.00017									1903.75	0.97159
1752.25	0.95812	0.99331	0.94732		1752.25	0.96692	1.0075	0.95602		1752.25	0.57713	0.86998	0.56659		1752.25	0.238726	0.0604907	0.246731		1602.25	1.00008	1.00002	1.00017									1903.5	0.97211
1752	0.96099	0.99258	0.94883		1752	0.96896	1.0058	0.9567		1752	0.59735	0.86517	0.57167		1752	0.223771	0.0628985	0.242855		1602	1.00008	1.00003	1.00017									1903.25	0.97217
1751.75	0.96034	0.99137	0.94795		1751.75	0.96797	1.0033	0.95548		1751.75	0.58747	0.86476	0.56257		1751.75	0.231014	0.0631044	0.249823		1601.75	1.00008	1.00005	1.00018									1903	0.97147
1751.5	0.9584	0.99031	0.94688		1751.5	0.96609	1.0008	0.95448		1751.5	0.56905	0.86554	0.55514		1751.5	0.24485	0.0627129	0.255597		1601.5	1.00007	1.00006	1.00018									1902.75	0.97111
1751.25	0.95706	0.98984	0.94674		1751.25	0.96514	0.99893	0.95473		1751.25	0.56	0.86515	0.55696		1751.25	0.251812	0.0629086	0.254176		1601.25	1.00007	1.00007	1.00018									1902.5	0.97197
1751	0.95647	0.98972	0.94639		1751	0.96538	0.99793	0.95521		1751	0.56224	0.86559	0.56052		1751	0.250078	0.0626878	0.251409		1601	1.00007	1.00009	1.00019									1902.25	0.9729
1750.75	0.9556	0.98971	0.94522		1750.75	0.96572	0.99758	0.95524		1750.75	0.56556	0.86756	0.56074		1750.75	0.247521	0.0617005	0.251238		1600.75	1.00007	1.0001	1.00019									1902	0.97282
1750.5	0.95264	0.98972	0.9433		1750.5	0.96423	0.99766	0.95477		1750.5	0.5514	0.86984	0.5573		1750.5	0.258533	0.0605606	0.253911		1600.5	1.00006	1.00011	1.00019									1901.75	0.97215
1750.25	0.94793	0.98969	0.94093		1750.25	0.96081	0.99804	0.95371		1750.25	0.52028	0.87173	0.54948		1750.25	0.283763	0.059618	0.260048		1600.25	1.00006	1.00012	1.0002									1901.5	0.97154
1750	0.94643	0.98961	0.93957		1750	0.95966	0.99883	0.95271		1750	0.51027	0.87318	0.54229		1750	0.2922	0.0588962	0.265768		1600	1.00006	1.00014	1.0002									1901.25	0.97146
1749.75	0.95149	0.98954	0.94143		1749.75	0.96376	1	0.95357		1749.75	0.54703	0.87204	0.54849		1749.75	0.261989	0.0594636	0.260831														1901	0.97189
1749.5	0.95839	0.98958	0.94567		1749.5	0.96885	1.0016	0.95599		1749.5	0.59623	0.86525	0.56638		1749.5	0.224586	0.0628584	0.246892														1900.75	0.97218
1749.25	0.96248	0.98977	0.94874		1749.25	0.97101	1.0032	0.95714		1749.25	0.61829	0.85774	0.57504		1749.25	0.208808	0.0666443	0.240302														1900.5	0.97219
1749	0.96355	0.99002	0.94937		1749	0.9704	1.0039	0.95612		1749	0.61206	0.85774	0.56735		1749	0.213206	0.0666443	0.246149														1900.25	0.97272
1748.75	0.96313	0.99019	0.94934		1748.75	0.96874	1.003	0.95487		1748.75	0.59512	0.8623	0.55803		1748.75	0.225395	0.0643416	0.253342														1900	0.97351
1748.5	0.96246	0.99006	0.95009		1748.5	0.96733	1.0009	0.9549		1748.5	0.58115	0.86482	0.55826		1748.5	0.235712	0.0630743	0.253163														1899.75	0.97309
1748.25	0.9625	0.98957	0.95119		1748.25	0.96707	0.99834	0.9557		1748.25	0.57856	0.8642	0.5642		1748.25	0.237652	0.0633857	0.248567														1899.5	0.97195
1748	0.96329	0.98882	0.95159		1748	0.96791	0.99585	0.95615		1748	0.58683	0.8618	0.56755		1748	0.231488	0.0645935	0.245996														1899.25	0.97219
1747.75	0.96237	0.98798	0.94976		1747.75	0.96744	0.99374	0.95476		1747.75	0.58224	0.85763	0.55722		1747.75	0.234898	0.0667	0.253973														1899	0.9734
1747.5	0.95822	0.98724	0.94538		1747.5	0.96415	0.99224	0.95123		1747.5	0.55071	0.8519	0.53175		1747.5	0.259077	0.0696114	0.274293														1898.75	0.97331
1747.25	0.9543	0.98666	0.94167		1747.25	0.96134	0.99134	0.94862		1747.25	0.52505	0.84448	0.51357		1747.25	0.279799	0.0734106	0.2894														1898.5	0.97221
1747	0.95461	0.98631	0.94201		1747	0.96292	0.99104	0.95021		1747	0.53935	0.83566	0.52457		1747	0.268129	0.0779704	0.280197														1898.25	0.97194
1746.75	0.95825	0.98641	0.94532		1746.75	0.96813	0.9916	0.95507		1746.75	0.58902	0.82888	0.55948		1746.75	0.22987	0.0815083	0.252215														1898	0.97214
1746.5	0.96046	0.98706	0.94691		1746.5	0.97203	0.99317	0.95832		1746.5	0.62906	0.82652	0.584		1746.5	0.201308	0.0827466	0.233587														1897.75	0.97154
1746.25	0.95871	0.98768	0.94459		1746.25	0.97111	0.99497	0.9568		1746.25	0.61936	0.82858	0.57247		1746.25	0.208057	0.0816656	0.242247														1897.5	0.97097
1746	0.95628	0.98751	0.9422		1746	0.96789	0.9961	0.95363		1746	0.58665	0.83405	0.54895		1746	0.231621	0.0788079	0.260467														1897.25	0.97167
1745.75	0.95726	0.98632	0.94389		1745.75	0.96705	0.99649	0.95354		1745.75	0.57842	0.84028	0.54831		1745.75	0.237757	0.075576	0.260974														1897	0.97233
1745.5	0.96021	0.98452	0.94751		1745.5	0.9681	0.99638	0.95529		1745.5	0.58877	0.84651	0.56116		1745.5	0.230054	0.0723679	0.250913														1896.75	0.97145
1745.25	0.96105	0.98315	0.94791		1745.25	0.96764	0.99587	0.95442		1745.25	0.58417	0.85599	0.55468		1745.25	0.233461	0.0675313	0.255957														1896.5	0.9704
1745	0.95905	0.98317	0.94502		1745	0.96519	0.99511	0.95108		1745	0.56049	0.869	0.53065		1745	0.251432	0.0609802	0.275192														1896.25	0.97064
1744.75	0.95636	0.98414	0.943		1744.75	0.96296	0.99421	0.9495		1744.75	0.53966	0.87828	0.51968		1744.75	0.26788	0.056367	0.284264														1896	0.97081
1744.5	0.95515	0.98518	0.94376		1744.5	0.9626	0.99328	0.95112		1744.5	0.53643	0.87742	0.53096		1744.5	0.270487	0.0567925	0.274938														1895.75	0.96955
1744.25	0.95721	0.98591	0.94589		1744.25	0.96498	0.99267	0.95357		1744.25	0.55851	0.86637	0.54848		1744.25	0.252969	0.0622966	0.260839														1895.5	0.96787
1744	0.9607	0.98621	0.9475		1744	0.96795	0.99253	0.95465		1744	0.58723	0.85202	0.55638		1744	0.231192	0.0695502	0.254628														1895.25	0.9667
1743.75	0.96176	0.98612	0.948		1743.75	0.96817	0.99292	0.95432		1743.75	0.58943	0.85079	0.55397		1743.75	0.229568	0.0701776	0.256514														1895	0.96553
1743.5	0.9606	0.98572	0.94766		1743.5	0.96628	0.99341	0.95327		1743.5	0.57086	0.87038	0.54629		1743.5	0.24347	0.0602911	0.262577														1894.75	0.96465
1743.25	0.95973	0.98519	0.94708		1743.25	0.96497	0.99319	0.95225		1743.25	0.55839	0.8984	0.53895		1743.25	0.253062	0.0465303	0.268452														1894.5	0.96603
1743	0.95943	0.9847	0.94664		1743	0.96464	0.99213	0.95178		1743	0.55531	0.92217	0.53566		1743	0.255465	0.035189	0.271111														1894.25	0.96912
1742.75	0.95845	0.98445	0.94638		1742.75	0.96412	0.99101	0.95198		1742.75	0.55042	0.93773	0.53703		1742.75	0.259306	0.0279222	0.270001														1894	0.97067
1742.5	0.95608	0.98438	0.94517		1742.5	0.9627	0.9902	0.95171		1742.5	0.53728	0.94648	0.53514		1742.5	0.269799	0.0238886	0.271533														1893.75	0.96984
1742.25	0.9521	0.9844	0.94168		1742.25	0.9601	0.98977	0.9496		1742.25	0.51412	0.95049	0.52034		1742.25	0.288936	0.0220524	0.283713														1893.5	0.96897
1742	0.94843	0.98468	0.93772		1742	0.95807	0.99003	0.94725		1742	0.49661	0.9481	0.50432		1742	0.303985	0.0231459	0.297294														1893.25	0.96935
1741.75	0.9487	0.98546	0.93747		1741.75	0.95999	0.99129	0.94862		1741.75	0.51314	0.93685	0.51363		1741.75	0.289764	0.0283299	0.28935														1893	0.97032
1741.5	0.95225	0.98651	0.94117		1741.5	0.96499	0.99334	0.95376		1741.5	0.55861	0.92158	0.5499		1741.5	0.252891	0.035467	0.259716														1892.75	0.97095
1741.25	0.95205	0.98736	0.94314		1741.25	0.96587	0.99567	0.95683		1741.25	0.56694	0.91291	0.57265		1741.25	0.246463	0.039572	0.242111														1892.5	0.97055
1741	0.94456	0.98752	0.93957		1741	0.95949	0.99756	0.95441		1741	0.50872	0.91785	0.55467		1741	0.293521	0.0372283	0.255965														1892.25	0.96956
1740.75	0.93453	0.98654	0.93283		1740.75	0.95158	0.99829	0.94984		1740.75	0.44438	0.93319	0.52203		1740.75	0.352245	0.0300299	0.282305														1892	0.96919
1740.5	0.9279	0.98444	0.92687		1740.5	0.9486	0.99762	0.94754		1740.5	0.42216	0.94845	0.50627		1740.5	0.374523	0.0229856	0.295618														1891.75	0.96957
1740.25	0.92949	0.98201	0.92443		1740.25	0.95469	0.99627	0.94949		1740.25	0.46871	0.95442	0.5196		1740.25	0.329096	0.0202605	0.284331														1891.5	0.97004
1740	0.94023	0.98084	0.92742		1740	0.96857	0.99634	0.95537		1740	0.59339	0.94672	0.56173		1740	0.22666	0.0237784	0.250472														1891.25	0.97027
1739.75	0.94195	0.98219	0.92944		1739.75	0.96979	1.0001	0.9569		1739.75	0.60571	0.9302	0.57321		1739.75	0.217735	0.0314237	0.241686														1891	0.97023
1739.5	0.94128	0.98574	0.93126		1739.5	0.96664	1.0077	0.95635		1739.5	0.57441	0.91602	0.56908		1739.5	0.240778	0.038095	0.244827														1890.75	0.96994
1739.25	0.94207	0.98947	0.93367		1739.25	0.96432	1.0163	0.95573		1739.25	0.5523	0.90874	0.56443		1739.25	0.257825	0.0415604	0.24839														1890.5	0.96945
1739	0.94308	0.99243	0.93385		1739	0.96169	1.0223	0.95228		1739	0.52815	0.89936	0.53918		1739	0.277243	0.0460664	0.268266														1890.25	0.96879
1738.75	0.94451	0.99403	0.93267		1738.75	0.95925	1.0234	0.94723		1738.75	0.50669	0.88383	0.50417		1738.75	0.295258	0.0536313	0.297423														1890	0.96787
1738.5	0.94808	0.99405	0.93502		1738.5	0.95927	1.0208	0.94605		1738.5	0.50683	0.87039	0.4963		1738.5	0.295138	0.0602861	0.304256														1889.75	0.9664
1738.25	0.95216	0.99279	0.93974		1738.25	0.96074	1.0162	0.94821		1738.25	0.51972	0.86457	0.51082		1738.25	0.284231	0.0631998	0.291732														1889.5	0.9642
1738	0.95331	0.9906	0.94147		1738	0.96069	1.0101	0.94876		1738	0.5193	0.86314	0.51458		1738	0.284582	0.0639188	0.288547														1889.25	0.96235
1737.75	0.95152	0.98797	0.93964		1737.75	0.9589	1.0034	0.94693		1737.75	0.50368	0.86303	0.50214		1737.75	0.297845	0.0639741	0.299175														1889	0.96281
1737.5	0.94916	0.98574	0.9373		1737.5	0.95712	0.99737	0.94516		1737.5	0.48857	0.86311	0.49043		1737.5	0.311073	0.0639339	0.309423														1888.75	0.96499
1737.25	0.94739	0.98439	0.93604		1737.25	0.95622	0.99326	0.94477		1737.25	0.48119	0.86267	0.48788		1737.25	0.317683	0.0641553	0.311687														1888.5	0.96728
1737	0.94637	0.98393	0.93618		1737	0.95646	0.99156	0.94616		1737	0.48312	0.86178	0.49703		1737	0.315945	0.0646036	0.303617														1888.25	0.96829
1736.75	0.94699	0.98406	0.93824		1736.75	0.9584	0.99169	0.94954		1736.75	0.49939	0.8609	0.51995		1736.75	0.30156	0.0650473	0.284038														1888	0.96775
1736.5	0.94972	0.98435	0.94097		1736.5	0.96155	0.99261	0.9527		1736.5	0.52693	0.8614	0.5422		1736.5	0.278247	0.0647951	0.26584														1887.75	0.96713
1736.25	0.95284	0.98446	0.94253		1736.25	0.96362	0.99364	0.95319		1736.25	0.54572	0.8637	0.54576		1736.25	0.26303	0.0636371	0.262998														1887.5	0.96737
1736	0.95582	0.98419	0.94382		1736	0.96453	0.99469	0.95242		1736	0.55428	0.86687	0.54021		1736	0.256271	0.062046	0.267437														1887.25	0.968
1735.75	0.95818	0.98341	0.94502		1735.75	0.96464	0.99526	0.95139		1735.75	0.55526	0.86893	0.53286		1735.75	0.255504	0.0610152	0.273387														1887	0.9686
1735.5	0.95928	0.98228	0.9458		1735.5	0.96379	0.99452	0.95024		1735.5	0.5473	0.86729	0.52482		1735.5	0.261775	0.0618357	0.27999														1886.75	0.9693
1735.25	0.96009	0.98124	0.9464		1735.25	0.96315	0.99233	0.94941		1735.25	0.54146	0.86126	0.51905		1735.25	0.266434	0.0648657	0.284791														1886.5	0.96997
1735	0.96157	0.9805	0.94708		1735	0.9637	0.98944	0.94918		1735	0.54648	0.85193	0.51746		1735	0.262426	0.0695961	0.286123														1886.25	0.97026
1734.75	0.96283	0.98006	0.9479		1734.75	0.96432	0.98667	0.94937		1734.75	0.55229	0.84175	0.51875		1734.75	0.257833	0.0748169	0.285042														1886	0.97025
1734.5	0.96289	0.97979	0.94869		1734.5	0.96382	0.9844	0.94961		1734.5	0.54763	0.83282	0.52038		1734.5	0.261513	0.0794489	0.283679														1885.75	0.97045
1734.25	0.96224	0.9796	0.94875		1734.25	0.96279	0.98272	0.94929		1734.25	0.53812	0.82588	0.51822		1734.25	0.269121	0.0830831	0.285486														1885.5	0.97046
1734	0.96175	0.97934	0.94778		1734	0.96221	0.98152	0.94823		1734	0.53284	0.82167	0.51096		1734	0.273403	0.0853026	0.291613														1885.25	0.96948
1733.75	0.96205	0.9788	0.94695		1733.75	0.96257	0.98031	0.94747		1733.75	0.53615	0.82285	0.50577		1733.75	0.270714	0.0846793	0.296047														1885	0.9682
1733.5	0.96318	0.97787	0.94726		1733.5	0.96372	0.97882	0.94779		1733.5	0.54664	0.8306	0.50792		1733.5	0.262299	0.0806081	0.294205														1884.75	0.968
1733.25	0.96393	0.9768	0.94807		1733.25	0.96427	0.97735	0.94841		1733.25	0.5518	0.83811	0.51214		1733.25	0.258218	0.076699	0.290611														1884.5	0.96881
1733	0.96352	0.97592	0.94846		1733	0.96345	0.97638	0.94839		1733	0.54416	0.83599	0.51201		1733	0.264273	0.0777989	0.290722														1884.25	0.96958
1732.75	0.96305	0.97549	0.9482		1732.75	0.96256	0.97602	0.94771		1732.75	0.536	0.82174	0.5074		1732.75	0.270835	0.0852656	0.29465														1884	0.96985
1732.5	0.96342	0.97554	0.94759		1732.5	0.96269	0.97608	0.94687		1732.5	0.5372	0.80068	0.50176		1732.5	0.269864	0.096541	0.299504														1883.75	0.96972
1732.25	0.96413	0.97564	0.94739		1732.25	0.96328	0.97599	0.94656		1732.25	0.54265	0.78497	0.49969		1732.25	0.26548	0.105147	0.301299														1883.5	0.96944
1732	0.96451	0.97542	0.94801		1732	0.96358	0.97534	0.94709		1732	0.54541	0.78523	0.50326		1732	0.263277	0.105003	0.298208														1883.25	0.96931
1731.75	0.96427	0.97496	0.94901		1731.75	0.96328	0.97446	0.94803		1731.75	0.54258	0.79634	0.5096		1731.75	0.265536	0.0989015	0.292771														1883	0.96926
1731.5	0.9633	0.97451	0.94946		1731.5	0.96234	0.97377	0.94852		1731.5	0.53407	0.80835	0.51289		1731.5	0.272402	0.0924006	0.289976														1882.75	0.96915
1731.25	0.96189	0.97427	0.94833		1731.25	0.96118	0.97342	0.94762		1731.25	0.52356	0.81693	0.5068		1731.25	0.281034	0.0878152	0.295163														1882.5	0.96933
1731	0.9603	0.97431	0.94612		1731	0.96013	0.97337	0.94595		1731	0.51434	0.82053	0.49565		1731	0.28875	0.0859055	0.304825														1882.25	0.97
1730.75	0.95811	0.97444	0.94453		1730.75	0.95882	0.97344	0.94523		1730.75	0.50299	0.81945	0.4909		1730.75	0.298441	0.0864775	0.309007														1882	0.97031
1730.5	0.95588	0.97448	0.94416		1730.5	0.95763	0.97352	0.94589		1730.5	0.49292	0.81475	0.49525		1730.5	0.307224	0.0889756	0.305176														1881.75	0.96988
1730.25	0.95612	0.97447	0.94425		1730.25	0.9587	0.97374	0.94679		1730.25	0.50194	0.80844	0.50124		1730.25	0.299348	0.0923522	0.299954														1881.5	0.9699
1730	0.95809	0.97443	0.94368		1730	0.96096	0.97426	0.9465		1730	0.52167	0.80281	0.49931		1730	0.282604	0.0953872	0.30163														1881.25	0.97087
1729.75	0.95757	0.97439	0.94205		1729.75	0.96025	0.97511	0.94469		1729.75	0.51542	0.79986	0.48733		1729.75	0.287839	0.096986	0.312177														1881	0.97127
1729.5	0.95591	0.97439	0.94087		1729.5	0.95819	0.97618	0.94311		1729.5	0.4976	0.79905	0.47718		1729.5	0.30312	0.097426	0.321318														1880.75	0.97031
1729.25	0.95678	0.97443	0.94167		1729.25	0.95869	0.97706	0.94356		1729.25	0.5019	0.79927	0.48002		1729.25	0.299383	0.0973065	0.318741														1880.5	0.9691
1729	0.95847	0.97451	0.94323		1729	0.96022	0.97743	0.94496		1729	0.51515	0.80252	0.48909		1729	0.288066	0.0955441	0.310611														1880.25	0.96868
1728.75	0.9576	0.97464	0.94342		1728.75	0.9594	0.97737	0.94519		1728.75	0.50797	0.81163	0.49062		1728.75	0.294162	0.0906419	0.309255														1880	0.96912
1728.5	0.9556	0.97481	0.94235		1728.5	0.9576	0.97713	0.94433		1728.5	0.49267	0.82408	0.48501		1728.5	0.307444	0.0840306	0.314249														1879.75	0.96989
1728.25	0.95549	0.97494	0.94127		1728.25	0.95775	0.9769	0.94349		1728.25	0.49388	0.83429	0.47961		1728.25	0.306379	0.078683	0.319112														1879.5	0.97004
1728	0.95675	0.97493	0.94069		1728	0.95905	0.9767	0.94294		1728	0.50497	0.83614	0.47611		1728	0.296734	0.077721	0.322293														1879.25	0.96931
1727.75	0.95741	0.97465	0.94059		1727.75	0.9594	0.97647	0.94255		1727.75	0.50802	0.82446	0.47358		1727.75	0.294119	0.0838304	0.324607														1879	0.96834
1727.5	0.9574	0.97411	0.94097		1727.5	0.95897	0.97615	0.94251		1727.5	0.50423	0.79979	0.47335		1727.5	0.297371	0.097024	0.324818														1878.75	0.96805
1727.25	0.95704	0.97341	0.94146		1727.25	0.95842	0.97571	0.94281		1727.25	0.49954	0.77212	0.47526		1727.25	0.30143	0.112315	0.323069														1878.5	0.96907
1727	0.95601	0.97278	0.94095		1727	0.95764	0.97512	0.94255		1727	0.49296	0.75906	0.47362		1727	0.307188	0.119724	0.32457														1878.25	0.97021
1726.75	0.95422	0.97239	0.93893		1726.75	0.95658	0.97442	0.94126		1726.75	0.48416	0.77405	0.46549		1726.75	0.315011	0.111231	0.33209														1878	0.96963
1726.5	0.95168	0.97221	0.9366		1726.5	0.95514	0.9738	0.94		1726.5	0.47234	0.81493	0.45767		1726.5	0.325745	0.0888797	0.339448														1877.75	0.9687
1726.25	0.94862	0.97216	0.93506		1726.25	0.95335	0.97355	0.93971		1726.25	0.45807	0.85993	0.45591		1726.25	0.339068	0.0655369	0.341121														1877.5	0.9699
1726	0.94621	0.97236	0.93424		1726	0.95222	0.97402	0.94017		1726	0.4493	0.89733	0.45869		1726	0.347464	0.0470478	0.338481														1877.25	0.9711
1725.75	0.9453	0.97288	0.93347		1725.75	0.95267	0.97529	0.94076		1725.75	0.45281	0.91821	0.46234		1725.75	0.344084	0.037058	0.335039														1877	0.96934
1725.5	0.94466	0.97363	0.93166		1725.5	0.95404	0.97717	0.94091		1725.5	0.46353	0.91854	0.46328		1725.5	0.333922	0.0369019	0.334156														1876.75	0.96756
1725.25	0.94173	0.97439	0.92773		1725.25	0.95412	0.97924	0.93993		1725.25	0.46417	0.90204	0.45723		1725.25	0.333323	0.0447742	0.339865														1876.5	0.96932
1725	0.93542	0.97473	0.92227		1725	0.95146	0.98092	0.93809		1725	0.44345	0.87409	0.44603		1725	0.353155	0.0584438	0.350636														1876.25	0.97179
1724.75	0.92781	0.97444	0.91767		1724.75	0.94715	0.98204	0.9368		1724.75	0.41179	0.84166	0.43835		1724.75	0.385324	0.0748633	0.358179														1876	0.97141
1724.5	0.92282	0.97424	0.91688		1724.5	0.94401	0.98391	0.93793		1724.5	0.39001	0.81495	0.44507		1724.5	0.408924	0.088869	0.351572														1875.75	0.96951
1724.25	0.92286	0.97525	0.92243		1724.25	0.94431	0.98807	0.94386		1724.25	0.39204	0.79912	0.482		1724.25	0.40667	0.097388	0.316953														1875.5	0.96846
1724	0.9272	0.97759	0.92953		1724	0.94867	0.99435	0.95105		1724	0.42271	0.79393	0.53047		1724	0.373957	0.100218	0.275339														1875.25	0.96859
1723.75	0.92988	0.98046	0.92576		1723.75	0.95162	1.0009	0.9474		1723.75	0.44472	0.79539	0.50535		1723.75	0.351913	0.0994199	0.296408														1875	0.96942
1723.5	0.93188	0.98253	0.92081		1723.5	0.95338	1.0051	0.94206		1723.5	0.45835	0.79873	0.47052		1723.5	0.338803	0.0976	0.327422														1874.75	0.96973
1723.25	0.93226	0.98245	0.91738		1723.25	0.95322	1.0053	0.938		1723.25	0.45705	0.79994	0.44552		1723.25	0.340036	0.0969426	0.351133														1874.5	0.96893
1723	0.92981	0.9805	0.91479		1723	0.95032	1.0032	0.93497		1723	0.43484	0.79689	0.42766		1723	0.361671	0.0986016	0.368901														1874.25	0.96805
1722.75	0.92574	0.97903	0.91261		1722.75	0.94615	1.0019	0.93274		1722.75	0.40474	0.78794	0.41494		1722.75	0.392824	0.103507	0.382015														1874	0.96812
1722.5	0.92045	0.9791	0.91008		1722.5	0.94127	1.0017	0.93066		1722.5	0.37194	0.77513	0.40344		1722.5	0.429527	0.110625	0.394221														1873.75	0.96925
1722.25	0.91581	0.98003	0.90806		1722.25	0.93729	1.0021	0.92936		1722.25	0.34704	0.76345	0.39639		1722.25	0.45962	0.117219	0.401877														1873.5	0.97056
1722	0.91783	0.9811	0.9099		1722	0.93984	1.0027	0.93172		1722	0.36283	0.75537	0.40927		1722	0.440297	0.12184	0.38799														1873.25	0.97044
1721.75	0.92396	0.98198	0.91394		1721.75	0.94644	1.0036	0.93617		1721.75	0.40672	0.75053	0.43465		1721.75	0.390704	0.124632	0.36186														1873	0.96904
1721.5	0.92432	0.98247	0.91465		1721.5	0.94735	1.0047	0.93744		1721.5	0.4132	0.74763	0.44215		1721.5	0.38384	0.126313	0.35443														1872.75	0.96845
1721.25	0.92218	0.98222	0.91377		1721.25	0.94543	1.0053	0.93681		1721.25	0.39973	0.74553	0.43841		1721.25	0.398233	0.127535	0.35812														1872.5	0.96915
1721	0.92302	0.98102	0.91437		1721	0.94555	1.0045	0.93669		1721	0.40056	0.74276	0.43772		1721	0.397332	0.129151	0.358804														1872.25	0.96968
1720.75	0.92856	0.97971	0.91736		1720.75	0.94887	1.0035	0.93743		1720.75	0.42416	0.73688	0.44208		1720.75	0.37247	0.132603	0.354499														1872	0.96942
1720.5	0.93441	0.97939	0.9204		1720.5	0.95133	1.0038	0.93706		1720.5	0.44249	0.72703	0.43992		1720.5	0.354097	0.138448	0.356626														1871.75	0.96871
1720.25	0.93745	0.97958	0.92232		1720.25	0.95107	1.0043	0.93572		1720.25	0.44052	0.71571	0.43203		1720.25	0.356034	0.145263	0.364486														1871.5	0.96831
1720	0.93916	0.97918	0.92399		1720	0.95029	1.0031	0.93494		1720	0.43463	0.70656	0.42749		1720	0.36188	0.150851	0.369074														1871.25	0.96879
1719.75	0.94025	0.97768	0.9252		1719.75	0.94954	0.99906	0.93434		1719.75	0.42908	0.70214	0.42406		1719.75	0.367462	0.153576	0.372573														1871	0.96886
1719.5	0.94117	0.97555	0.92585		1719.5	0.94887	0.99321	0.93343		1719.5	0.42419	0.70267	0.41886		1719.5	0.37244	0.153249	0.377931														1870.75	0.96662
1719.25	0.94277	0.97361	0.92717		1719.25	0.94893	0.98775	0.93323		1719.25	0.42458	0.70369	0.41774		1719.25	0.37204	0.152619	0.379094														1870.5	0.9636
1719	0.94509	0.97223	0.92935		1719	0.94962	0.98375	0.9338		1719	0.42966	0.7014	0.42098		1719	0.366875	0.154034	0.375739														1870.25	0.96285
1718.75	0.94713	0.97112	0.93059		1718.75	0.95001	0.98072	0.93342		1718.75	0.43259	0.69674	0.4188		1718.75	0.363924	0.156929	0.377993														1870	0.96285
1718.5	0.94824	0.96995	0.93045		1718.5	0.94973	0.97789	0.9319		1718.5	0.43046	0.69215	0.41028		1718.5	0.366067	0.1598	0.38692														1869.75	0.96097
1718.25	0.94845	0.96883	0.93069		1718.25	0.94919	0.97517	0.93142		1718.25	0.42653	0.68976	0.40761		1718.25	0.37005	0.161302	0.389755														1869.5	0.95884
1718	0.94791	0.96781	0.93169		1718	0.94871	0.97245	0.93248		1718	0.42299	0.69015	0.41349		1718	0.37367	0.161057	0.383535														1869.25	0.95937
1717.75	0.94677	0.96678	0.93172		1717.75	0.94812	0.96972	0.93304		1717.75	0.41871	0.69147	0.41667		1717.75	0.378087	0.160227	0.380208														1869	0.96071
1717.5	0.9454	0.96578	0.93027		1717.5	0.94755	0.9673	0.93238		1717.5	0.41462	0.69192	0.41293		1717.5	0.38235	0.159944	0.384124														1868.75	0.95862
1717.25	0.94449	0.96513	0.92857		1717.25	0.94754	0.96589	0.93157		1717.25	0.41457	0.69176	0.40846		1717.25	0.382402	0.160045	0.38885														1868.5	0.95532
1717	0.9445	0.96492	0.92778		1717	0.94837	0.96574	0.93158		1717	0.4205	0.69135	0.40849		1717	0.376234	0.160302	0.388819														1868.25	0.95308
1716.75	0.94523	0.965	0.92835		1716.75	0.94954	0.96637	0.93259		1716.75	0.42911	0.69097	0.41412		1716.75	0.367431	0.160541	0.382874														1868	0.95123
1716.5	0.94584	0.96512	0.92949		1716.5	0.9501	0.96731	0.93368		1716.5	0.43327	0.69098	0.4203		1716.5	0.363241	0.160535	0.376441														1867.75	0.95008
1716.25	0.94578	0.96505	0.92991		1716.25	0.9497	0.96817	0.93377		1716.25	0.43024	0.69139	0.42076		1716.25	0.366289	0.160277	0.375966														1867.5	0.95269
1716	0.94567	0.96473	0.93004		1716	0.94916	0.96869	0.93347		1716	0.42625	0.69221	0.41906		1716	0.370336	0.159762	0.377724														1867.25	0.95743
1715.75	0.94633	0.96442	0.93082		1715.75	0.9494	0.96882	0.93384		1715.75	0.42805	0.69353	0.4212		1715.75	0.368505	0.158935	0.375512														1867	0.95904
1715.5	0.94708	0.96415	0.93113		1715.5	0.94979	0.96851	0.9338		1715.5	0.43094	0.69523	0.42095		1715.5	0.365583	0.157871	0.375769														1866.75	0.95762
1715.25	0.94674	0.96372	0.92945		1715.25	0.94915	0.96771	0.93182		1715.25	0.42622	0.69658	0.40983		1715.25	0.370366	0.157029	0.387396														1866.5	0.95574
1715	0.94592	0.96311	0.92751		1715	0.94819	0.96666	0.92973		1715	0.41922	0.6964	0.39837		1715	0.377558	0.157141	0.399713														1866.25	0.95534
1714.75	0.9456	0.96248	0.92749		1714.75	0.94802	0.9656	0.92987		1714.75	0.418	0.69355	0.39913		1714.75	0.378824	0.158922	0.398886														1866	0.95708
1714.5	0.9445	0.96198	0.92773		1714.5	0.94758	0.96474	0.93076		1714.5	0.4148	0.68811	0.40396		1714.5	0.382161	0.162342	0.393662														1865.75	0.96005
1714.25	0.94107	0.96179	0.92567		1714.25	0.94542	0.96424	0.92995		1714.25	0.39962	0.68114	0.39954		1714.25	0.398353	0.166764	0.39844														1865.5	0.96294
1714	0.93625	0.96176	0.92167		1714	0.94218	0.96407	0.9275		1714	0.37782	0.67489	0.38648		1714	0.422715	0.170767	0.412873														1865.25	0.9649
1713.75	0.93246	0.96174	0.91791		1713.75	0.93984	0.9642	0.92518		1713.75	0.36277	0.67106	0.37441		1713.75	0.440369	0.173239	0.426653														1865	0.96544
1713.5	0.93083	0.96168	0.91621		1713.5	0.93945	0.96482	0.92471		1713.5	0.36036	0.66927	0.37201		1713.5	0.443263	0.174399	0.429445														1864.75	0.96528
1713.25	0.9314	0.96166	0.91781		1713.25	0.94112	0.9661	0.92739		1713.25	0.37096	0.66874	0.38588		1713.25	0.430673	0.174743	0.413548														1864.5	0.96559
1713	0.93389	0.9618	0.92195		1713	0.94441	0.96788	0.93234		1713	0.39275	0.67073	0.41272		1713	0.405884	0.173452	0.384344														1864.25	0.96629
1712.75	0.93516	0.9622	0.92331		1712.75	0.94604	0.96981	0.93406		1712.75	0.40398	0.67586	0.42244		1712.75	0.39364	0.170143	0.374235														1864	0.96669
1712.5	0.93419	0.96261	0.92172		1712.5	0.94524	0.97153	0.93262		1712.5	0.39842	0.68337	0.41429		1712.5	0.399659	0.165344	0.382696														1863.75	0.96655
1712.25	0.93231	0.96264	0.91963		1712.25	0.94364	0.97268	0.93081		1712.25	0.38756	0.69099	0.40426		1712.25	0.411661	0.160528	0.393339														1863.5	0.96607
1712	0.9292	0.96248	0.91642		1712	0.94111	0.97333	0.92817		1712	0.3709	0.69445	0.38999		1712	0.430743	0.158359	0.408947														1863.25	0.96629
1711.75	0.9251	0.96262	0.91206		1711.75	0.93796	0.97383	0.92474		1711.75	0.35113	0.69143	0.37218		1711.75	0.454532	0.160252	0.429247														1863	0.96792
1711.5	0.92298	0.96307	0.90925		1711.5	0.93714	0.97446	0.92319		1711.5	0.34611	0.68948	0.36438		1711.5	0.460786	0.161478	0.438445														1862.75	0.96934
1711.25	0.92541	0.96364	0.91048		1711.25	0.94069	0.97536	0.92552		1711.25	0.36822	0.6997	0.37614		1711.25	0.433893	0.155088	0.42465														1862.5	0.96898
1711	0.92714	0.96411	0.91175		1711	0.94233	0.97647	0.92668		1711	0.3788	0.72397	0.38218		1711	0.42159	0.140279	0.417732														1862.25	0.9682
1710.75	0.92587	0.96429	0.91103		1710.75	0.93945	0.9777	0.92439		1710.75	0.36036	0.75492	0.37041		1710.75	0.443263	0.122099	0.431317														1862	0.96839
1710.5	0.92799	0.96404	0.91312		1710.5	0.93941	0.97882	0.92437		1710.5	0.3601	0.77788	0.37029		1710.5	0.443577	0.109087	0.431458														1861.75	0.96795
1710.25	0.93169	0.96336	0.91619		1710.25	0.9414	0.97927	0.92574		1710.25	0.37279	0.77697	0.3773		1710.25	0.428536	0.109596	0.423313														1861.5	0.96584
1710	0.93184	0.96268	0.91572		1710	0.94083	0.97845	0.92455		1710	0.36907	0.7553	0.37123		1710	0.432891	0.121881	0.430357														1861.25	0.96447
1709.75	0.92919	0.96228	0.91271		1709.75	0.93821	0.9764	0.92157		1709.75	0.35265	0.73933	0.35638		1709.75	0.452656	0.131162	0.448087														1861	0.96543
1709.5	0.92813	0.96188	0.91148		1709.5	0.93733	0.97373	0.92052		1709.5	0.34728	0.74008	0.35128		1709.5	0.45932	0.130721	0.454347														1860.75	0.96659
1709.25	0.92858	0.96136	0.91223		1709.25	0.93795	0.97138	0.92144		1709.25	0.35108	0.75017	0.35574		1709.25	0.454594	0.12484	0.448867														1860.5	0.96639
1709	0.92764	0.96079	0.91223		1709	0.93728	0.97006	0.92171		1709	0.34696	0.76196	0.35707		1709	0.459721	0.118068	0.447247														1860.25	0.96589
1708.75	0.92453	0.96034	0.91045		1708.75	0.93458	0.96966	0.92035		1708.75	0.33103	0.77178	0.35046		1708.75	0.480133	0.112506	0.455362														1860	0.96592
1708.5	0.91968	0.96017	0.90702		1708.5	0.93034	0.96969	0.91753		1708.5	0.3073	0.77728	0.33715		1708.5	0.512437	0.109423	0.472177														1859.75	0.96611
1708.25	0.91515	0.96025	0.90352		1708.25	0.92648	0.96995	0.91471		1708.25	0.28713	0.77445	0.32427		1708.25	0.541921	0.111007	0.489093														1859.5	0.96623
1708	0.9151	0.96038	0.9032		1708	0.92697	0.97036	0.91491		1708	0.28961	0.76102	0.32519		1708	0.538186	0.118604	0.487863														1859.25	0.96634
1707.75	0.92029	0.96036	0.90634		1707.75	0.93262	0.9708	0.91849		1707.75	0.31985	0.74676	0.34164		1707.75	0.495054	0.126819	0.466431														1859	0.96607
1707.5	0.92588	0.96013	0.90887		1707.5	0.9389	0.97126	0.92164		1707.5	0.35689	0.74328	0.35673		1707.5	0.447466	0.128848	0.44766														1858.75	0.96483
1707.25	0.93045	0.95974	0.9101		1707.25	0.94409	0.97163	0.92344		1707.25	0.39056	0.74535	0.36561		1707.25	0.408312	0.12764	0.436982														1858.5	0.96346
1707	0.93861	0.95932	0.91502		1707	0.95208	0.97175	0.92815		1707	0.44823	0.74094	0.38989		1707	0.348499	0.130217	0.409058														1858.25	0.96388
1706.75	0.95417	0.95879	0.92919		1706.75	0.96619	0.97165	0.9409		1706.75	0.57006	0.72497	0.46321		1706.75	0.244079	0.13968	0.334222														1858	0.96572
1706.5	0.96752	0.95783	0.94708		1706.5	0.97847	0.97129	0.9578		1706.5	0.70066	0.70274	0.58003		1706.5	0.154493	0.153205	0.23655														1857.75	0.96696
1706.25	0.94399	0.95624	0.93302		1706.25	0.95705	0.97026	0.94593		1706.25	0.48806	0.68309	0.49551		1706.25	0.311527	0.165522	0.304948														1857.5	0.96721
1706	0.91534	0.95405	0.90742		1706	0.93146	0.96774	0.9234		1706	0.31339	0.66948	0.36542		1706	0.503915	0.174262	0.437208														1857.25	0.96714
1705.75	0.90949	0.95171	0.89748		1705.75	0.92703	0.96371	0.91478		1705.75	0.28989	0.65865	0.32461		1705.75	0.537767	0.181345	0.488638														1857	0.9672
1705.5	0.91374	0.95125	0.89681		1705.5	0.93118	0.96201	0.91393		1705.5	0.31189	0.64743	0.3208		1705.5	0.505999	0.188807	0.493766														1856.75	0.96757
1705.25	0.91552	0.95427	0.89832		1705.25	0.93235	0.96748	0.91484		1705.25	0.31835	0.6369	0.32487		1705.25	0.497095	0.195929	0.48829														1856.5	0.96755
1705	0.91318	0.95797	0.89952		1705	0.92939	0.97484	0.91548		1705	0.3022	0.62739	0.32777		1705	0.519706	0.202462	0.484431														1856.25	0.96651
1704.75	0.91068	0.95967	0.90035		1704.75	0.92647	0.97817	0.91597		1704.75	0.28707	0.61791	0.32996		1704.75	0.542012	0.209075	0.481539														1856	0.966
1704.5	0.90928	0.95971	0.90055		1704.5	0.92511	0.97803	0.91623		1704.5	0.28024	0.60893	0.33116		1704.5	0.55247	0.215433	0.479962														1855.75	0.96731
1704.25	0.90792	0.95912	0.89923		1704.25	0.92445	0.97676	0.91561		1704.25	0.27702	0.60308	0.32835		1704.25	0.557489	0.219625	0.483663														1855.5	0.96867
1704	0.90597	0.95835	0.89649		1704	0.92388	0.97536	0.91421		1704	0.27423	0.60122	0.32205		1704	0.561885	0.220967	0.492077														1855.25	0.9683
1703.75	0.90317	0.95769	0.893		1703.75	0.92273	0.9743	0.91234		1703.75	0.26871	0.60191	0.31385		1703.75	0.570716	0.220468	0.503278														1855	0.96732
1703.5	0.89938	0.95724	0.88938		1703.5	0.92036	0.97391	0.91012		1703.5	0.25763	0.60302	0.30431		1703.5	0.589004	0.219668	0.516684														1854.75	0.96705
1703.25	0.89559	0.95707	0.88734		1703.25	0.91716	0.97451	0.9087		1703.25	0.24337	0.6024	0.29837		1703.25	0.613733	0.220115	0.525245														1854.5	0.96726
1703	0.8935	0.95731	0.88779		1703	0.9149	0.97624	0.90906		1703	0.23377	0.59956	0.29987		1703	0.631211	0.222167	0.523067														1854.25	0.96749
1702.75	0.8961	0.9581	0.8896		1702.75	0.9174	0.97886	0.91075		1702.75	0.24444	0.59677	0.30699		1702.75	0.611828	0.224193	0.512876														1854	0.9675
1702.5	0.90688	0.9589	0.8935		1702.5	0.93422	0.98126	0.91509		1702.5	0.32891	0.59444	0.32599		1702.5	0.482923	0.225892	0.486796														1853.75	0.96741
1702.25	0.92138	0.95845	0.90289		1702.25	0.94402	0.98153	0.92508		1702.25	0.3901	0.59064	0.37389		1702.25	0.408824	0.228677	0.427256														1853.5	0.96798
1702	0.92265	0.95602	0.90868		1702	0.94364	0.97892	0.92936		1702	0.38755	0.58535	0.39636		1702	0.411672	0.232584	0.40191														1853.25	0.96908
1701.75	0.91497	0.95196	0.90529		1701.75	0.93247	0.97459	0.9226		1701.75	0.31899	0.57987	0.36146		1701.75	0.496223	0.236669	0.44194														1853	0.96922
1701.5	0.91269	0.94804	0.9015		1701.5	0.92722	0.97094	0.91585		1701.5	0.29086	0.57566	0.32942		1701.5	0.536316	0.239834	0.48225														1852.75	0.9682
1701.25	0.91573	0.94729	0.89956		1701.25	0.92837	0.97057	0.91199		1701.25	0.29686	0.57399	0.31229		1701.25	0.527448	0.241096	0.505442														1852.5	0.96752
1701	0.91911	0.94918	0.89984		1701	0.93022	0.97079	0.91071		1701	0.30664	0.57376	0.30684		1701	0.513371	0.24127	0.513088														1852.25	0.96772
1700.75	0.92001	0.95002	0.90203		1700.75	0.92939	0.96818	0.91123		1700.75	0.30222	0.57356	0.30903		1700.75	0.519677	0.241421	0.509999														1852	0.96799
1700.5	0.92	0.94919	0.90413		1700.5	0.92749	0.96429	0.91149		1700.5	0.29229	0.57309	0.31016		1700.5	0.534186	0.241777	0.508414														1851.75	0.96795
1700.25	0.92081	0.94759	0.90486		1700.25	0.92641	0.96068	0.91037		1700.25	0.28675	0.5729	0.30537		1700.25	0.542497	0.241921	0.515174														1851.5	0.96784
1700	0.92231	0.9461	0.90551		1700	0.92627	0.95754	0.9094		1700	0.28603	0.57407	0.30128		1700	0.543588	0.241035	0.52103														1851.25	0.96768
1699.75	0.92393	0.94508	0.90698		1699.75	0.92667	0.95472	0.90967		1699.75	0.28807	0.57747	0.30241		1699.75	0.540502	0.238471	0.519404														1851	0.96733
1699.5	0.92505	0.94425	0.90764		1699.5	0.92692	0.95194	0.90948		1699.5	0.28937	0.58099	0.3016		1699.5	0.538546	0.235831	0.520569														1850.75	0.96722
1699.25	0.92544	0.94336	0.9067		1699.25	0.92665	0.94909	0.90789		1699.25	0.28798	0.58128	0.29504		1699.25	0.540638	0.235615	0.530119														1850.5	0.96787
1699	0.92561	0.94229	0.9064		1699	0.92637	0.94634	0.90714		1699	0.28654	0.57995	0.29197		1699	0.542815	0.236609	0.534662														1850.25	0.96813
1698.75	0.92608	0.94111	0.90798		1698.75	0.92655	0.9439	0.90844		1698.75	0.28746	0.58108	0.2973		1698.75	0.541423	0.235764	0.526805														1850	0.96678
1698.5	0.9269	0.93997	0.90931		1698.5	0.9271	0.94187	0.9095		1698.5	0.29029	0.58503	0.30173		1698.5	0.537168	0.232822	0.520382														1849.75	0.96555
1698.25	0.92757	0.93898	0.90895		1698.25	0.92752	0.94021	0.9089		1698.25	0.29242	0.58998	0.2992		1698.25	0.533993	0.229163	0.524038														1849.5	0.96641
1698	0.92698	0.93812	0.90787		1698	0.9269	0.93888	0.9078		1698	0.28927	0.59402	0.29467		1698	0.538697	0.226199	0.530664														1849.25	0.96753
1697.75	0.92508	0.93734	0.90693		1697.75	0.92539	0.93781	0.90724		1697.75	0.28165	0.59568	0.29236		1697.75	0.55029	0.224987	0.534082														1849	0.9667
1697.5	0.92301	0.93659	0.9056		1697.5	0.92411	0.9368	0.90668		1697.5	0.27536	0.59345	0.29012		1697.5	0.560099	0.226616	0.537422														1848.75	0.96514
1697.25	0.92135	0.93598	0.90369		1697.25	0.92359	0.93593	0.90589		1697.25	0.27284	0.58751	0.28694		1697.25	0.564092	0.230985	0.542209														1848.5	0.96459
1697	0.92015	0.93572	0.9023		1697	0.92371	0.93565	0.90579		1697	0.2734	0.58163	0.28651		1697	0.563201	0.235353	0.54286														1848.25	0.96401
1696.75	0.91962	0.93586	0.90227		1696.75	0.92436	0.93617	0.90691		1696.75	0.27656	0.57819	0.29103		1696.75	0.558211	0.237929	0.536062														1848	0.96228
1696.5	0.91958	0.93611	0.90248		1696.5	0.92512	0.93722	0.90792		1696.5	0.28032	0.57482	0.29515		1696.5	0.552346	0.240468	0.529957														1847.75	0.96077
1696.25	0.9189	0.93622	0.90165		1696.25	0.92478	0.9385	0.90742		1696.25	0.27865	0.57033	0.29312		1696.25	0.554941	0.243874	0.532955														1847.5	0.96095
1696	0.91674	0.93611	0.89958		1696	0.92266	0.93973	0.90539		1696	0.26836	0.56556	0.28494		1696	0.571282	0.247521	0.545247														1847.25	0.96109
1695.75	0.9136	0.93582	0.89675		1695.75	0.91967	0.94064	0.90271		1695.75	0.25449	0.56177	0.27444		1695.75	0.594329	0.250441	0.561553														1847	0.96035
1695.5	0.91045	0.93559	0.89371		1695.5	0.91718	0.94123	0.90031		1695.5	0.24346	0.56035	0.2654		1695.5	0.613572	0.251541	0.576099														1846.75	0.96093
1695.25	0.90791	0.93557	0.89156		1695.25	0.91591	0.94157	0.89941		1695.25	0.23801	0.56106	0.26205		1695.25	0.623405	0.250991	0.581616														1846.5	0.96288
1695	0.9069	0.93571	0.89208		1695	0.9164	0.94176	0.90143		1695	0.24012	0.56212	0.26957		1695	0.619572	0.250171	0.569328														1846.25	0.9635
1694.75	0.9076	0.93592	0.89392		1694.75	0.91807	0.94213	0.90424		1694.75	0.24736	0.56194	0.28038		1694.75	0.606671	0.25031	0.552253														1846	0.96189
1694.5	0.90874	0.93607	0.89396		1694.5	0.91913	0.94299	0.90419		1694.5	0.25208	0.56006	0.28018		1694.5	0.598462	0.251765	0.552563														1845.75	0.95973
1694.25	0.90978	0.93612	0.89333		1694.25	0.91914	0.94437	0.90251		1694.25	0.2521	0.55683	0.27369		1694.25	0.598427	0.254277	0.562741														1845.5	0.95788
1694	0.9108	0.93599	0.89367		1694	0.91868	0.94579	0.9014		1694	0.25007	0.55332	0.26948		1694	0.601938	0.257024	0.569473														1845.25	0.95633
1693.75	0.91179	0.93542	0.89438		1693.75	0.91848	0.94621	0.90094		1693.75	0.24918	0.54904	0.26772		1693.75	0.603487	0.260396	0.572319														1845	0.95497
1693.5	0.91236	0.93439	0.89434		1693.5	0.91858	0.94508	0.90044		1693.5	0.24962	0.54123	0.26586		1693.5	0.602721	0.266618	0.575347														1844.75	0.95342
1693.25	0.91097	0.93309	0.89256		1693.25	0.91752	0.94268	0.89899		1693.25	0.24497	0.52861	0.26049		1693.25	0.610887	0.276865	0.584209														1844.5	0.95223
1693	0.9069	0.93182	0.88888		1693	0.91442	0.93988	0.89626		1693	0.23179	0.5116	0.25068		1693	0.634905	0.291069	0.60088														1844.25	0.95341
1692.75	0.90194	0.93096	0.88509		1692.75	0.91111	0.93779	0.89408		1692.75	0.21842	0.49403	0.24311		1692.75	0.660708	0.306247	0.614197														1844	0.95607
1692.5	0.89831	0.93072	0.88307		1692.5	0.90971	0.93707	0.89427		1692.5	0.21302	0.49058	0.24376		1692.5	0.67158	0.30929	0.613038														1843.75	0.9544
1692.25	0.89674	0.93081	0.88264		1692.25	0.91039	0.9375	0.89607		1692.25	0.21564	0.51327	0.25004		1692.25	0.666271	0.289654	0.601991														1843.5	0.95111
1692	0.8976	0.93084	0.88295		1692	0.91293	0.93857	0.89803		1692	0.22566	0.54238	0.25701		1692	0.646545	0.265696	0.59005														1843.25	0.95216
1691.75	0.90061	0.9308	0.88358		1691.75	0.91703	0.94026	0.8997		1691.75	0.24285	0.55622	0.26311		1691.75	0.614662	0.254753	0.579863														1843	0.95508
1691.5	0.90351	0.93077	0.88418		1691.5	0.92081	0.94258	0.90112		1691.5	0.25971	0.55658	0.2684		1691.5	0.585511	0.254472	0.571217														1842.75	0.95675
1691.25	0.90476	0.93081	0.8876		1691.25	0.92343	0.94498	0.90591		1691.25	0.27203	0.55173	0.28699		1691.25	0.565383	0.258273	0.542133														1842.5	0.9568
1691	0.90347	0.93095	0.89388		1691	0.92496	0.94685	0.91514		1691	0.27952	0.54547	0.32623		1691	0.553587	0.263229	0.486476														1842.25	0.95586
1690.75	0.895	0.931	0.88328		1690.75	0.92082	0.94798	0.90877		1690.75	0.25977	0.54012	0.29868		1690.75	0.585411	0.26751	0.524794														1842	0.95594
1690.5	0.88361	0.93065	0.85537		1690.5	0.91442	0.94848	0.88519		1690.5	0.23176	0.53652	0.21428		1690.5	0.634962	0.270414	0.669018														1841.75	0.95841
1690.25	0.88094	0.92997	0.84901		1690.25	0.9155	0.94915	0.88232		1690.25	0.23629	0.53518	0.20566		1690.25	0.626555	0.2715	0.68685														1841.5	0.96101
1690	0.8908	0.92959	0.88463		1690	0.92429	0.9517	0.91789		1690	0.27621	0.53707	0.33882		1690	0.558761	0.269969	0.470031														1841.25	0.96203
1689.75	0.89151	0.9309	0.88692		1689.75	0.91883	0.96123	0.91411		1689.75	0.25074	0.54344	0.32159		1689.75	0.600776	0.264848	0.492697														1841	0.96241
1689.5	0.889	0.93396	0.87544		1689.5	0.91038	0.96652	0.89648		1689.5	0.21558	0.5499	0.25147		1689.5	0.666392	0.259716	0.599514														1840.75	0.96307
1689.25	0.89034	0.93509	0.87491		1689.25	0.90736	0.97178	0.89164		1689.25	0.20419	0.54627	0.23484		1689.25	0.689966	0.262593	0.629228														1840.5	0.96368
1689	0.89356	0.93198	0.87909		1689	0.90722	0.96701	0.89253		1689	0.2037	0.52683	0.23784		1689	0.691009	0.27833	0.623715														1840.25	0.96408
1688.75	0.89678	0.92827	0.88323		1688.75	0.90774	0.95672	0.89402		1688.75	0.20561	0.49587	0.24289		1688.75	0.686956	0.304632	0.61459														1840	0.96468
1688.5	0.89874	0.92631	0.88446		1688.5	0.90775	0.94858	0.89333		1688.5	0.20565	0.46753	0.24054		1688.5	0.686871	0.330191	0.618813														1839.75	0.96541
1688.25	0.89887	0.9255	0.88194		1688.25	0.90695	0.94319	0.88987		1688.25	0.2027	0.46228	0.22903		1688.25	0.693146	0.335095	0.640108														1839.5	0.96545
1688	0.89745	0.92499	0.87847		1688	0.90543	0.93913	0.88628		1688	0.19721	0.47564	0.21762		1688	0.705071	0.322722	0.662301														1839.25	0.96498
1687.75	0.89499	0.92438	0.87692		1687.75	0.90343	0.93568	0.8852		1687.75	0.19024	0.48163	0.21429		1687.75	0.720698	0.317286	0.668998														1839	0.96536
1687.5	0.892	0.92381	0.8765		1687.5	0.9014	0.93308	0.88573		1687.5	0.18334	0.47567	0.21593		1687.5	0.736743	0.322694	0.665687														1838.75	0.96646
1687.25	0.88963	0.92345	0.87507		1687.25	0.9003	0.93175	0.88557		1687.25	0.17974	0.4644	0.21543		1687.25	0.745355	0.333108	0.666694														1838.5	0.96667
1687	0.88915	0.92318	0.87307		1687	0.90105	0.93138	0.88476		1687	0.18219	0.45411	0.21295		1687	0.739475	0.342839	0.671722														1838.25	0.96582
1686.75	0.89107	0.92282	0.8727		1686.75	0.90348	0.93153	0.88486		1686.75	0.1904	0.44715	0.21325		1686.75	0.720333	0.349547	0.671111														1838	0.96523
1686.5	0.89439	0.92249	0.87488		1686.5	0.90598	0.93221	0.88621		1686.5	0.19918	0.44162	0.2174		1686.5	0.700754	0.354951	0.66274														1837.75	0.96467
1686.25	0.89728	0.92241	0.87833		1686.25	0.90684	0.93348	0.88769		1686.25	0.20229	0.43568	0.22203		1686.25	0.694026	0.360832	0.653588														1837.5	0.96296
1686	0.89965	0.92258	0.88142		1686	0.90697	0.93493	0.88858		1686	0.20276	0.42872	0.22487		1686	0.693018	0.367826	0.648068														1837.25	0.96127
1685.75	0.90195	0.92267	0.88345		1685.75	0.90736	0.93552	0.88874		1685.75	0.20419	0.42113	0.22538		1685.75	0.689966	0.375584	0.647085														1837	0.96222
1685.5	0.90385	0.92196	0.88407		1685.5	0.90755	0.9339	0.8877		1685.5	0.20491	0.41391	0.22205		1685.5	0.688437	0.383094	0.653549														1836.75	0.96428
1685.25	0.90494	0.92022	0.88356		1685.25	0.90701	0.93003	0.88558		1685.25	0.20293	0.40772	0.21547		1685.25	0.692654	0.389638	0.666613														1836.5	0.96384
1685	0.90483	0.9183	0.88307		1685	0.90556	0.92577	0.88377		1685	0.19768	0.40245	0.20998		1685	0.704037	0.395288	0.677822														1836.25	0.96221
1684.75	0.90394	0.91677	0.88322		1684.75	0.90379	0.92226	0.88307		1684.75	0.19146	0.39769	0.20787		1684.75	0.717922	0.400455	0.682208														1836	0.96183
1684.5	0.90377	0.9156	0.88355		1684.5	0.90323	0.91935	0.88303		1684.5	0.18955	0.39322	0.20776		1684.5	0.722276	0.405364	0.682438														1835.75	0.96294
1684.25	0.90479	0.91464	0.88349		1684.25	0.90427	0.91673	0.88298		1684.25	0.19313	0.3896	0.20761		1684.25	0.71415	0.409381	0.682752														1835.5	0.96472
1684	0.90581	0.91374	0.88291		1684	0.90548	0.91447	0.88259		1684	0.1974	0.38805	0.20644		1684	0.704653	0.411112	0.685206														1835.25	0.96586
1683.75	0.9053	0.91284	0.88176		1683.75	0.90531	0.91269	0.88177		1683.75	0.19679	0.38886	0.20403		1683.75	0.705997	0.410207	0.690306														1835	0.96555
1683.5	0.90238	0.91199	0.88007		1683.5	0.90312	0.91146	0.8808		1683.5	0.18915	0.39032	0.20121		1683.5	0.723194	0.408579	0.69635														1834.75	0.96452
1683.25	0.89803	0.91122	0.87825		1683.25	0.89997	0.91069	0.88014		1683.25	0.17865	0.39101	0.19933		1683.25	0.747997	0.407812	0.700427														1834.5	0.96385
1683	0.8946	0.91046	0.87684		1683	0.8981	0.91013	0.88027		1683	0.1727	0.39036	0.19971		1683	0.762708	0.408535	0.6996														1834.25	0.96391
1682.75	0.8934	0.90983	0.87616		1682.75	0.89846	0.90984	0.88112		1682.75	0.17383	0.38863	0.20215		1682.75	0.759875	0.410464	0.694326														1834	0.96443
1682.5	0.89435	0.90955	0.87617		1682.5	0.90035	0.9103	0.88205		1682.5	0.17991	0.38728	0.20486		1682.5	0.744945	0.411975	0.688543														1833.75	0.96459
1682.25	0.89786	0.90969	0.87783		1682.25	0.90404	0.91165	0.88388		1682.25	0.19234	0.38718	0.21029		1682.25	0.71593	0.412087	0.677181														1833.5	0.96405
1682	0.9037	0.91014	0.88297		1682	0.91009	0.9137	0.88488		1682	0.21448	0.38801	0.21333		1682	0.668613	0.411157	0.670948														1833.25	0.96356
1681.75	0.90572	0.91068	0.88649		1681.75	0.91251	0.91584	0.88571		1681.75	0.224	0.38919	0.21585		1681.75	0.649752	0.409838	0.665848														1833	0.96373
1681.5	0.90016	0.9109	0.88085		1681.5	0.90677	0.91701	0.88732		1681.5	0.20204	0.39011	0.22086		1681.5	0.694563	0.408813	0.655883														1832.75	0.96436
1681.25	0.89422	0.91043	0.87358		1681.25	0.89989	0.91671	0.87911		1681.25	0.17839	0.39044	0.19641		1681.25	0.748629	0.408446	0.706836														1832.5	0.96491
1681	0.89153	0.90932	0.87002		1681	0.89589	0.91575	0.87427		1681	0.16588	0.38962	0.18318		1681	0.780206	0.409359	0.737122														1832.25	0.96494
1680.75	0.89153	0.90808	0.86921		1680.75	0.89495	0.91489	0.87254		1680.75	0.16304	0.38626	0.17864		1680.75	0.787706	0.41312	0.748021														1832	0.96452
1680.5	0.89292	0.90747	0.86965		1680.5	0.89607	0.91414	0.87272		1680.5	0.16642	0.38025	0.17911		1680.5	0.778794	0.419931	0.74688														1831.75	0.96414
1680.25	0.8938	0.90748	0.87033		1680.25	0.89697	0.91323	0.87342		1680.25	0.16918	0.37278	0.18094		1680.25	0.771651	0.428547	0.742465														1831.5	0.9639
1680	0.893	0.90758	0.87052		1680	0.89617	0.91202	0.87361		1680	0.16673	0.3656	0.18143		1680	0.777986	0.436994	0.741291														1831.25	0.96355
1679.75	0.89175	0.90722	0.87059		1679.75	0.89508	0.91069	0.87385		1679.75	0.16343	0.36086	0.18206		1679.75	0.786668	0.442661	0.739785														1831	0.96248
1679.5	0.89116	0.90626	0.8708		1679.5	0.89499	0.90946	0.87455		1679.5	0.16316	0.35953	0.1839		1679.5	0.787386	0.444265	0.735418														1830.75	0.96024
1679.25	0.89015	0.90501	0.86978		1679.25	0.89463	0.90822	0.87416		1679.25	0.16212	0.35999	0.18289		1679.25	0.790163	0.44371	0.73781														1830.5	0.95828
1679	0.888	0.90383	0.86695		1679	0.89313	0.90705	0.87195		1679	0.15771	0.3602	0.17713		1679	0.802141	0.443456	0.751708														1830.25	0.95868
1678.75	0.88618	0.9031	0.8645		1678.75	0.89175	0.90647	0.86994		1678.75	0.15378	0.35998	0.17202		1678.75	0.8131	0.443722	0.764421														1830	0.96028
1678.5	0.88599	0.90296	0.86419		1678.5	0.89177	0.90684	0.86983		1678.5	0.15383	0.3598	0.17175		1678.5	0.812959	0.443939	0.765103														1829.75	0.95819
1678.25	0.88747	0.90321	0.86571		1678.25	0.89367	0.90776	0.87176		1678.25	0.15927	0.35999	0.17663		1678.25	0.797866	0.44371	0.752936														1829.5	0.95341
1678	0.88899	0.90353	0.86672		1678	0.89613	0.90875	0.87367		1678	0.16659	0.3608	0.1816		1678	0.778351	0.442733	0.740884														1829.25	0.94967
1677.75	0.88982	0.9037	0.86666		1677.75	0.89798	0.90938	0.8746		1677.75	0.17231	0.36106	0.18405		1677.75	0.76369	0.442421	0.735064														1829	0.94919
1677.5	0.88912	0.90354	0.86568		1677.5	0.89802	0.90943	0.87435		1677.5	0.17244	0.35915	0.18337		1677.5	0.763362	0.444724	0.736672														1828.75	0.95328
1677.25	0.88501	0.90293	0.86322		1677.25	0.89435	0.90924	0.87233		1677.25	0.16127	0.3554	0.1781		1677.25	0.792446	0.449283	0.749336														1828.5	0.95666
1677	0.87902	0.90207	0.85993		1677	0.8888	0.90931	0.8695		1677	0.14567	0.35336	0.17093		1677	0.83663	0.451783	0.767182														1828.25	0.95698
1676.75	0.87528	0.90148	0.85712		1676.75	0.88583	0.90975	0.86745		1676.75	0.13791	0.36049	0.16592		1676.75	0.860404	0.443107	0.780101														1828	0.95802
1676.5	0.8758	0.90137	0.85588		1676.5	0.88768	0.91038	0.86748		1676.5	0.1427	0.35966	0.166		1676.5	0.845576	0.444108	0.779892														1827.75	0.96125
1676.25	0.87943	0.90158	0.85829		1676.25	0.8931	0.91109	0.87162		1676.25	0.15763	0.36156	0.17629		1676.25	0.802361	0.44182	0.753772														1827.5	0.96339
1676	0.88184	0.90179	0.86262		1676	0.89748	0.91182	0.87792		1676	0.17074	0.3665	0.19307		1676	0.767665	0.435926	0.714285														1827.25	0.96277
1675.75	0.87906	0.90167	0.86014		1675.75	0.89652	0.91254	0.87721		1675.75	0.16777	0.34628	0.19112		1675.75	0.775286	0.460573	0.718694														1827	0.9619
1675.5	0.87335	0.90098	0.85229		1675.5	0.89158	0.9132	0.87008		1675.5	0.15331	0.33599	0.17239		1675.5	0.81443	0.473674	0.763488														1826.75	0.96238
1675.25	0.86942	0.89972	0.84768		1675.25	0.88677	0.9137	0.8646		1675.25	0.14033	0.33182	0.15916		1675.25	0.852849	0.479097	0.798166														1826.5	0.963
1675	0.87029	0.89864	0.84857		1675	0.88521	0.91458	0.86311		1675	0.13636	0.32924	0.15574		1675	0.865313	0.482487	0.8076														1826.25	0.96258
1674.75	0.87503	0.89901	0.85209		1674.75	0.88673	0.91686	0.86348		1674.75	0.14022	0.32618	0.15657		1674.75	0.85319	0.486543	0.805291														1826	0.96087
1674.5	0.87942	0.90047	0.85513		1674.5	0.88778	0.91927	0.86326		1674.5	0.14296	0.3233	0.15607		1674.5	0.844785	0.490394	0.806681														1825.75	0.95839
1674.25	0.88268	0.90102	0.85758		1674.25	0.88793	0.91901	0.86268		1674.25	0.14335	0.32151	0.15476		1674.25	0.843602	0.492806	0.810341														1825.5	0.95583
1674	0.88541	0.89974	0.85984		1674	0.88808	0.91516	0.86243		1674	0.14375	0.32018	0.15418		1674	0.842392	0.494606	0.811972														1825.25	0.95436
1673.75	0.88779	0.89738	0.8619		1673.75	0.88854	0.90937	0.86263		1673.75	0.14498	0.31842	0.15464		1673.75	0.838692	0.497	0.810678														1825	0.95689
1673.5	0.8895	0.89514	0.86326		1673.5	0.88895	0.90365	0.86273		1673.5	0.14608	0.31679	0.15486		1673.5	0.835409	0.499229	0.810061														1824.75	0.96179
1673.25	0.89042	0.89347	0.86369		1673.25	0.88901	0.89878	0.86232		1673.25	0.14624	0.31639	0.15395		1673.25	0.834934	0.499777	0.81262														1824.5	0.96192
1673	0.89084	0.89212	0.86359		1673	0.88879	0.89481	0.8616		1673	0.14565	0.31723	0.15232		1673	0.83669	0.498626	0.817243														1824.25	0.95939
1672.75	0.8911	0.8908	0.8635		1672.75	0.88844	0.89156	0.86092		1672.75	0.14472	0.31766	0.15081		1672.75	0.839471	0.498037	0.82157														1824	0.95953
1672.5	0.89119	0.88957	0.86375		1672.5	0.88814	0.88902	0.8608		1672.5	0.14392	0.31417	0.15055		1672.5	0.841879	0.502835	0.822319														1823.75	0.96157
1672.25	0.8911	0.88853	0.86434		1672.25	0.888	0.88712	0.86133		1672.25	0.14354	0.30587	0.15172		1672.25	0.843027	0.514463	0.818957														1823.5	0.96266
1672	0.89063	0.88765	0.86457		1672	0.88755	0.88561	0.86158		1672	0.14238	0.2969	0.15228		1672	0.846551	0.52739	0.817357														1823.25	0.96247
1671.75	0.88988	0.88691	0.86395		1671.75	0.88673	0.88426	0.86089		1671.75	0.14023	0.28989	0.15075		1671.75	0.853159	0.537767	0.821743														1823	0.96185
1671.5	0.88958	0.88622	0.86279		1671.5	0.88635	0.88319	0.85966		1671.5	0.13925	0.28468	0.14804		1671.5	0.856205	0.545643	0.829621														1822.75	0.96144
1671.25	0.88967	0.88554	0.86143		1671.25	0.88655	0.88246	0.85841		1671.25	0.13977	0.28044	0.14535		1671.25	0.854586	0.55216	0.837585														1822.5	0.96176
1671	0.88853	0.88488	0.85975		1671	0.886	0.88182	0.8573		1671	0.13835	0.27654	0.14299		1671	0.859021	0.558242	0.844694														1822.25	0.9623
1670.75	0.88565	0.88428	0.85796		1670.75	0.88422	0.88115	0.85657		1670.75	0.13387	0.27271	0.14146		1670.75	0.873317	0.564299	0.849366														1822	0.96241
1670.5	0.88245	0.88387	0.85661		1670.5	0.88242	0.88066	0.85657		1670.5	0.12949	0.26912	0.14147		1670.5	0.887764	0.570054	0.849336														1821.75	0.96273
1670.25	0.88022	0.88369	0.85594		1670.25	0.88166	0.88059	0.85734		1670.25	0.12768	0.26588	0.14307		1670.25	0.893877	0.575314	0.844451														1821.5	0.96383
1670	0.87925	0.88366	0.85553		1670	0.88221	0.88114	0.85841		1670	0.12901	0.26275	0.14536		1670	0.889377	0.580457	0.837555														1821.25	0.96458
1669.75	0.87996	0.88372	0.85545		1669.75	0.88449	0.88229	0.85986		1669.75	0.13456	0.26018	0.14849		1669.75	0.871084	0.584726	0.828303														1821	0.96423
1669.5	0.88258	0.8838	0.85725		1669.5	0.88852	0.88377	0.86302		1669.5	0.14493	0.25903	0.15553		1669.5	0.838842	0.58665	0.808186														1820.75	0.96393
1669.25	0.88394	0.88383	0.85763		1669.25	0.89063	0.88528	0.86412		1669.25	0.15066	0.25958	0.15806		1669.25	0.822002	0.585729	0.801178														1820.5	0.96457
1669	0.88162	0.8836	0.85173		1669	0.8882	0.88658	0.85809		1669	0.14408	0.26141	0.14466		1669	0.841396	0.582678	0.839652														1820.25	0.96548
1668.75	0.87784	0.88294	0.84576		1668.75	0.88389	0.8875	0.85159		1668.75	0.13307	0.26364	0.13141		1668.75	0.87592	0.578989	0.881372														1820	0.966
1668.5	0.87435	0.88197	0.84497		1668.5	0.87984	0.88791	0.85028		1668.5	0.12345	0.26457	0.12889		1668.5	0.908509	0.577459	0.889781														1819.75	0.9661
1668.25	0.8727	0.88117	0.84786		1668.25	0.87745	0.88784	0.85247		1668.25	0.11807	0.26263	0.13314		1668.25	0.92786	0.580656	0.875691														1819.5	0.966
1668	0.87449	0.88088	0.8502		1668	0.87803	0.88746	0.85365		1668	0.11937	0.25809	0.1355		1668	0.923105	0.588229	0.868061														1819.25	0.96607
1667.75	0.8776	0.88101	0.85029		1667.75	0.87965	0.88708	0.85227		1667.75	0.12301	0.25312	0.13276		1667.75	0.91006	0.596674	0.876933														1819	0.96625
1667.5	0.8794	0.88126	0.84897		1667.5	0.87997	0.8868	0.84952		1667.5	0.12374	0.25072	0.12743		1667.5	0.90749	0.600811	0.894728														1818.75	0.96593
1667.25	0.87988	0.8813	0.84814		1667.25	0.87922	0.8861	0.84751		1667.25	0.12203	0.25076	0.12368		1667.25	0.913533	0.600742	0.907701														1818.5	0.96521
1667	0.87988	0.88087	0.84913		1667	0.87833	0.88444	0.84762		1667	0.12002	0.25116	0.12389		1667	0.920746	0.60005	0.906964														1818.25	0.96497
1666.75	0.88007	0.8801	0.85019		1666.75	0.87795	0.88215	0.84814		1666.75	0.11918	0.24972	0.12485		1666.75	0.923797	0.602547	0.903611														1818	0.96509
1666.5	0.88073	0.87924	0.84954		1666.5	0.87833	0.87981	0.84722		1666.5	0.12002	0.246	0.12314		1666.5	0.920746	0.609065	0.909601														1817.75	0.96462
1666.25	0.88121	0.87833	0.84871		1666.25	0.8787	0.87767	0.84629		1666.25	0.12086	0.24118	0.12146		1666.25	0.917717	0.617659	0.915567														1817.5	0.9637
1666	0.88098	0.8773	0.84934		1666	0.87841	0.87575	0.84687		1666	0.12022	0.23677	0.12252		1666	0.920023	0.625673	0.911793														1817.25	0.96337
1665.75	0.881	0.87624	0.85048		1665.75	0.87835	0.87412	0.84792		1665.75	0.12008	0.23404	0.12445		1665.75	0.920529	0.63071	0.905005														1817	0.96408
1665.5	0.8819	0.87523	0.8509		1665.5	0.8791	0.87284	0.8482		1665.5	0.12176	0.23352	0.12495		1665.5	0.914495	0.631676	0.903264														1816.75	0.9653
1665.25	0.88232	0.87422	0.85073		1665.25	0.87932	0.87173	0.84783		1665.25	0.12226	0.23445	0.12428		1665.25	0.912716	0.62995	0.905599														1816.5	0.96591
1665	0.88139	0.87322	0.85037		1665	0.87822	0.87068	0.84731		1665	0.11979	0.23565	0.12332		1665	0.921579	0.627733	0.908966														1816.25	0.96523
1664.75	0.88044	0.8724	0.85013		1664.75	0.87722	0.86978	0.84702		1664.75	0.11758	0.23626	0.12278		1664.75	0.929667	0.62661	0.910872														1816	0.96434
1664.5	0.88029	0.87187	0.84996		1664.5	0.87721	0.8691	0.84699		1664.5	0.11755	0.23566	0.12272		1664.5	0.929777	0.627714	0.911085														1815.75	0.96458
1664.25	0.87998	0.87143	0.84927		1664.25	0.87729	0.86847	0.84667		1664.25	0.11772	0.23342	0.12214		1664.25	0.92915	0.631862	0.913142														1815.5	0.9654
1664	0.8787	0.87097	0.84774		1664	0.87661	0.86784	0.84572		1664	0.11624	0.23028	0.12042		1664	0.934644	0.637744	0.919301														1815.25	0.96571
1663.75	0.87678	0.87071	0.84596		1663.75	0.87529	0.86752	0.84452		1663.75	0.11342	0.22813	0.11829		1663.75	0.94531	0.641818	0.927052														1815	0.96576
1663.5	0.87505	0.87078	0.84449		1663.5	0.87409	0.86774	0.84356		1663.5	0.1109	0.22772	0.11659		1663.5	0.955068	0.642599	0.933339														1814.75	0.96594
1663.25	0.87427	0.87109	0.84325		1663.25	0.87392	0.86842	0.84291		1663.25	0.11055	0.22848	0.11546		1663.25	0.956441	0.641152	0.937568														1814.5	0.96578
1663	0.87407	0.87145	0.84196		1663	0.87456	0.86938	0.84243		1663	0.11189	0.22927	0.11464		1663	0.951209	0.639653	0.940664														1814.25	0.96512
1662.75	0.87322	0.87169	0.84053		1662.75	0.8748	0.87021	0.84206		1662.75	0.11239	0.22883	0.114		1662.75	0.949272	0.640487	0.943095														1814	0.96474
1662.5	0.87083	0.87171	0.83874		1662.5	0.8737	0.87076	0.84151		1662.5	0.11011	0.22633	0.11307		1662.5	0.958173	0.645258	0.946653														1813.75	0.96515
1662.25	0.86679	0.87157	0.83625		1662.25	0.87109	0.87122	0.8404		1662.25	0.10483	0.22188	0.11119		1662.25	0.979514	0.653882	0.953934														1813.5	0.96589
1662	0.86245	0.87147	0.83377		1662	0.86819	0.87195	0.83932		1662	0.099292	0.21812	0.1094		1662	1.00309	0.661305	0.960983														1813.25	0.96632
1661.75	0.86033	0.87169	0.83289		1661.75	0.86746	0.87327	0.83979		1661.75	0.097924	0.21939	0.11018		1661.75	1.00911	0.658783	0.957897														1813	0.9662
1661.5	0.86083	0.87207	0.83339		1661.5	0.86955	0.87495	0.84184		1661.5	0.10185	0.2245	0.11362		1661.5	0.992039	0.648784	0.944545														1812.75	0.9654
1661.25	0.86088	0.87212	0.83212		1661.25	0.8719	0.87644	0.84277		1661.25	0.10646	0.2265	0.11523		1661.25	0.972814	0.644932	0.938434														1812.5	0.96364
1661	0.85801	0.87166	0.82794		1661	0.87181	0.87746	0.84125		1661	0.10626	0.22193	0.11263		1661	0.97363	0.653784	0.948346														1812.25	0.96148
1660.75	0.85321	0.87095	0.82411		1660.75	0.86912	0.87817	0.83949		1660.75	0.10104	0.2138	0.10968		1660.75	0.995507	0.669992	0.959873														1812	0.9608
1660.5	0.84983	0.87022	0.82319		1660.5	0.86676	0.87904	0.83959		1660.5	0.096642	0.20631	0.10985		1660.5	1.01483	0.68548	0.9592														1811.75	0.96174
1660.25	0.85368	0.86959	0.82687		1660.25	0.87152	0.88072	0.84414		1660.25	0.10569	0.2009	0.11762		1660.25	0.975966	0.69702	0.929519														1811.5	0.9618
1660	0.86763	0.86932	0.83288		1660	0.86831	0.8833	0.85221		1660	0.099508	0.19662	0.13263		1660	1.00214	0.706372	0.877358														1811.25	0.96033
1659.75	0.88099	0.86957	0.83039		1659.75	0.86935	0.88579	0.8552		1659.75	0.10147	0.19252	0.13863		1659.75	0.993662	0.715524	0.858143														1811	0.95841
1659.5	0.89588	0.87087	0.83333		1659.5	0.86968	0.88822	0.86989		1659.5	0.1021	0.18875	0.17191		1659.5	0.990974	0.724113	0.764699														1810.75	0.9567
1659.25	0.97739	0.87424	0.91761		1659.25	0.86818	0.8925	0.86448		1659.25	0.099269	0.18562	0.15889		1659.25	1.00319	0.731375	0.798903														1810.5	0.95603
1659	1.0017	0.87872	1.012		1659	0.87085	0.89912	0.87266		1659	0.10438	0.18304	0.17894		1659	0.981383	0.737454	0.747293														1810.25	0.95709
1658.75	0.86351	0.88126	0.84543		1658.75	0.87004	0.90759	0.87624		1658.75	0.1028	0.18086	0.18846		1658.75	0.988007	0.742657	0.724781														1810	0.95892
1658.5	0.84775	0.88047	0.82228		1658.5	0.86971	0.9191	0.84359		1658.5	0.10217	0.17887	0.11665		1658.5	0.990677	0.747462	0.933115														1809.75	0.96042
1658.25	0.84767	0.87799	0.82099		1658.25	0.8642	0.9307	0.837		1658.25	0.092081	0.17694	0.10564		1658.25	1.03583	0.752174	0.976172														1809.5	0.96156
1658	0.85057	0.87496	0.82141		1658	0.86305	0.92113	0.83346		1658	0.090109	0.17505	0.10014		1658	1.04523	0.756838	0.999392														1809.25	0.96273
1657.75	0.85385	0.87252	0.82151		1657.75	0.86302	0.90431	0.83033		1657.75	0.090045	0.17338	0.095492		1657.75	1.04554	0.761001	1.02003														1809	0.96402
1657.5	0.85622	0.87035	0.823		1657.5	0.86297	0.89291	0.8295		1657.5	0.089968	0.17223	0.094286		1657.5	1.04591	0.763891	1.02555														1808.75	0.96429
1657.25	0.85746	0.86831	0.8256		1657.25	0.8627	0.88525	0.83065		1657.25	0.089506	0.17172	0.095952		1657.25	1.04815	0.765179	1.01795														1808.5	0.96292
1657	0.85827	0.86652	0.82752		1657	0.86257	0.87924	0.83167		1657	0.08929	0.17165	0.097448		1657	1.0492	0.765356	1.01123														1808.25	0.96123
1656.75	0.8591	0.86506	0.82807		1656.75	0.86292	0.87435	0.83175		1656.75	0.089883	0.17181	0.097574		1656.75	1.04632	0.764952	1.01067														1808	0.96056
1656.5	0.8601	0.86395	0.82792		1656.5	0.86387	0.87076	0.83155		1656.5	0.09151	0.17205	0.097274		1656.5	1.03853	0.764345	1.012														1807.75	0.96055
1656.25	0.86052	0.86315	0.82731		1656.25	0.86454	0.86843	0.83117		1656.25	0.092674	0.17213	0.096724		1656.25	1.03304	0.764143	1.01447														1807.5	0.96066
1656	0.85911	0.86251	0.82599		1656	0.86339	0.86684	0.83011		1656	0.090682	0.17149	0.095165		1656	1.04248	0.765761	1.02152														1807.25	0.96127
1655.75	0.85667	0.86192	0.82445		1655.75	0.86123	0.86575	0.82884		1655.75	0.08705	0.16968	0.093343		1655.75	1.06023	0.770369	1.02992														1807	0.96255
1655.5	0.85544	0.86139	0.82359		1655.5	0.86053	0.86517	0.82849		1655.5	0.085904	0.16703	0.092856		1655.5	1.06599	0.777206	1.03219														1806.75	0.96414
1655.25	0.85537	0.86099	0.82333		1655.25	0.86148	0.86501	0.82922		1655.25	0.087466	0.16488	0.093884		1655.25	1.05816	0.782832	1.02741														1806.5	0.96563
1655	0.85328	0.86083	0.82242		1655	0.86109	0.86512	0.82994		1655	0.086812	0.16412	0.094928		1655	1.06142	0.784838	1.02261														1806.25	0.9662
1654.75	0.85008	0.86084	0.82097		1654.75	0.86025	0.86542	0.83079		1654.75	0.085444	0.16445	0.096158		1654.75	1.06832	0.783966	1.01701														1806	0.96552
1654.5	0.85003	0.86079	0.81999		1654.5	0.86318	0.86591	0.83268		1654.5	0.090321	0.16513	0.098955		1654.5	1.04421	0.782174	1.00456														1805.75	0.96446
1654.25	0.85147	0.86071	0.81843		1654.25	0.86814	0.86686	0.83445		1654.25	0.09919	0.16524	0.10164		1654.25	1.00353	0.781885	0.992935														1805.5	0.96362
1654	0.84756	0.86093	0.81511		1654	0.86779	0.8688	0.83457		1654	0.098547	0.16409	0.10183		1654	1.00636	0.784918	0.992124														1805.25	0.9631
1653.75	0.84107	0.86171	0.81097		1653.75	0.86408	0.87202	0.83316		1653.75	0.091876	0.16205	0.099677		1653.75	1.0368	0.790351	1.00141														1805	0.96305
1653.5	0.83571	0.86298	0.80583		1653.5	0.86054	0.87633	0.82978		1653.5	0.08592	0.15982	0.094694		1653.5	1.06591	0.796369	1.02368														1804.75	0.96359
1653.25	0.83245	0.8645	0.80107		1653.25	0.85832	0.88142	0.82596		1653.25	0.082356	0.15748	0.089332		1653.25	1.0843	0.802775	1.04899														1804.5	0.96449
1653	0.83353	0.86577	0.79985		1653	0.85963	0.88644	0.82489		1653	0.084439	0.15487	0.087888		1653	1.07346	0.810033	1.05607														1804.25	0.96526
1652.75	0.83798	0.86677	0.80424		1652.75	0.863	0.89049	0.82826		1652.75	0.09002	0.15222	0.092528		1652.75	1.04566	0.817528	1.03373														1804	0.96566
1652.5	0.83896	0.86787	0.81175		1652.5	0.86065	0.89367	0.83273		1652.5	0.086087	0.14973	0.09903		1652.5	1.06506	0.824691	1.00423														1803.75	0.96578
1652.25	0.84191	0.86875	0.81643		1652.25	0.8589	0.89574	0.83291		1652.25	0.083281	0.14728	0.099308		1652.25	1.07945	0.831856	1.00302														1803.5	0.96564
1652	0.84806	0.86855	0.81886		1652	0.86069	0.89574	0.83106		1652	0.086162	0.14491	0.09655		1652	1.06468	0.838902	1.01525														1803.25	0.96521
1651.75	0.85264	0.86705	0.82074		1651.75	0.86168	0.89294	0.82945		1651.75	0.087792	0.14299	0.094214		1651.75	1.05655	0.844694	1.02588														1803	0.96461
1651.5	0.85548	0.86493	0.82278		1651.5	0.8616	0.88728	0.82867		1651.5	0.087663	0.14175	0.093108		1651.5	1.05718	0.848477	1.03101														1802.75	0.96375
1651.25	0.85721	0.86304	0.82468		1651.25	0.86136	0.88045	0.82868		1651.25	0.08727	0.14073	0.093127		1651.25	1.05914	0.851613	1.03092														1802.5	0.96243
1651	0.85816	0.86161	0.82606		1651	0.86119	0.87445	0.82897		1651	0.086981	0.13969	0.09354		1651	1.06058	0.854835	1.029														1802.25	0.96082
1650.75	0.85904	0.86019	0.82699		1650.75	0.86111	0.86931	0.82897		1650.75	0.086845	0.13908	0.09354		1650.75	1.06126	0.856735	1.029														1802	0.95917
1650.5	0.86034	0.85866	0.8278		1650.5	0.8613	0.8648	0.82872		1650.5	0.087171	0.13926	0.093179		1650.5	1.05963	0.856174	1.03068														1801.75	0.95773
1650.25	0.86216	0.85735	0.82898		1650.25	0.86197	0.86151	0.8288		1650.25	0.088281	0.13995	0.093292		1650.25	1.05413	0.854027	1.03016														1801.5	0.95706
1650	0.86387	0.85636	0.83014		1650	0.8628	0.85938	0.82911		1650	0.089676	0.14078	0.093728		1650	1.04732	0.851459	1.02813														1801.25	0.95738
1649.75	0.86487	0.85538	0.83027		1649.75	0.86357	0.85744	0.82903		1649.75	0.090986	0.14133	0.093612		1649.75	1.04103	0.849766	1.02867														1801	0.9583
1649.5	0.86495	0.8544	0.8295		1649.5	0.864	0.85536	0.82859		1649.5	0.091737	0.14139	0.092987		1649.5	1.03746	0.849581	1.03158														1800.75	0.9588
1649.25	0.86436	0.85368	0.82918		1649.25	0.86379	0.8535	0.82864		1649.25	0.091382	0.14107	0.093067		1649.25	1.03914	0.850565	1.0312														1800.5	0.95805
1649	0.86401	0.8533	0.82996		1649	0.86341	0.85224	0.82939		1649	0.090722	0.14082	0.094136		1649	1.04229	0.851336	1.02624														1800.25	0.95633
1648.75	0.86484	0.85308	0.83107		1648.75	0.86372	0.8518	0.82999		1648.75	0.091255	0.14132	0.094996		1648.75	1.03974	0.849796	1.02229														1800	0.95474
1648.5	0.86631	0.85288	0.83189		1648.5	0.86447	0.85194	0.83012		1648.5	0.092562	0.14222	0.095186		1648.5	1.03357	0.847039	1.02143														1799.75	0.95405
1648.25	0.86703	0.85253	0.83232		1648.25	0.8647	0.85197	0.83009		1648.25	0.092959	0.14232	0.09514		1648.25	1.03171	0.846734	1.02164														1799.5	0.95452
1648	0.86661	0.85203	0.83194		1648	0.86422	0.85144	0.82965		1648	0.092121	0.14126	0.094501		1648	1.03564	0.849981	1.02456														1799.25	0.95593
1647.75	0.8655	0.85156	0.83046		1647.75	0.86343	0.85046	0.82847		1647.75	0.090748	0.13965	0.09283		1647.75	1.04216	0.854959	1.03231														1799	0.95693
1647.5	0.86423	0.85125	0.82932		1647.5	0.86261	0.84945	0.82776		1647.5	0.089356	0.13798	0.09183		1647.5	1.04888	0.860184	1.03702														1798.75	0.95726
1647.25	0.86339	0.85113	0.83039		1647.25	0.86205	0.84884	0.8291		1647.25	0.088405	0.13655	0.093714		1647.25	1.05352	0.864708	1.0282														1798.5	0.95811
1647	0.86358	0.85111	0.83226		1647	0.86231	0.84876	0.83104		1647	0.088851	0.13596	0.096521		1647	1.05134	0.866589	1.01538														1798.25	0.95976
1646.75	0.86486	0.85105	0.83213		1646.75	0.86357	0.84902	0.83089		1646.75	0.09099	0.13652	0.096309		1646.75	1.04101	0.864804	1.01633														1798	0.96144
1646.5	0.86583	0.85092	0.83122		1646.5	0.86444	0.84932	0.82988		1646.5	0.092495	0.13945	0.094833		1646.5	1.03388	0.855581	1.02304														1797.75	0.96235
1646.25	0.86546	0.85072	0.83146		1646.25	0.86391	0.8494	0.82996		1646.25	0.091578	0.14734	0.094958		1646.25	1.03821	0.831679	1.02247														1797.5	0.96229
1646	0.86459	0.85047	0.83182		1646	0.86303	0.84922	0.83032		1646	0.090074	0.15847	0.095471		1646	1.0454	0.800053	1.02013														1797.25	0.9618
1645.75	0.86414	0.85016	0.83098		1645.75	0.8629	0.84889	0.82979		1645.75	0.089846	0.16514	0.094709		1645.75	1.0465	0.782148	1.02361														1797	0.96164
1645.5	0.86311	0.84996	0.82894		1645.5	0.8625	0.84859	0.82835		1645.5	0.089171	0.16303	0.09265		1645.5	1.04978	0.787732	1.03315														1796.75	0.96127
1645.25	0.86082	0.84995	0.82643		1645.25	0.86109	0.84843	0.82668		1645.25	0.086809	0.15661	0.090321		1645.25	1.06144	0.805181	1.04421														1796.5	0.95966
1645	0.85849	0.85001	0.82485		1645	0.85971	0.84848	0.82603		1645	0.084573	0.14908	0.089425		1645	1.07277	0.826581	1.04854														1796.25	0.95712
1644.75	0.85726	0.84997	0.82514		1644.75	0.85948	0.84875	0.82727		1644.75	0.0842	0.14326	0.091135		1644.75	1.07469	0.843875	1.04031														1796	0.95469
1644.5	0.85736	0.85005	0.82633		1644.5	0.86065	0.84944	0.82949		1644.5	0.08609	0.13827	0.094284		1644.5	1.06505	0.859272	1.02556														1795.75	0.95392
1644.25	0.85806	0.85044	0.82642		1644.25	0.86259	0.8507	0.83078		1644.25	0.089323	0.13373	0.096151		1644.25	1.04904	0.873771	1.01705														1795.5	0.95609
1644	0.85683	0.8509	0.82548		1644	0.86285	0.85212	0.83129		1644	0.089769	0.12985	0.096888		1644	1.04687	0.886558	1.01373														1795.25	0.95844
1643.75	0.85307	0.85126	0.82394		1643.75	0.86073	0.85346	0.83134		1643.75	0.086226	0.12677	0.096962		1643.75	1.06436	0.896984	1.0134														1795	0.95867
1643.5	0.84882	0.85176	0.82019		1643.5	0.85816	0.85503	0.82922		1643.5	0.082121	0.12446	0.093897		1643.5	1.08555	0.90497	1.02735														1794.75	0.9584
1643.25	0.84441	0.85273	0.81418		1643.25	0.85552	0.85723	0.82489		1643.25	0.078078	0.12284	0.08788		1643.25	1.10747	0.91066	1.05611														1794.5	0.95927
1643	0.84012	0.85424	0.80903		1643	0.85314	0.86024	0.82157		1643	0.074601	0.12155	0.08352		1643	1.12726	0.915245	1.07821														1794.25	0.96033
1642.75	0.83855	0.85582	0.80879		1642.75	0.85356	0.86351	0.82327		1642.75	0.075211	0.12036	0.08573		1642.75	1.12372	0.919518	1.06687														1794	0.96041
1642.5	0.8462	0.85691	0.81582		1642.5	0.86301	0.86635	0.83204		1642.5	0.090041	0.11932	0.098		1642.5	1.04556	0.923287	1.00877														1793.75	0.95906
1642.25	0.86527	0.85731	0.8298		1642.25	0.88317	0.86859	0.84696		1642.25	0.1313	0.11853	0.12267		1642.25	0.881735	0.926172	0.911262														1793.5	0.9565
1642	0.8787	0.85714	0.84299		1642	0.89597	0.87042	0.85956		1642	0.16611	0.11821	0.14783		1642	0.779604	0.927346	0.830237														1793.25	0.95342
1641.75	0.86303	0.85653	0.83529		1641.75	0.87785	0.87186	0.84962		1641.75	0.11895	0.11822	0.12763		1641.75	0.924636	0.927309	0.894047														1793	0.95042
1641.5	0.84962	0.85575	0.81644		1641.5	0.86208	0.87275	0.82841		1641.5	0.088455	0.11814	0.092733		1641.5	1.05328	0.927603	1.03277														1792.75	0.94878
1641.25	0.85189	0.85508	0.81404		1641.25	0.86224	0.87276	0.82393		1641.25	0.08873	0.11798	0.086596		1641.25	1.05193	0.928192	1.0625														1792.5	0.95006
1641	0.85534	0.85471	0.81928		1641	0.86326	0.87151	0.82686		1641	0.090462	0.11841	0.090575		1641	1.04353	0.926612	1.04299														1792.25	0.95299
1640.75	0.85738	0.85517	0.82413		1640.75	0.86278	0.86985	0.82933		1640.75	0.089649	0.11994	0.094044		1640.75	1.04745	0.921036	1.02667														1792	0.95358
1640.5	0.85809	0.85648	0.8261		1640.5	0.8613	0.86903	0.82919		1640.5	0.087163	0.12249	0.093847		1640.5	1.05967	0.911899	1.02758														1791.75	0.95192
1640.25	0.85928	0.85719	0.827		1640.25	0.86088	0.8676	0.82854		1640.25	0.086468	0.1256	0.092922		1640.25	1.06314	0.90101	1.03188														1791.5	0.9499
1640	0.86205	0.85706	0.8285		1640	0.86275	0.86499	0.82917		1640	0.089587	0.12827	0.093814		1640	1.04776	0.891875	1.02773														1791.25	0.94776
1639.75	0.86467	0.85632	0.83011		1639.75	0.86478	0.86172	0.83021		1639.75	0.093095	0.13039	0.095318		1639.75	1.03107	0.884756	1.02083														1791	0.94618
1639.5	0.86567	0.85523	0.83119		1639.5	0.86511	0.85842	0.83066		1639.5	0.093686	0.13277	0.095971		1639.5	1.02833	0.8769	1.01786														1790.75	0.9477
1639.25	0.86609	0.85397	0.8317		1639.25	0.86474	0.85556	0.83041		1639.25	0.093032	0.13468	0.0956		1639.25	1.03137	0.870697	1.01954														1790.5	0.95139
1639	0.86714	0.85273	0.83186		1639	0.86502	0.85342	0.82984		1639	0.093532	0.13424	0.094774		1639	1.02904	0.872118	1.02331														1790.25	0.95296
1638.75	0.8684	0.85181	0.83237		1638.75	0.86556	0.85191	0.82965		1638.75	0.094481	0.13098	0.094502		1638.75	1.02466	0.882795	1.02456														1790	0.95323
1638.5	0.86937	0.85131	0.83364		1638.5	0.86584	0.85076	0.83025		1638.5	0.094977	0.12649	0.095377		1638.5	1.02238	0.897944	1.02056														1789.75	0.95452
1638.25	0.87048	0.85107	0.83526		1638.25	0.86643	0.84975	0.83138		1638.25	0.096047	0.1226	0.097022		1638.25	1.01752	0.91151	1.01313														1789.5	0.95661
1638	0.87192	0.8509	0.8366		1638	0.86758	0.84882	0.83243		1638	0.098153	0.11975	0.098592		1638	1.0081	0.921724	1.00616														1789.25	0.95826
1637.75	0.87263	0.85079	0.83713		1637.75	0.86819	0.848	0.83287		1637.75	0.09929	0.11697	0.099252		1637.75	1.00309	0.931926	1.00326														1789	0.95976
1637.5	0.87239	0.85078	0.83701		1637.5	0.868	0.84733	0.83279		1637.5	0.098923	0.11404	0.099128		1637.5	1.0047	0.942943	1.0038														1788.75	0.96162
1637.25	0.87293	0.85086	0.83755		1637.25	0.86857	0.84691	0.83337		1637.25	0.1	0.11159	0.1		1637.25	1	0.952375	1														1788.5	0.96256
1637	0.87466	0.85099	0.83904		1637	0.87032	0.84676	0.83488		1637	0.10334	0.10976	0.10231		1637	0.985732	0.959556	0.990082														1788.25	0.96158
1636.75	0.87548	0.85113	0.83974		1636.75	0.87125	0.8468	0.83568		1636.75	0.10515	0.10799	0.10356		1636.75	0.978191	0.966616	0.984808														1788	0.9607
1636.5	0.87459	0.85121	0.83928		1636.5	0.87065	0.84692	0.83551		1636.5	0.10399	0.10624	0.10329		1636.5	0.983008	0.973712	0.985942														1787.75	0.96182
1636.25	0.87377	0.85128	0.83977		1636.25	0.8702	0.84704	0.83634		1636.25	0.10311	0.10497	0.1046		1636.25	0.986699	0.978935	0.980468														1787.5	0.96347
1636	0.8736	0.85139	0.84103		1636	0.87052	0.84716	0.83807		1636	0.10372	0.1043	0.10736		1636	0.984137	0.981716	0.969157														1787.25	0.96413
1635.75	0.87291	0.85154	0.84018		1635.75	0.87062	0.84742	0.83798		1635.75	0.10393	0.10393	0.10723		1635.75	0.983259	0.983259	0.969684														1787	0.9646
1635.5	0.8716	0.85172	0.83739		1635.5	0.87036	0.84788	0.8362		1635.5	0.10342	0.10357	0.10438		1635.5	0.985395	0.984766	0.981383														1786.75	0.96552
1635.25	0.87056	0.85196	0.83556		1635.25	0.87035	0.84849	0.83535		1635.25	0.1034	0.10297	0.10305		1635.25	0.985479	0.987289	0.986952														1786.5	0.96571
1635	0.87022	0.85234	0.83602		1635	0.87095	0.84933	0.83672		1635	0.10457	0.10211	0.10521		1635	0.980593	0.990932	0.977943														1786.25	0.96464
1634.75	0.87068	0.85292	0.8387		1634.75	0.87237	0.85069	0.84033		1634.75	0.10739	0.10132	0.11109		1634.75	0.969036	0.994305	0.954325														1786	0.96357
1634.5	0.87173	0.85351	0.84191		1634.5	0.8742	0.85229	0.84429		1634.5	0.11112	0.1008	0.11787		1634.5	0.954208	0.996539	0.928597														1785.75	0.96319
1634.25	0.87222	0.85373	0.84142		1634.25	0.87478	0.85352	0.84389		1634.25	0.11235	0.10059	0.11718		1634.25	0.949427	0.997445	0.931147														1785.5	0.96268
1634	0.87223	0.85349	0.83943		1634	0.87399	0.8542	0.84113		1634	0.1107	0.10055	0.11243		1634	0.955852	0.997618	0.949118														1785.25	0.96152
1633.75	0.87268	0.85313	0.83957		1633.75	0.87316	0.85479	0.84002		1633.75	0.10898	0.10046	0.11057		1633.75	0.962653	0.998007	0.956363														1785	0.95997
1633.5	0.87327	0.85334	0.84033		1633.5	0.87257	0.85575	0.83966		1633.5	0.1078	0.10023	0.10996		1633.5	0.967381	0.999002	0.958765														1784.75	0.95844
1633.25	0.87351	0.85463	0.83987		1633.25	0.87206	0.85714	0.83847		1633.25	0.10676	0.099907	0.10801		1633.25	0.971591	1.0004	0.966536														1784.5	0.95787
1633	0.87384	0.85629	0.83959		1633	0.87205	0.85802	0.83787		1633	0.10675	0.099481	0.10704		1633	0.971632	1.00226	0.970454														1784.25	0.95869
1632.75	0.87465	0.85734	0.84091		1632.75	0.87278	0.85781	0.83912		1632.75	0.10822	0.098963	0.10907		1632.75	0.965692	1.00453	0.962295														1784	0.96016
1632.5	0.87516	0.85759	0.84277		1632.5	0.87344	0.8569	0.84112		1632.5	0.10957	0.098632	0.1124		1632.5	0.960308	1.00598	0.949234														1783.75	0.96143
1632.25	0.87462	0.85732	0.84361		1632.25	0.87323	0.85589	0.84227		1632.25	0.10914	0.098625	0.11437		1632.25	0.962016	1.00601	0.941688														1783.5	0.96171
1632	0.87413	0.85685	0.84395		1632	0.87309	0.85509	0.84295		1632	0.10885	0.098722	0.11554		1632	0.963172	1.00559	0.937268														1783.25	0.96143
1631.75	0.87435	0.85651	0.84431		1631.75	0.87368	0.85469	0.84366		1631.75	0.11006	0.098659	0.11677		1631.75	0.95837	1.00586	0.932669														1783	0.96154
1631.5	0.87347	0.8565	0.8434		1631.5	0.87342	0.85482	0.84335		1631.5	0.10952	0.098783	0.11623		1631.5	0.960507	1.00532	0.934682														1782.75	0.96229
1631.25	0.87063	0.8568	0.84087		1631.25	0.8716	0.85544	0.8418		1631.25	0.10584	0.099426	0.11356		1631.25	0.97535	1.0025	0.944775														1782.5	0.96327
1631	0.86847	0.85733	0.83917		1631	0.87056	0.85632	0.84119		1631	0.1038	0.10021	0.11253		1631	0.983803	0.999089	0.948732														1782.25	0.96361
1630.75	0.86911	0.85792	0.84015		1630.75	0.87219	0.85727	0.84313		1630.75	0.10703	0.10081	0.11584		1630.75	0.970494	0.996496	0.936141														1782	0.96269
1630.5	0.87235	0.85842	0.84301		1630.5	0.87641	0.85837	0.84693		1630.5	0.1158	0.10166	0.12262		1630.5	0.936291	0.99285	0.911439														1781.75	0.96124
1630.25	0.87492	0.85873	0.84436		1630.25	0.88023	0.85969	0.84948		1630.25	0.12434	0.10331	0.12736		1630.25	0.905389	0.985858	0.894967														1781.5	0.96048
1630	0.8725	0.85869	0.84246		1630	0.87956	0.86076	0.84928		1630	0.12281	0.10595	0.12698		1630	0.910766	0.974899	0.896265														1781.25	0.95974
1629.75	0.86692	0.85834	0.83956		1629.75	0.87561	0.86137	0.84798		1629.75	0.1141	0.10879	0.12455		1629.75	0.942714	0.963411	0.904656														1781	0.95807
1629.5	0.86539	0.85822	0.83919		1629.5	0.8743	0.86221	0.84783		1629.5	0.11134	0.11078	0.12427		1629.5	0.953349	0.955539	0.905634														1780.75	0.95598
1629.25	0.86935	0.85911	0.84188		1629.25	0.87685	0.86432	0.84914		1629.25	0.11676	0.11151	0.12672		1629.25	0.932706	0.952686	0.897155														1780.5	0.95492
1629	0.87348	0.86097	0.84491		1629	0.8788	0.86793	0.85005		1629	0.12109	0.11119	0.12846		1629	0.916892	0.953934	0.891232														1780.25	0.95658
1628.75	0.87527	0.8631	0.8464		1628.75	0.87855	0.87176	0.84958		1628.75	0.12052	0.11007	0.12755		1628.75	0.918941	0.958331	0.89432														1780	0.95979
1628.5	0.87565	0.86479	0.84648		1628.5	0.87747	0.87369	0.84824		1628.5	0.11813	0.10865	0.12504		1628.5	0.92764	0.96397	0.902951														1779.75	0.96098
1628.25	0.87561	0.86597	0.84643		1628.25	0.87643	0.87344	0.84723		1628.25	0.11586	0.10744	0.12317		1628.25	0.936066	0.968834	0.909495														1779.5	0.95979
1628	0.87584	0.86685	0.84759		1628	0.87588	0.87213	0.84762		1628	0.11468	0.10679	0.12389		1628	0.940512	0.971469	0.906964														1779.25	0.95819
1627.75	0.87705	0.86735	0.8497		1627.75	0.87634	0.87061	0.84901		1627.75	0.11566	0.10761	0.12647		1627.75	0.936817	0.968147	0.898012														1779	0.95759
1627.5	0.87942	0.86723	0.8516		1627.5	0.878	0.86904	0.85022		1627.5	0.11929	0.10997	0.12878		1627.5	0.923396	0.958726	0.890152														1778.75	0.95795
1627.25	0.88202	0.86668	0.85272		1627.25	0.88003	0.8675	0.8508		1627.25	0.12388	0.11129	0.12988		1627.25	0.906999	0.953544	0.886458														1778.5	0.95888
1627	0.88364	0.86607	0.85317		1627	0.88134	0.86611	0.85095		1627	0.12694	0.11105	0.13018		1627	0.896402	0.954481	0.885456														1778.25	0.96014
1626.75	0.88425	0.86579	0.85384		1626.75	0.88193	0.86508	0.8516		1626.75	0.12832	0.10969	0.13144		1626.75	0.891706	0.959833	0.881272														1778	0.96115
1626.5	0.88453	0.86601	0.85551		1626.5	0.88241	0.86461	0.85346		1626.5	0.12946	0.10771	0.13511		1626.5	0.887864	0.967744	0.869313														1777.75	0.96121
1626.25	0.88534	0.86645	0.85749		1626.25	0.88353	0.8645	0.85574		1626.25	0.13219	0.10548	0.13974		1626.25	0.878801	0.97683	0.854679														1777.5	0.96069
1626	0.88696	0.86673	0.85856		1626	0.88549	0.86448	0.85714		1626	0.13705	0.10332	0.14266		1626	0.863121	0.985816	0.845698														1777.25	0.96062
1625.75	0.88806	0.86665	0.85848		1625.75	0.88686	0.86438	0.85732		1625.75	0.14056	0.10173	0.14304		1625.75	0.852138	0.992551	0.844542														1777	0.96134
1625.5	0.88737	0.86638	0.85757		1625.5	0.88647	0.86431	0.8567		1625.5	0.13955	0.10088	0.14174		1625.5	0.85527	0.996195	0.848508														1776.75	0.96244
1625.25	0.88556	0.86621	0.8567		1625.25	0.8852	0.86444	0.85635		1625.25	0.13634	0.10049	0.14101		1625.25	0.865377	0.997877	0.85075														1776.5	0.96291
1625	0.88373	0.86645	0.85639		1625	0.8844	0.86502	0.85703		1625	0.13432	0.1002	0.14242		1625	0.871859	0.999132	0.846429														1776.25	0.96192
1624.75	0.88138	0.86712	0.85532		1624.75	0.88356	0.86595	0.85744		1624.75	0.13226	0.10002	0.14329		1624.75	0.878571	0.999913	0.843784														1776	0.95989
1624.5	0.87818	0.86804	0.85268		1624.5	0.88218	0.86716	0.85656		1624.5	0.12893	0.1	0.14145		1624.5	0.889646	1	0.849397														1775.75	0.95767
1624.25	0.8757	0.86902	0.85082		1624.25	0.88137	0.86867	0.85632		1624.25	0.127	0.10014	0.14094		1624.25	0.896196	0.999392	0.850966														1775.5	0.95618
1624	0.87605	0.86989	0.85281		1624	0.88274	0.87055	0.85932		1624	0.13027	0.10036	0.14732		1624	0.885156	0.998439	0.831738														1775.25	0.95672
1623.75	0.88143	0.87052	0.8594		1623.75	0.88824	0.87267	0.86605		1623.75	0.14419	0.10059	0.16256		1623.75	0.841065	0.997445	0.788986														1775	0.95841
1623.5	0.89222	0.87081	0.86877		1623.5	0.89838	0.87478	0.87477		1623.5	0.17356	0.10072	0.18449		1623.5	0.76055	0.996884	0.734027														1774.75	0.95938
1623.25	0.89601	0.87055	0.87206		1623.25	0.90193	0.87618	0.87782		1623.25	0.18511	0.10085	0.19279		1623.25	0.73257	0.996324	0.714915														1774.5	0.95944
1623	0.88387	0.86954	0.8633		1623	0.89088	0.87619	0.87014		1623	0.15134	0.10103	0.17253		1623	0.820046	0.99555	0.763135														1774.25	0.9589
1622.75	0.87838	0.86797	0.85774		1622.75	0.88634	0.87468	0.86551		1622.75	0.13922	0.10128	0.16129		1622.75	0.856298	0.994476	0.792393														1774	0.95773
1622.5	0.88183	0.86695	0.8583		1622.5	0.88938	0.87293	0.86564		1622.5	0.14723	0.10158	0.16161		1622.5	0.832004	0.993192	0.791532														1773.75	0.95605
1622.25	0.88415	0.86886	0.85872		1622.25	0.89018	0.87459	0.86458		1622.25	0.14942	0.102	0.15912		1622.25	0.825591	0.9914	0.798275														1773.5	0.95366
1622	0.88479	0.87447	0.85871		1622	0.88889	0.8814	0.86268		1622	0.14591	0.10265	0.15476		1622	0.835915	0.988641	0.810341														1773.25	0.95063
1621.75	0.88629	0.88024	0.86001		1621.75	0.88861	0.88822	0.86226		1621.75	0.14516	0.10365	0.1538		1621.75	0.838153	0.984431	0.813044														1773	0.9485
1621.5	0.88863	0.88351	0.86239		1621.5	0.88944	0.89107	0.86317		1621.5	0.1474	0.10466	0.15588		1621.5	0.831503	0.980219	0.80721														1772.75	0.94882
1621.25	0.89079	0.88446	0.86479		1621.25	0.89027	0.8905	0.86429		1621.25	0.14967	0.10505	0.15843		1621.25	0.824865	0.978604	0.800163														1772.5	0.95035
1621	0.89216	0.88414	0.86672		1621	0.8905	0.88823	0.8651		1621	0.15029	0.10463	0.16033		1621	0.82307	0.980344	0.794985														1772.25	0.94948
1620.75	0.89265	0.88341	0.86811		1620.75	0.8901	0.88572	0.86564		1620.75	0.14921	0.10401	0.16159		1620.75	0.826202	0.982925	0.791586														1772	0.94589
1620.5	0.89334	0.88271	0.8695		1620.5	0.89025	0.88352	0.8665		1620.5	0.14962	0.10437	0.16363		1620.5	0.82501	0.981424	0.786137														1771.75	0.94227
1620.25	0.89531	0.88217	0.8714		1620.25	0.89204	0.88166	0.86822		1620.25	0.1546	0.10665	0.16779		1620.25	0.810791	0.972039	0.775234														1771.5	0.93852
1620	0.89787	0.88171	0.87304		1620	0.89461	0.88007	0.86987		1620	0.16204	0.10963	0.17186		1620	0.790378	0.960071	0.764825														1771.25	0.93484
1619.75	0.89971	0.88123	0.87351		1619.75	0.89641	0.87872	0.8703		1619.75	0.16745	0.11157	0.17293		1619.75	0.776115	0.952453	0.76213														1771	0.93761
1619.5	0.90043	0.88088	0.87376		1619.5	0.89698	0.87785	0.87042		1619.5	0.16921	0.11204	0.17324		1619.5	0.771574	0.950627	0.761352														1770.75	0.94509
1619.25	0.90032	0.88091	0.875		1619.25	0.89667	0.87769	0.87145		1619.25	0.16825	0.11152	0.17586		1619.25	0.774045	0.952647	0.754833														1770.5	0.94744
1619	0.90028	0.88128	0.87657		1619	0.89638	0.87807	0.87277		1619	0.16736	0.11065	0.17924		1619	0.776348	0.956049	0.746565														1770.25	0.94811
1618.75	0.90106	0.88184	0.87752		1618.75	0.8969	0.8786	0.87347		1618.75	0.16896	0.11005	0.18107		1618.75	0.772216	0.95841	0.742153														1770	0.95165
1618.5	0.90236	0.88245	0.87831		1618.5	0.89801	0.87908	0.87409		1618.5	0.17242	0.11002	0.18269		1618.5	0.763412	0.958528	0.738285														1769.75	0.95552
1618.25	0.90346	0.883	0.87945		1618.25	0.89907	0.87943	0.87518		1618.25	0.17577	0.11057	0.1856		1618.25	0.755055	0.956363	0.731422														1769.5	0.9564
1618	0.904	0.88356	0.88044		1618	0.89958	0.87973	0.87613		1618	0.17739	0.11156	0.18815		1618	0.751071	0.952491	0.725496														1769.25	0.95575
1617.75	0.90389	0.8842	0.88085		1617.75	0.89939	0.88012	0.87646		1617.75	0.17677	0.11265	0.18904		1617.75	0.752591	0.948269	0.723446														1769	0.95613
1617.5	0.90364	0.88477	0.88116		1617.5	0.8992	0.88052	0.87684		1617.5	0.17618	0.11359	0.19008		1617.5	0.754043	0.94466	0.721064														1768.75	0.95627
1617.25	0.90348	0.88518	0.88145		1617.25	0.89944	0.88088	0.8775		1617.25	0.17696	0.11418	0.19192		1617.25	0.752125	0.94241	0.71688														1768.5	0.95427
1617	0.90275	0.88564	0.88053		1617	0.89941	0.8813	0.87727		1617	0.17685	0.1141	0.19126		1617	0.752395	0.942714	0.718376														1768.25	0.95179
1616.75	0.90125	0.88634	0.87828		1616.75	0.89884	0.88192	0.87593		1616.75	0.17502	0.11343	0.18762		1616.75	0.756912	0.945272	0.726721														1768	0.95267
1616.5	0.90009	0.88729	0.87672		1616.5	0.89873	0.88408	0.8754		1616.5	0.17467	0.11322	0.18617		1616.5	0.757782	0.946077	0.73009														1767.75	0.95494
1616.25	0.90038	0.88836	0.87786		1616.25	0.89996	0.88548	0.87745		1616.25	0.17862	0.11489	0.19177		1616.25	0.74807	0.939718	0.717219														1767.5	0.95349
1616	0.90198	0.88943	0.88134		1616	0.902	0.88689	0.88137		1616	0.18537	0.11849	0.20287		1616	0.731961	0.926318	0.692782														1767.25	0.95356
1615.75	0.90362	0.89036	0.88414		1615.75	0.90337	0.88827	0.8839		1615.75	0.19003	0.12274	0.21036		1615.75	0.721178	0.911014	0.677037														1767	0.95747
1615.5	0.90471	0.89104	0.8847		1615.5	0.90366	0.88968	0.88367		1615.5	0.191	0.12621	0.20966		1615.5	0.718967	0.898906	0.678484														1766.75	0.9603
1615.25	0.90545	0.89158	0.8841		1615.25	0.90352	0.89107	0.88221		1615.25	0.19051	0.12868	0.20533		1615.25	0.720082	0.890489	0.687548														1766.5	0.95937
1615	0.90604	0.89245	0.88421		1615	0.90355	0.89248	0.88178		1615	0.19063	0.13056	0.20406		1615	0.719809	0.88419	0.690242														1766.25	0.95839
1614.75	0.90604	0.89371	0.88459		1614.75	0.90345	0.89347	0.88206		1614.75	0.1903	0.13164	0.20489		1614.75	0.720561	0.880612	0.688479														1766	0.95957
1614.5	0.90498	0.89483	0.88346		1614.5	0.90265	0.89379	0.88119		1614.5	0.18755	0.13138	0.20235		1614.5	0.726883	0.881471	0.693897														1765.75	0.96105
1614.25	0.9033	0.89549	0.88126		1614.25	0.9015	0.89357	0.87951		1614.25	0.18369	0.13019	0.19752		1614.25	0.735914	0.885422	0.704389														1765.5	0.96147
1614	0.90243	0.89567	0.8804		1614	0.90134	0.89321	0.87933		1614	0.18314	0.1289	0.19702		1614	0.737217	0.889747	0.70549														1765.25	0.96135
1613.75	0.90315	0.89558	0.88188		1613.75	0.90261	0.89302	0.88135		1613.75	0.18743	0.12829	0.20282		1613.75	0.727161	0.891807	0.692889														1765	0.96101
1613.5	0.90482	0.89551	0.88442		1613.5	0.90432	0.8932	0.88394		1613.5	0.19332	0.12875	0.21047		1613.5	0.713723	0.890253	0.67681														1764.75	0.96025
1613.25	0.90664	0.89571	0.88687		1613.25	0.90568	0.89393	0.88593		1613.25	0.1981	0.12971	0.21654		1613.25	0.703116	0.887027	0.664462														1764.5	0.95953
1613	0.90824	0.89634	0.88879		1613	0.90654	0.89524	0.88712		1613	0.2012	0.1303	0.22026		1613	0.696372	0.885056	0.657064														1764.25	0.95973
1612.75	0.90948	0.89735	0.88988		1612.75	0.90703	0.89682	0.88747		1612.75	0.20299	0.13013	0.22136		1612.75	0.692525	0.885623	0.654901														1764	0.96105
1612.5	0.9104	0.89855	0.89016		1612.5	0.90729	0.89806	0.88712		1612.5	0.20396	0.12956	0.22025		1612.5	0.690455	0.887529	0.657084														1763.75	0.96294
1612.25	0.91138	0.89948	0.89023		1612.25	0.90777	0.89852	0.8867		1612.25	0.20571	0.12919	0.21893		1612.25	0.686745	0.888771	0.659695														1763.5	0.96403
1612	0.91262	0.89993	0.89064		1612	0.90861	0.89824	0.88673		1612	0.20885	0.1297	0.21901		1612	0.680166	0.88706	0.659536														1763.25	0.96309
1611.75	0.91355	0.90021	0.89136		1611.75	0.90926	0.89778	0.88718		1611.75	0.21131	0.13113	0.22043		1611.75	0.67508	0.882298	0.656729														1763	0.96053
1611.5	0.91368	0.90062	0.89213		1611.5	0.90923	0.89754	0.88779		1611.5	0.21119	0.13314	0.22236		1611.5	0.675327	0.875691	0.652943														1762.75	0.95798
1611.25	0.91363	0.901	0.89316		1611.25	0.90913	0.89743	0.88876		1611.25	0.21082	0.13529	0.22546		1611.25	0.676088	0.868734	0.64693														1762.5	0.9558
1611	0.9138	0.90117	0.89427		1611	0.90941	0.89721	0.88996		1611	0.21186	0.13724	0.22932		1611	0.673951	0.862519	0.639558														1762.25	0.95323
1610.75	0.9133	0.90126	0.89472		1610.75	0.9092	0.89704	0.8907		1610.75	0.21106	0.13865	0.23173		1610.75	0.675594	0.85808	0.635018														1762	0.95147
1610.5	0.91175	0.90146	0.89418		1610.5	0.90818	0.89708	0.89068		1610.5	0.20723	0.13931	0.23166		1610.5	0.683547	0.856018	0.635149														1761.75	0.95329
1610.25	0.91059	0.90189	0.89285		1610.25	0.90779	0.89745	0.89011		1610.25	0.2058	0.13872	0.22981		1610.25	0.686555	0.857861	0.638631														1761.5	0.95669
1610	0.91103	0.90254	0.8918		1610	0.90912	0.8982	0.88993		1610	0.21076	0.13646	0.22921		1610	0.676212	0.864995	0.639766														1761.25	0.95485
1609.75	0.91217	0.90332	0.89313		1609.75	0.91091	0.89926	0.8919		1609.75	0.21766	0.13297	0.23572		1609.75	0.662221	0.876246	0.627604														1761	0.95207
1609.5	0.91304	0.90405	0.89603		1609.5	0.91191	0.9005	0.89493		1609.5	0.2216	0.13078	0.24603		1609.5	0.65443	0.883459	0.609012														1760.75	0.95332
1609.25	0.91401	0.90458	0.89614		1609.25	0.91243	0.90181	0.89459		1609.25	0.22365	0.13493	0.24485		1609.25	0.650431	0.869891	0.6111														1760.5	0.95558
1609	0.91495	0.90494	0.89393		1609	0.9127	0.90303	0.89174		1609	0.22476	0.1479	0.23518		1609	0.648281	0.830032	0.6286														1760.25	0.95645
1608.75	0.91513	0.90531	0.89416		1608.75	0.91258	0.90406	0.89168		1608.75	0.22427	0.16242	0.23497		1608.75	0.649229	0.78936	0.628988														1760	0.95632
1608.5	0.91462	0.90589	0.89705		1608.5	0.91232	0.90477	0.89479		1608.5	0.22323	0.17125	0.24555		1608.5	0.651247	0.766369	0.60986														1759.75	0.9562
1608.25	0.91415	0.9067	0.89849		1608.25	0.91241	0.90513	0.89678		1608.25	0.22359	0.17387	0.25254		1608.25	0.650548	0.759775	0.59767														1759.5	0.95789
1608	0.91435	0.90762	0.89763		1608	0.91306	0.90539	0.89637		1608	0.2262	0.17298	0.25106		1608	0.645507	0.762004	0.600222														1759.25	0.96096
1607.75	0.91545	0.90854	0.8972		1607.75	0.9141	0.90601	0.89588		1607.75	0.23045	0.17096	0.24935		1607.75	0.637423	0.767105	0.603191														1759	0.96155
1607.5	0.91669	0.90939	0.89806		1607.5	0.91472	0.9071	0.89613		1607.5	0.23301	0.16904	0.25022		1607.5	0.632625	0.772011	0.601678														1758.75	0.95852
1607.25	0.91723	0.91009	0.89926		1607.25	0.91438	0.90835	0.89646		1607.25	0.23159	0.16758	0.2514		1607.25	0.63528	0.775778	0.599635														1758.5	0.95561
1607	0.91767	0.91062	0.90017		1607	0.914	0.90933	0.89657		1607	0.23003	0.16634	0.25178		1607	0.638216	0.779003	0.598979														1758.25	0.95553
1606.75	0.91897	0.91103	0.90046		1606.75	0.91472	0.90969	0.8963		1606.75	0.23302	0.16505	0.25082		1606.75	0.632607	0.782384	0.600638														1758	0.95684
1606.5	0.92056	0.91134	0.9008		1606.5	0.91586	0.90939	0.89619		1606.5	0.2378	0.16413	0.25044		1606.5	0.623788	0.784812	0.601296														1757.75	0.95722
1606.25	0.92142	0.91157	0.90193		1606.25	0.91615	0.90873	0.89677		1606.25	0.23905	0.16418	0.2525		1606.25	0.621511	0.78468	0.597739														1757.5	0.95539
1606	0.92197	0.91175	0.90314		1606	0.91602	0.90811	0.89731		1606	0.2385	0.16517	0.25444		1606	0.622512	0.782069	0.594415														1757.25	0.95236
1605.75	0.92288	0.91198	0.90341		1605.75	0.91627	0.90776	0.89693		1605.75	0.23955	0.16669	0.25308		1605.75	0.620604	0.77809	0.596742														1757	0.95064
1605.5	0.92346	0.91222	0.90312		1605.5	0.91649	0.90755	0.89631		1605.5	0.24051	0.16833	0.25085		1605.5	0.618867	0.773838	0.600586														1756.75	0.95133
1605.25	0.92307	0.91244	0.90304		1605.25	0.91624	0.90722	0.89635		1605.25	0.23942	0.16984	0.25101		1605.25	0.62084	0.76996	0.600309														1756.5	0.95298
1605	0.92273	0.91272	0.90314		1605	0.91642	0.90683	0.89695		1605	0.24018	0.17136	0.25316		1605	0.619463	0.766091	0.596605														1756.25	0.95381
1604.75	0.92332	0.91311	0.9033		1604.75	0.91758	0.90656	0.89769		1604.75	0.24521	0.17315	0.25578		1604.75	0.610462	0.761578	0.592133														1756	0.95408
1604.5	0.92411	0.91354	0.90418		1604.5	0.91863	0.90665	0.89882		1604.5	0.24984	0.17476	0.25988		1604.5	0.602338	0.757558	0.585227														1755.75	0.95464
1604.25	0.92429	0.91394	0.90575		1604.25	0.91864	0.90717	0.90021		1604.25	0.24987	0.1759	0.26502		1604.25	0.602286	0.754734	0.576721														1755.5	0.95592
1604	0.92426	0.91422	0.90637		1604	0.91833	0.90796	0.90056		1604	0.24853	0.1772	0.26631		1604	0.604621	0.751536	0.574613														1755.25	0.95745
1603.75	0.92427	0.91441	0.90517		1603.75	0.91838	0.90872	0.8994		1603.75	0.24873	0.17922	0.26202		1603.75	0.604272	0.746614	0.581666														1755	0.95843
1603.5	0.92366	0.91464	0.90357		1603.5	0.91826	0.90921	0.89828		1603.5	0.24819	0.18196	0.25793		1603.5	0.605216	0.740024	0.588498														1754.75	0.95848
1603.25	0.92239	0.91503	0.90275		1603.25	0.91786	0.90943	0.89832		1603.25	0.24645	0.18512	0.25808		1603.25	0.608271	0.732547	0.588246														1754.5	0.95774
1603	0.92184	0.91562	0.90251		1603	0.9183	0.90975	0.89904		1603	0.2484	0.18833	0.2607		1603	0.604848	0.72508	0.583859														1754.25	0.95737
1602.75	0.92268	0.91633	0.90264		1602.75	0.91983	0.91049	0.89985		1602.75	0.25522	0.19116	0.26368		1602.75	0.593085	0.718603	0.578923														1754	0.95809
1602.5	0.92362	0.91694	0.90353		1602.5	0.92086	0.91158	0.90083		1602.5	0.25994	0.19324	0.26732		1602.5	0.585127	0.713903	0.572969														1753.75	0.95876
1602.25	0.92366	0.91737	0.90436		1602.25	0.92056	0.91287	0.90132		1602.25	0.25855	0.19491	0.26918		1602.25	0.587455	0.710166	0.569957														1753.5	0.95829
1602	0.92277	0.91779	0.90353		1602	0.91949	0.91427	0.90033		1602	0.2537	0.19766	0.26545		1602	0.59568	0.704081	0.576017														1753.25	0.95721
1601.75	0.92138	0.91836	0.90158		1601.75	0.91849	0.91553	0.89875		1601.75	0.24922	0.20166	0.25964		1601.75	0.603417	0.69538	0.585628														1753	0.95627
1601.5	0.92032	0.91903	0.90099		1601.5	0.91834	0.91628	0.89905		1601.5	0.24857	0.2053	0.26074		1601.5	0.604551	0.687611	0.583792														1752.75	0.95618
1601.25	0.92017	0.91958	0.9025		1601.25	0.91927	0.91649	0.90161		1601.25	0.25271	0.20746	0.27028		1601.25	0.597378	0.683066	0.568186														1752.5	0.95653
1601	0.92092	0.9198	0.90403		1601	0.92055	0.91653	0.90368		1601	0.25852	0.20806	0.27819		1601	0.587506	0.681811	0.555658														1752.25	0.95481
1600.75	0.92225	0.91973	0.9047		1600.75	0.92159	0.91684	0.90405		1600.75	0.26333	0.20775	0.27965		1600.75	0.5795	0.682459	0.553385														1752	0.95067
1600.5	0.92401	0.9197	0.90541		1600.5	0.92253	0.91773	0.90396		1600.5	0.26773	0.20752	0.27929		1600.5	0.572303	0.68294	0.553945														1751.75	0.94735
1600.25	0.9257	0.91999	0.90639		1600.25	0.9232	0.91909	0.90394		1600.25	0.27094	0.2082	0.27924		1600.25	0.567127	0.681519	0.554022														1751.5	0.94673
1600	0.92669	0.92062	0.90737		1600	0.92329	0.92025	0.90404		1600	0.27137	0.21027	0.2796		1600	0.566438	0.677223	0.553463														1751.25	0.94835
1599.75	0.92697	0.92131	0.9079		1599.75	0.92289	0.92065	0.9039		1599.75	0.26945	0.21369	0.27908		1599.75	0.569522	0.670216	0.554271														1751	0.95075
1599.5	0.92691	0.92174	0.90772		1599.5	0.92239	0.92026	0.90329		1599.5	0.26707	0.21779	0.27668		1599.5	0.573375	0.661962	0.558022														1750.75	0.95131
1599.25	0.92695	0.92193	0.90747		1599.25	0.92228	0.91944	0.9029		1599.25	0.26656	0.22102	0.27518		1599.25	0.574205	0.655568	0.560383														1750.5	0.94944
1599	0.9273	0.92209	0.90788		1599	0.92277	0.91871	0.90344		1599	0.26891	0.2226	0.27729		1599	0.570393	0.652475	0.557066														1750.25	0.94812
1598.75	0.92754	0.9223	0.90849		1598.75	0.92324	0.91823	0.90428		1598.75	0.27115	0.22359	0.28057		1598.75	0.56679	0.650548	0.551959														1750	0.94717
1598.5	0.92722	0.92254	0.90871		1598.5	0.92303	0.91803	0.9046		1598.5	0.27013	0.22505	0.2818		1598.5	0.568427	0.647721	0.550059														1749.75	0.94504
1598.25	0.92676	0.92281	0.9087		1598.25	0.92248	0.91815	0.90451		1598.25	0.26753	0.22641	0.28147		1598.25	0.572628	0.645104	0.550568														1749.5	0.94175
1598	0.92676	0.92307	0.90892		1598	0.92231	0.91856	0.90455		1598	0.26671	0.22702	0.28161		1598	0.573961	0.643936	0.550352														1749.25	0.9386
1597.75	0.92742	0.92339	0.90988		1597.75	0.92284	0.91912	0.90539		1597.75	0.26923	0.22736	0.28492		1597.75	0.569877	0.643286	0.545277														1749	0.93716
1597.5	0.92842	0.92383	0.91144		1597.5	0.9239	0.91965	0.90701		1597.5	0.27434	0.22808	0.29143		1597.5	0.561711	0.641913	0.535466														1748.75	0.93834
1597.25	0.92898	0.92425	0.91197		1597.25	0.92457	0.91999	0.90765		1597.25	0.27761	0.22962	0.29405		1597.25	0.556565	0.63899	0.531579														1748.5	0.941
1597	0.92859	0.92459	0.91076		1597	0.92425	0.92014	0.9065		1597	0.27602	0.23201	0.28939		1597	0.559059	0.634493	0.538516														1748.25	0.94143
1596.75	0.92749	0.92483	0.90975		1596.75	0.92329	0.92026	0.90563		1596.75	0.27136	0.23486	0.28589		1596.75	0.566454	0.629191	0.543801														1748	0.94023
1596.5	0.92661	0.92507	0.9104		1596.5	0.92272	0.92057	0.90657		1596.5	0.26863	0.23757	0.28967		1596.5	0.570845	0.624208	0.538096														1747.75	0.93983
1596.25	0.92759	0.92555	0.91184		1596.25	0.92401	0.92116	0.90833		1596.25	0.27486	0.23959	0.29683		1596.25	0.560888	0.620531	0.527492														1747.5	0.939
1596	0.93001	0.92629	0.91273		1596	0.92656	0.92196	0.90934		1596	0.2875	0.24092	0.30104		1596	0.541362	0.618127	0.521376														1747.25	0.93674
1595.75	0.93112	0.92696	0.91248		1595.75	0.9274	0.92276	0.90884		1595.75	0.2918	0.24233	0.29893		1595.75	0.534915	0.615593	0.52443														1747	0.93554
1595.5	0.93056	0.92723	0.91179		1595.5	0.92636	0.92333	0.90766		1595.5	0.28648	0.24457	0.2941		1595.5	0.542906	0.611597	0.531505														1746.75	0.93803
1595.25	0.93079	0.92706	0.91232		1595.25	0.92631	0.92348	0.90792		1595.25	0.28623	0.24768	0.29515		1595.25	0.543285	0.606109	0.529957														1746.5	0.94189
1595	0.93226	0.92664	0.914		1595	0.92778	0.92319	0.90961		1595	0.29375	0.25129	0.30215		1595	0.532022	0.599825	0.519777														1746.25	0.94434
1594.75	0.93318	0.92631	0.9151		1594.75	0.92867	0.92262	0.91067		1594.75	0.29842	0.25496	0.30666		1594.75	0.525172	0.593528	0.513343														1746	0.94452
1594.5	0.9331	0.92633	0.91518		1594.5	0.92833	0.92214	0.9105		1594.5	0.29661	0.25838	0.30591		1594.5	0.527814	0.587741	0.514406														1745.75	0.94332
1594.25	0.93286	0.92669	0.91517		1594.25	0.92763	0.92223	0.91004		1594.25	0.29301	0.26121	0.30397		1594.25	0.533118	0.58301	0.517169														1745.5	0.94414
1594	0.93306	0.92717	0.91546		1594	0.92743	0.92271	0.90994		1594	0.29196	0.26339	0.30354		1594	0.534677	0.579401	0.517784														1745.25	0.94732
1593.75	0.93396	0.92743	0.91601		1593.75	0.92823	0.92295	0.91039		1593.75	0.2961	0.26511	0.30547		1593.75	0.528562	0.576574	0.515031														1745	0.94883
1593.5	0.93479	0.92739	0.91665		1593.5	0.92932	0.92264	0.91128		1593.5	0.30184	0.2664	0.30925		1593.5	0.520223	0.574466	0.50969														1744.75	0.94795
1593.25	0.93459	0.92729	0.91719		1593.25	0.9295	0.9221	0.91219		1593.25	0.30281	0.26733	0.31318		1593.25	0.51883	0.572952	0.504206														1744.5	0.94688
1593	0.93418	0.92723	0.91774		1593	0.92936	0.92163	0.91301		1593	0.30206	0.26811	0.31676		1593	0.519907	0.571687	0.49927														1744.25	0.94674
1592.75	0.93483	0.92717	0.91849		1592.75	0.93002	0.92149	0.91376		1592.75	0.30557	0.26906	0.32006		1592.75	0.514889	0.570151	0.494769														1744	0.94639
1592.5	0.93571	0.92734	0.91887		1592.5	0.93066	0.92191	0.91391		1592.5	0.30902	0.27006	0.3207		1592.5	0.510013	0.56854	0.493901														1743.75	0.94522
1592.25	0.9355	0.92796	0.91837		1592.25	0.93012	0.92291	0.91308		1592.25	0.30611	0.27101	0.31707		1592.25	0.514122	0.567015	0.498845														1743.5	0.9433
1592	0.93468	0.9287	0.91758		1592	0.92908	0.92392	0.91208		1592	0.30058	0.27219	0.31271		1592	0.52204	0.565128	0.504858														1743.25	0.94093
1591.75	0.93425	0.92909	0.91735		1591.75	0.92868	0.92431	0.91189		1591.75	0.29847	0.27384	0.31187		1591.75	0.525099	0.562503	0.506026														1743	0.93957
1591.5	0.93465	0.92907	0.91777		1591.5	0.92922	0.92405	0.91244		1591.5	0.30131	0.27569	0.31425		1591.5	0.520986	0.559579	0.502725														1742.75	0.94143
1591.25	0.93576	0.92885	0.91848		1591.25	0.93039	0.92351	0.91321		1591.25	0.30755	0.27742	0.31764		1591.25	0.512084	0.556862	0.498065														1742.5	0.94567
1591	0.93662	0.92866	0.9193		1591	0.93127	0.9231	0.91405		1591	0.31238	0.27862	0.32136		1591	0.505317	0.554988	0.493008														1742.25	0.94874
1590.75	0.93649	0.92869	0.91985		1590.75	0.9312	0.92315	0.91465		1590.75	0.31196	0.27945	0.324		1590.75	0.505901	0.553696	0.489455														1742	0.94937
1590.5	0.93582	0.92896	0.91924		1590.5	0.9305	0.92356	0.91401		1590.5	0.30814	0.28046	0.32114		1590.5	0.511252	0.552129	0.493306														1741.75	0.94934
1590.25	0.93527	0.92934	0.91759		1590.25	0.92984	0.92401	0.91226		1590.25	0.30463	0.28215	0.3135		1590.25	0.516227	0.54952	0.503762														1741.5	0.95009
1590	0.93506	0.92968	0.91713		1590	0.92964	0.92438	0.91182		1590	0.30357	0.28476	0.31158		1590	0.517741	0.545521	0.50643														1741.25	0.95119
1589.75	0.93527	0.92989	0.91876		1589.75	0.93012	0.92463	0.9137		1589.75	0.30611	0.28793	0.3198		1589.75	0.514122	0.540713	0.495122														1741	0.95159
1589.5	0.9361	0.93013	0.92045		1589.5	0.93134	0.92484	0.91577		1589.5	0.31277	0.29068	0.32906		1589.5	0.504775	0.536585	0.482725														1740.75	0.94976
1589.25	0.93714	0.93051	0.92074		1589.25	0.93274	0.92511	0.91641		1589.25	0.32049	0.29262	0.33199		1589.25	0.494186	0.533696	0.478875														1740.5	0.94538
1589	0.93738	0.9308	0.92024		1589	0.93311	0.92541	0.91605		1589	0.32259	0.29455	0.33032		1589	0.491349	0.530841	0.481065														1740.25	0.94167
1588.75	0.93672	0.93088	0.91981		1588.75	0.93235	0.92576	0.91552		1588.75	0.31831	0.29715	0.32791		1588.75	0.49715	0.527024	0.484245														1740	0.94201
1588.5	0.93619	0.93091	0.91995		1588.5	0.93163	0.92617	0.91546		1588.5	0.31433	0.30025	0.32768		1588.5	0.502614	0.522517	0.48455														1739.75	0.94532
1588.25	0.93616	0.93105	0.92023		1588.25	0.93143	0.92667	0.91558		1588.25	0.31324	0.30282	0.32819		1588.25	0.504123	0.518815	0.483875														1739.5	0.94691
1588	0.93611	0.93126	0.91947		1588	0.93119	0.92701	0.91464		1588	0.31194	0.30385	0.32399		1588	0.505929	0.517341	0.489468														1739.25	0.94459
1587.75	0.93607	0.93148	0.91856		1587.75	0.93104	0.92714	0.91362		1587.75	0.31111	0.30353	0.31945		1587.75	0.507086	0.517798	0.495597														1739	0.9422
1587.5	0.93652	0.93167	0.91973		1587.5	0.93157	0.92713	0.91487		1587.5	0.31401	0.30341	0.32501		1587.5	0.503057	0.51797	0.488103														1738.75	0.94389
1587.25	0.93729	0.93173	0.92156		1587.25	0.9326	0.92702	0.91694		1587.25	0.31973	0.30474	0.33443		1587.25	0.495217	0.516071	0.475695														1738.5	0.94751
1587	0.93778	0.93162	0.92065		1587	0.93341	0.92672	0.91636		1587	0.32432	0.30774	0.33176		1587	0.489026	0.511816	0.479176														1738.25	0.94791
1586.75	0.93777	0.93148	0.91876		1586.75	0.93362	0.92648	0.91469		1586.75	0.32548	0.31104	0.32418		1586.75	0.487476	0.507184	0.489214														1738	0.94502
1586.5	0.93738	0.93158	0.91978		1586.5	0.93325	0.92666	0.91573		1586.5	0.32341	0.31312	0.32889		1586.5	0.490247	0.504289	0.482949														1737.75	0.943
1586.25	0.93683	0.93193	0.92201		1586.25	0.93274	0.92726	0.91798		1586.25	0.32052	0.31405	0.33924		1586.25	0.494145	0.503001	0.469493														1737.5	0.94376
1586	0.93632	0.93236	0.92171		1586	0.93253	0.92802	0.91798		1586	0.31934	0.31485	0.33923		1586	0.495747	0.501896	0.469506														1737.25	0.94589
1585.75	0.93595	0.93281	0.9202		1585.75	0.93256	0.92868	0.91687		1585.75	0.31948	0.31583	0.33407		1585.75	0.495556	0.500547	0.476163														1737	0.9475
1585.5	0.93562	0.93332	0.92016		1585.5	0.93252	0.92921	0.91712		1585.5	0.31929	0.31702	0.33523		1585.5	0.495815	0.498913	0.474657														1736.75	0.948
1585.25	0.93516	0.93373	0.92067		1585.25	0.93242	0.92966	0.91797		1585.25	0.31871	0.31833	0.3392		1585.25	0.496604	0.497122	0.469544														1736.5	0.94766
1585	0.93424	0.93393	0.91989		1585	0.93221	0.93015	0.9179		1585	0.31757	0.31962	0.33885		1585	0.498161	0.495366	0.469993														1736.25	0.94708
1584.75	0.93253	0.93412	0.91792		1584.75	0.93198	0.93073	0.91738		1584.75	0.31627	0.32123	0.33644		1584.75	0.499942	0.493184	0.473092														1736	0.94664
1584.5	0.92975	0.93453	0.91527		1584.5	0.93153	0.93144	0.91702		1584.5	0.31381	0.32339	0.3348		1584.5	0.503333	0.490273	0.475215														1735.75	0.94638
1584.25	0.92528	0.93509	0.91175		1584.25	0.92981	0.93234	0.91621		1584.25	0.30447	0.32552	0.33108		1584.25	0.516455	0.487422	0.480067														1735.5	0.94517
1584	0.91956	0.93559	0.90767		1584	0.92658	0.93357	0.9146		1584	0.28761	0.3272	0.32377		1584	0.541196	0.485187	0.489763														1735.25	0.94168
1583.75	0.91483	0.93621	0.90365		1583.75	0.92377	0.9376	0.91248		1583.75	0.2737	0.32842	0.31444		1583.75	0.562725	0.48357	0.502462														1735	0.93772
1583.5	0.91302	0.93706	0.90037		1583.5	0.92335	0.94027	0.91056		1583.5	0.27167	0.32962	0.30618		1583.5	0.565958	0.481986	0.514023														1734.75	0.93747
1583.25	0.91549	0.93789	0.90133		1583.25	0.92681	0.943	0.91247		1583.25	0.28879	0.33207	0.3144		1583.25	0.539418	0.47877	0.502517														1734.5	0.94117
1583	0.92314	0.93838	0.91157		1583	0.93547	0.94554	0.91506		1583	0.3362	0.33589	0.32587		1583	0.473402	0.473803	0.486956														1734.25	0.94314
1582.75	0.93049	0.93851	0.92298		1582.75	0.9445	0.94769	0.91708		1582.75	0.39333	0.33937	0.33505		1582.75	0.405243	0.469327	0.47489														1734	0.93957
1582.5	0.92652	0.93845	0.91707		1582.5	0.94189	0.94907	0.91848		1582.5	0.37594	0.34079	0.34159		1582.5	0.424881	0.467513	0.466495														1733.75	0.93283
1582.25	0.91928	0.93828	0.90725		1582.25	0.93361	0.94988	0.92139		1582.25	0.32541	0.33989	0.3555		1582.25	0.487569	0.468662	0.44916														1733.5	0.92687
1582	0.91772	0.93835	0.90543		1582	0.92945	0.95089	0.917		1582	0.30251	0.33769	0.33468		1582	0.51926	0.471482	0.47537														1733.25	0.92443
1581.75	0.91999	0.93936	0.90758		1581.75	0.929	0.95351	0.91646		1581.75	0.30013	0.33602	0.3322		1581.75	0.522691	0.473635	0.4786														1733	0.92742
1581.5	0.92354	0.94122	0.9103		1581.5	0.93022	0.95683	0.91689		1581.5	0.30667	0.3361	0.3342		1581.5	0.513329	0.473531	0.475994														1732.75	0.92944
1581.25	0.92664	0.9424	0.91174		1581.25	0.93149	0.95709	0.91651		1581.25	0.31356	0.33797	0.33246		1581.25	0.503679	0.471122	0.478261														1732.5	0.93126
1581	0.92909	0.94256	0.91307		1581	0.93255	0.9546	0.91647		1581	0.31946	0.34046	0.33224		1581	0.495584	0.467934	0.478548														1732.25	0.93367
1580.75	0.93133	0.94219	0.91632		1580.75	0.93373	0.95141	0.91869		1580.75	0.32614	0.34183	0.34254		1580.75	0.486596	0.46619	0.465289														1732	0.93385
1580.5	0.93287	0.9417	0.91932		1580.5	0.93445	0.94852	0.92088		1580.5	0.33028	0.3416	0.35304		1580.5	0.481118	0.466482	0.452176														1731.75	0.93267
1580.25	0.93323	0.94122	0.9189		1580.25	0.93408	0.94615	0.91974		1580.25	0.32813	0.3411	0.34755		1580.25	0.483954	0.467118	0.458983														1731.5	0.93502
1580	0.93327	0.94066	0.9173		1580	0.93336	0.94417	0.91739		1580	0.32403	0.34079	0.33651		1580	0.489415	0.467513	0.473002														1731.25	0.93974
1579.75	0.93422	0.93986	0.9185		1579.75	0.93347	0.94229	0.91776		1579.75	0.32462	0.34049	0.33821		1579.75	0.488625	0.467896	0.470814														1731	0.94147
1579.5	0.93625	0.93895	0.92153		1579.5	0.9348	0.94054	0.9201		1579.5	0.3323	0.34137	0.34928		1579.5	0.47847	0.466775	0.456826														1730.75	0.93964
1579.25	0.93868	0.93816	0.92339		1579.25	0.93694	0.93901	0.92168		1579.25	0.34493	0.34462	0.3569		1579.25	0.462269	0.46266	0.447453														1730.5	0.9373
1579	0.93992	0.9376	0.92307		1579	0.93824	0.93769	0.92142		1579	0.35284	0.34858	0.35563		1579	0.452422	0.457698	0.449002														1730.25	0.93604
1578.75	0.93892	0.93724	0.92111		1578.75	0.93746	0.93649	0.91968		1578.75	0.34809	0.35066	0.34727		1578.75	0.458308	0.455114	0.459333														1730	0.93618
1578.5	0.93742	0.93695	0.91989		1578.5	0.93609	0.93551	0.91859		1578.5	0.33984	0.35053	0.34208		1578.5	0.468726	0.455275	0.465872														1729.75	0.93824
1578.25	0.93723	0.93659	0.9211		1578.25	0.93587	0.93485	0.91977		1578.25	0.33853	0.34935	0.34767		1578.25	0.470403	0.456739	0.458833														1729.5	0.94097
1578	0.93725	0.9363	0.92214		1578	0.93604	0.93462	0.92094		1578	0.33954	0.34833	0.35333		1578	0.469109	0.458009	0.451819														1729.25	0.94253
1577.75	0.93592	0.93627	0.92028		1577.75	0.93534	0.93482	0.91971		1577.75	0.33546	0.34848	0.34741		1577.75	0.474359	0.457822	0.459158														1729	0.94382
1577.5	0.933	0.93654	0.917		1577.5	0.93353	0.93521	0.91752		1577.5	0.32497	0.34993	0.33709		1577.5	0.488157	0.456019	0.472254														1728.75	0.94502
1577.25	0.92886	0.93699	0.91434		1577.25	0.93083	0.93563	0.91629		1577.25	0.30998	0.352	0.33143		1577.25	0.508666	0.453457	0.479608														1728.5	0.9458
1577	0.92539	0.93744	0.91267		1577	0.92904	0.93623	0.91627		1577	0.30034	0.35384	0.33134		1577	0.522387	0.451193	0.479726														1728.25	0.9464
1576.75	0.92524	0.93772	0.91207		1576.75	0.93084	0.93714	0.91759		1576.75	0.30999	0.35496	0.33742		1576.75	0.508652	0.449821	0.471829														1728	0.94708
1576.5	0.92777	0.93782	0.9119		1576.5	0.93602	0.93835	0.92		1576.5	0.33942	0.3563	0.34878		1576.5	0.469263	0.448184	0.457448														1727.75	0.9479
1576.25	0.92879	0.93778	0.91086		1576.25	0.94059	0.93977	0.92243		1576.25	0.36753	0.35838	0.36059		1576.25	0.434707	0.445656	0.442986														1727.5	0.94869
1576	0.92709	0.93757	0.91001		1576	0.94203	0.94127	0.92467		1576	0.37683	0.35996	0.37184		1576	0.423855	0.443746	0.429644														1727.25	0.94875
1575.75	0.92529	0.93721	0.9109		1575.75	0.94074	0.94288	0.9261		1575.75	0.36849	0.36039	0.37918		1575.75	0.433574	0.443227	0.421155														1727	0.94778
1575.5	0.92758	0.93704	0.91229		1575.5	0.94037	0.94536	0.92487		1575.5	0.36615	0.36054	0.37283		1575.5	0.436341	0.443047	0.428489														1726.75	0.94695
1575.25	0.93079	0.9376	0.91333		1575.25	0.93973	0.9495	0.92211		1575.25	0.36209	0.36132	0.359		1575.25	0.441183	0.442108	0.444906														1726.5	0.94726
1575	0.93155	0.93902	0.91489		1575	0.93712	0.95416	0.92036		1575	0.34599	0.36248	0.35051		1575	0.460936	0.440716	0.4553														1726.25	0.94807
1574.75	0.93151	0.94074	0.91649		1574.75	0.93465	0.95645	0.91957		1574.75	0.33138	0.36375	0.34674		1574.75	0.479674	0.439197	0.459996														1726	0.94846
1574.5	0.93298	0.9419	0.91706		1574.5	0.93461	0.95488	0.91866		1574.5	0.33115	0.36477	0.34241		1574.5	0.479975	0.437981	0.465454														1725.75	0.9482
1574.25	0.93568	0.94217	0.91739		1574.25	0.9364	0.95122	0.9181		1574.25	0.34171	0.36509	0.33979		1574.25	0.466342	0.4376	0.468789														1725.5	0.94759
1574	0.93798	0.9417	0.91899		1574	0.93805	0.94733	0.91906		1574	0.35164	0.36448	0.34431		1574	0.453902	0.438326	0.46305														1725.25	0.94739
1573.75	0.9391	0.94094	0.92122		1573.75	0.93869	0.9441	0.92083		1573.75	0.35564	0.36372	0.35279		1573.75	0.448989	0.439233	0.452484														1725	0.94801
1573.5	0.93903	0.94029	0.92236		1573.5	0.93845	0.94193	0.9218		1573.5	0.35415	0.36429	0.35751		1573.5	0.450813	0.438553	0.446712														1724.75	0.94901
1573.25	0.93843	0.93972	0.92224		1573.25	0.93799	0.94045	0.9218		1573.25	0.35128	0.36622	0.3575		1573.25	0.454347	0.436258	0.446724														1724.5	0.94946
1573	0.93815	0.93909	0.92159		1573	0.93802	0.93916	0.92146		1573	0.35146	0.36865	0.35586		1573	0.454124	0.433386	0.448721														1724.25	0.94833
1572.75	0.93773	0.93841	0.92063		1572.75	0.93817	0.93801	0.92106		1572.75	0.35238	0.37121	0.35392		1572.75	0.452989	0.43038	0.451095														1724	0.94612
1572.5	0.9364	0.93783	0.91943		1572.5	0.93772	0.93726	0.92072		1572.5	0.34966	0.3741	0.35226		1572.5	0.456354	0.427012	0.453137														1723.75	0.94453
1572.25	0.93471	0.93749	0.9182		1572.25	0.93708	0.93705	0.92052		1572.25	0.34575	0.37647	0.35131		1572.25	0.461238	0.42427	0.454309														1723.5	0.94416
1572	0.93335	0.93746	0.91689		1572	0.93673	0.93732	0.92021		1572	0.34367	0.37761	0.34979		1572	0.463858	0.422957	0.456193														1723.25	0.94425
1571.75	0.9325	0.93759	0.91568		1571.75	0.93685	0.93803	0.91995		1571.75	0.34437	0.37867	0.34854		1571.75	0.462975	0.421739	0.457747														1723	0.94368
1571.5	0.9328	0.93763	0.91569		1571.5	0.93794	0.93895	0.92073		1571.5	0.35098	0.38108	0.35232		1571.5	0.454718	0.418984	0.453063														1722.75	0.94205
1571.25	0.93459	0.93735	0.91684		1571.25	0.93995	0.93972	0.9221		1571.25	0.3635	0.3843	0.35897		1571.25	0.439496	0.41533	0.444942														1722.5	0.94087
1571	0.93676	0.93667	0.91782		1571	0.94159	0.94006	0.92255		1571	0.374	0.38729	0.3612		1571	0.427128	0.411964	0.442252														1722.25	0.94167
1570.75	0.93765	0.93614	0.91799		1570.75	0.94149	0.94051	0.92175		1570.75	0.37338	0.39092	0.35726		1570.75	0.427849	0.407912	0.447016														1722	0.94323
1570.5	0.93719	0.93662	0.91755		1570.5	0.93992	0.94178	0.92022		1570.5	0.36328	0.39605	0.34984		1570.5	0.439759	0.40225	0.456131														1721.75	0.94342
1570.25	0.93759	0.93794	0.91764		1570.25	0.93948	0.94333	0.91949		1570.25	0.36052	0.40104	0.34635		1570.25	0.443071	0.396812	0.460485														1721.5	0.94235
1570	0.93948	0.9392	0.91862		1570	0.94095	0.94404	0.92006		1570	0.36989	0.40407	0.34908		1570	0.431927	0.393543	0.457075														1721.25	0.94127
1569.75	0.93997	0.93965	0.91898		1569.75	0.94124	0.9435	0.92022		1569.75	0.37173	0.40486	0.34984		1569.75	0.429772	0.392695	0.456131														1721	0.94069
1569.5	0.93801	0.93927	0.91811		1569.5	0.93918	0.942	0.91926		1569.5	0.35866	0.40447	0.34526		1569.5	0.445317	0.393114	0.461854														1720.75	0.94059
1569.25	0.93639	0.93863	0.91742		1569.25	0.93772	0.94052	0.91873		1569.25	0.34967	0.40346	0.34273		1569.25	0.456342	0.3942	0.465048														1720.5	0.94097
1569	0.93648	0.93819	0.91748		1569	0.93835	0.93967	0.9193		1569	0.35349	0.40385	0.34545		1569	0.451623	0.39378	0.461615														1720.25	0.94146
1568.75	0.93649	0.93805	0.91716		1568.75	0.93914	0.93932	0.91977		1568.75	0.35843	0.41014	0.34768		1568.75	0.445596	0.387068	0.45882														1720	0.94095
1568.5	0.93486	0.93812	0.91569		1568.5	0.93862	0.93929	0.91937		1568.5	0.35516	0.42182	0.3458		1568.5	0.449576	0.374873	0.461175														1719.75	0.93893
1568.25	0.93139	0.93814	0.91316		1568.25	0.9367	0.93947	0.91836		1568.25	0.34348	0.42945	0.34103		1568.25	0.464099	0.367087	0.467207														1719.5	0.9366
1568	0.92699	0.93811	0.91019		1568	0.93428	0.93997	0.91735		1568	0.32927	0.43046	0.33628		1568	0.482448	0.366067	0.473299														1719.25	0.93506
1567.75	0.92345	0.93832	0.90764		1567.75	0.93295	0.94098	0.91697		1567.75	0.3217	0.42809	0.33457		1567.75	0.492549	0.368465	0.475513														1719	0.93424
1567.5	0.92269	0.93881	0.90661		1567.5	0.93426	0.94259	0.91797		1567.5	0.32914	0.4249	0.3392		1567.5	0.482619	0.371713	0.469544														1718.75	0.93347
1567.25	0.927	0.93919	0.90874		1567.25	0.93969	0.94454	0.92118		1567.25	0.36184	0.42185	0.35449		1567.25	0.441483	0.374842	0.450396														1718.5	0.93166
1567	0.93574	0.93911	0.91458		1567	0.94831	0.94649	0.92687		1567	0.42012	0.41828	0.38314		1567	0.376627	0.378533	0.416643														1718.25	0.92773
1566.75	0.94034	0.93848	0.92064		1566.75	0.95277	0.94814	0.93281		1566.75	0.45354	0.41324	0.41537		1566.75	0.343384	0.383798	0.381565														1718	0.92227
1566.5	0.93031	0.93731	0.91676		1566.5	0.94533	0.94906	0.93156		1566.5	0.39902	0.40758	0.40837		1566.5	0.399005	0.389787	0.388946														1717.75	0.91767
1566.25	0.90956	0.93587	0.89422		1566.25	0.93219	0.94868	0.91647		1566.25	0.31741	0.40268	0.33225		1566.25	0.498379	0.39504	0.478535														1717.5	0.91688
1566	0.89566	0.93461	0.87306		1566	0.93047	0.94717	0.90699		1566	0.30802	0.39927	0.29137		1566	0.511421	0.398733	0.535555														1717.25	0.92243
1565.75	0.89766	0.93414	0.87912		1565.75	0.9467	0.94649	0.92715		1565.75	0.40861	0.39714	0.38462		1565.75	0.388691	0.401056	0.414968														1717	0.92953
1565.5	0.90981	0.93613	0.90933		1565.5	0.9715	0.95124	0.97098		1565.5	0.6234	0.39539	0.68935		1565.5	0.205233	0.402974	0.16156														1716.75	0.92576
1565.25	0.89739	0.94311	0.90351		1565.25	0.96304	0.98706	0.9696		1565.25	0.54043	0.39322	0.67711		1565.25	0.267261	0.405364	0.169341														1716.5	0.92081
1565	0.86196	0.95536	0.86718		1565	0.9209	1.0102	0.92647		1565	0.26013	0.39146	0.38109		1565	0.58481	0.407313	0.418972														1716.25	0.91738
1564.75	0.84678	0.9707	0.90039		1564.75	0.89417	1.0307	0.95078		1564.75	0.16075	0.39132	0.5286		1564.75	0.793849	0.407468	0.276873														1716	0.91479
1564.5	0.89317	0.9863	1.1163		1564.5	0.93135	1.0532	0.96102		1564.5	0.31277	0.39292	0.60519		1564.5	0.504775	0.405696	0.218108														1715.75	0.91261
1564.25	0.95921	0.99626	1.0035		1564.25	0.99384	1.0691	0.93723		1564.25	0.90393	0.39563	0.44092		1564.25	0.0438652	0.402711	0.35564														1715.5	0.91008
1564	0.92672	0.99888	0.90863		1564	0.95439	1.0672	0.93577		1564	0.46636	0.39835	0.43233		1564	0.331279	0.399735	0.364185														1715.25	0.90806
1563.75	0.91972	0.99027	0.90156		1563.75	0.94199	1.0457	0.92339		1563.75	0.37663	0.40004	0.36538		1563.75	0.424085	0.397897	0.437255														1715	0.9099
1563.5	0.91858	0.96921	0.90011		1563.5	0.93718	1.0106	0.91834		1563.5	0.34637	0.40064	0.34091		1563.5	0.46046	0.397246	0.46736														1714.75	0.91394
1563.25	0.91943	0.95716	0.89934		1563.25	0.93547	0.99172	0.91503		1563.25	0.3362	0.40037	0.3257		1563.25	0.473402	0.397538	0.487182														1714.5	0.91465
1563	0.92064	0.95079	0.89993		1563	0.9347	0.97919	0.91367		1563	0.33168	0.39908	0.31967		1563	0.479281	0.39894	0.495298														1714.25	0.91377
1562.75	0.92152	0.94706	0.90153		1562.75	0.93422	0.96999	0.91395		1562.75	0.32893	0.39693	0.32089		1562.75	0.482897	0.401286	0.493644														1714	0.91437
1562.5	0.92255	0.94535	0.90258		1562.5	0.93483	0.9645	0.91459		1562.5	0.33247	0.3959	0.32377		1562.5	0.478248	0.402414	0.489763														1713.75	0.91736
1562.25	0.92316	0.94493	0.90244		1562.25	0.93606	0.96142	0.91505		1562.25	0.33964	0.39927	0.3258		1562.25	0.468981	0.398733	0.487049														1713.5	0.9204
1562	0.92156	0.94521	0.90153		1562	0.93593	0.95964	0.91559		1562	0.33892	0.40801	0.32826		1562	0.469903	0.389329	0.483782														1713.25	0.92232
1561.75	0.91819	0.94569	0.90056		1561.75	0.93453	0.95872	0.91658		1561.75	0.33073	0.41878	0.33278		1561.75	0.480526	0.378014	0.477843														1713	0.92399
1561.5	0.9173	0.94602	0.90084		1561.5	0.93545	0.95861	0.91867		1561.5	0.33609	0.42616	0.34246		1561.5	0.473544	0.370427	0.46539														1712.75	0.9252
1561.25	0.92209	0.94589	0.90343		1561.25	0.94136	0.9591	0.92231		1561.25	0.37253	0.42796	0.35999		1561.25	0.428839	0.368597	0.44371														1712.5	0.92585
1561	0.92663	0.94522	0.90624		1561	0.94599	0.95996	0.92516		1561	0.40357	0.42493	0.37434		1561	0.394081	0.371683	0.426734														1712.25	0.92717
1560.75	0.92478	0.9438	0.90614		1560.75	0.94263	0.96059	0.92363		1560.75	0.38082	0.42005	0.3666		1560.75	0.41928	0.376699	0.435808														1712	0.92935
1560.5	0.92514	0.94136	0.90602		1560.5	0.94023	0.95999	0.9208		1560.5	0.36526	0.41596	0.35262		1560.5	0.437398	0.380948	0.452693														1711.75	0.93059
1560.25	0.92797	0.93845	0.90716		1560.25	0.94012	0.95806	0.91904		1560.25	0.36455	0.41237	0.3442		1560.25	0.438243	0.384713	0.463189														1711.5	0.93045
1560	0.93028	0.9373	0.90892		1560	0.93992	0.95688	0.91834		1560	0.36333	0.40842	0.34092		1560	0.439699	0.388893	0.467348														1711.25	0.93069
1559.75	0.93239	0.9396	0.9105		1559.75	0.94014	0.95774	0.91807		1559.75	0.36472	0.40424	0.33965		1559.75	0.43804	0.393361	0.468968														1711	0.93169
1559.5	0.93482	0.94302	0.91137		1559.5	0.94133	0.9584	0.91772		1559.5	0.37232	0.4007	0.33802		1559.5	0.429084	0.397181	0.471058														1710.75	0.93172
1559.25	0.93701	0.9448	0.91183		1559.25	0.94266	0.95718	0.91733		1559.25	0.381	0.39863	0.33622		1559.25	0.419075	0.39943	0.473376														1710.5	0.93027
1559	0.93836	0.94452	0.91251		1559	0.94324	0.95431	0.91725		1559	0.38484	0.39843	0.33583		1559	0.41472	0.399648	0.473881														1710.25	0.92857
1558.75	0.93915	0.94317	0.91357		1558.75	0.9433	0.95101	0.91761		1558.75	0.38525	0.39922	0.33751		1558.75	0.414257	0.398788	0.471713														1710	0.92778
1558.5	0.93979	0.94176	0.91485		1558.5	0.94339	0.94832	0.91836		1558.5	0.38586	0.39947	0.34102		1558.5	0.41357	0.398516	0.46722														1709.75	0.92835
1558.25	0.93974	0.94061	0.91563		1558.25	0.94308	0.94628	0.91889		1558.25	0.3838	0.39776	0.34349		1558.25	0.415895	0.400379	0.464086														1709.5	0.92949
1558	0.93854	0.93967	0.91529		1558	0.94206	0.94455	0.91872		1558	0.37703	0.39367	0.34271		1558	0.423624	0.404868	0.465073														1709.25	0.92991
1557.75	0.93696	0.93897	0.91398		1557.75	0.94118	0.94312	0.91809		1557.75	0.37132	0.39054	0.33977		1557.75	0.430252	0.408334	0.468815														1709	0.93004
1557.5	0.93548	0.93847	0.91192		1557.5	0.94101	0.94206	0.91732		1557.5	0.37028	0.39336	0.33615		1557.5	0.43147	0.40521	0.473467														1708.75	0.93082
1557.25	0.93329	0.93802	0.90947		1557.25	0.94067	0.94136	0.91666		1557.25	0.36805	0.40139	0.33314		1557.25	0.434093	0.396433	0.477373														1708.5	0.93113
1557	0.92936	0.93756	0.90724		1557	0.93894	0.94107	0.91659		1557	0.35714	0.40911	0.3328		1557	0.447162	0.38816	0.477817														1708.25	0.92945
1556.75	0.92527	0.93707	0.90559		1556.75	0.93698	0.94129	0.91705		1556.75	0.3452	0.41191	0.33494		1556.75	0.461929	0.385198	0.475033														1708	0.92751
1556.5	0.92538	0.93666	0.90535		1556.5	0.93831	0.94219	0.918		1556.5	0.35325	0.40953	0.33932		1556.5	0.451918	0.387714	0.469391														1707.75	0.92749
1556.25	0.93048	0.93628	0.90799		1556.25	0.94292	0.94368	0.92013		1556.25	0.38274	0.40558	0.34943		1556.25	0.417096	0.391923	0.45664														1707.5	0.92773
1556	0.93515	0.93616	0.91112		1556	0.94577	0.9458	0.92147		1556	0.40208	0.40291	0.35589		1556	0.395688	0.394792	0.448684														1707.25	0.92567
1555.75	0.93669	0.93713	0.91203		1555.75	0.94497	0.94899	0.92009		1555.75	0.39655	0.40204	0.34922		1555.75	0.401702	0.395731	0.456901														1707	0.92167
1555.5	0.93674	0.93968	0.9114		1555.5	0.94278	0.95281	0.91728		1555.5	0.38178	0.40243	0.33597		1555.5	0.418187	0.39531	0.4737														1706.75	0.91791
1555.25	0.938	0.94237	0.911		1555.25	0.94237	0.95497	0.91524		1555.25	0.3791	0.40258	0.32668		1555.25	0.421246	0.395148	0.485877														1706.5	0.91621
1555	0.94058	0.94349	0.91171		1555	0.94394	0.95421	0.91497		1555	0.38957	0.40238	0.32547		1555	0.409414	0.395364	0.487489														1706.25	0.91781
1554.75	0.94226	0.94305	0.91355		1554.75	0.94512	0.95138	0.91632		1554.75	0.39756	0.40369	0.33158		1554.75	0.400597	0.393952	0.479412														1706	0.92195
1554.5	0.94265	0.94171	0.91573		1554.5	0.94528	0.94778	0.91828		1554.5	0.39869	0.40673	0.34064		1554.5	0.399365	0.390694	0.467704														1705.75	0.92331
1554.25	0.9433	0.94006	0.91702		1554.25	0.9458	0.94444	0.91945		1554.25	0.40225	0.40906	0.34616		1554.25	0.395504	0.388213	0.460723														1705.5	0.92172
1554	0.94439	0.93858	0.91724		1554	0.9468	0.94193	0.91958		1554	0.40927	0.40853	0.3468		1554	0.38799	0.388776	0.459921														1705.25	0.91963
1553.75	0.94484	0.93765	0.91717		1553.75	0.94729	0.9405	0.91955		1553.75	0.41276	0.40466	0.34663		1553.75	0.384302	0.39291	0.460134														1705	0.91642
1553.5	0.94391	0.93723	0.91629		1553.5	0.94669	0.93984	0.91899		1553.5	0.40848	0.39753	0.34399		1553.5	0.388829	0.40063	0.463454														1704.75	0.91206
1553.25	0.94159	0.93693	0.91368		1553.25	0.94513	0.93941	0.91712		1553.25	0.39767	0.3889	0.33525		1553.25	0.400477	0.410162	0.474631														1704.5	0.90925
1553	0.93841	0.93662	0.9106		1553	0.94319	0.93901	0.91524		1553	0.38449	0.38154	0.32665		1553	0.415115	0.41846	0.485917														1704.25	0.91048
1552.75	0.93485	0.93647	0.90905		1552.75	0.9413	0.9389	0.91532		1552.75	0.37214	0.37881	0.32704		1552.75	0.429294	0.421579	0.485399														1704	0.91175
1552.5	0.93162	0.93665	0.90941		1552.5	0.94017	0.9394	0.91776		1552.5	0.36486	0.39048	0.33821		1552.5	0.437874	0.408401	0.470814														1703.75	0.91103
1552.25	0.92994	0.93715	0.91083		1552.25	0.94108	0.94067	0.92173		1552.25	0.37068	0.49401	0.35717		1552.25	0.431001	0.306264	0.447125														1703.5	0.91312
1552	0.92982	0.93776	0.91132		1552	0.94407	0.94253	0.92529		1552	0.39042	0.57679	0.37497		1552	0.408468	0.238982	0.426003														1703.25	0.91619
1551.75	0.92837	0.93815	0.90753		1551.75	0.94579	0.94463	0.92456		1551.75	0.40221	0.65621	0.37126		1551.75	0.395547	0.182957	0.430322														1703	0.91572
1551.5	0.92291	0.93811	0.90026		1551.5	0.94248	0.94671	0.91935		1551.5	0.3798	0.74846	0.34568		1551.5	0.420445	0.125831	0.461326														1702.75	0.91271
1551.25	0.91688	0.93761	0.8958		1551.25	0.93739	0.94884	0.91584		1551.25	0.34762	0.86067	0.32936		1551.25	0.458895	0.0651633	0.482329														1702.5	0.91148
1551	0.91453	0.93761	0.89463		1551	0.93549	0.95198	0.91514		1551	0.33631	0.98412	0.3262		1551	0.47326	0.00695194	0.486516														1702.25	0.91223
1550.75	0.91567	0.93966	0.89464		1550.75	0.93728	0.95729	0.91575		1550.75	0.34699	0.70931	0.32898		1550.75	0.459683	0.149164	0.482831														1702	0.91223
1550.5	0.91726	0.94331	0.89417		1550.5	0.94006	0.96331	0.91639		1550.5	0.36419	0.61802	0.33189		1550.5	0.438672	0.208997	0.479006														1701.75	0.91045
1550.25	0.91573	0.94633	0.89181		1550.25	0.94024	0.96749	0.91567		1550.25	0.36531	0.53589	0.32863		1550.25	0.437338	0.270924	0.483293														1701.5	0.90702
1550	0.91074	0.94776	0.88784		1550	0.93682	0.96949	0.91327		1550	0.34422	0.48722	0.31788		1550	0.463164	0.312275	0.497737														1701.25	0.90352
1549.75	0.90595	0.94814	0.88472		1549.75	0.93302	0.97052	0.91116		1549.75	0.3221	0.46068	0.30873		1549.75	0.492009	0.336601	0.510421														1701	0.9032
1549.5	0.90309	0.94836	0.88265		1549.5	0.93076	0.97193	0.90969		1549.5	0.30957	0.449	0.30249		1549.5	0.509241	0.347754	0.519289														1700.75	0.90634
1549.25	0.90163	0.94906	0.88092		1549.25	0.92996	0.97445	0.9086		1549.25	0.30526	0.44618	0.29795		1549.25	0.51533	0.35049	0.525857														1700.5	0.90887
1549	0.90381	0.95023	0.88406		1549	0.93318	0.97744	0.9128		1549	0.32301	0.44801	0.31583		1549	0.490784	0.348712	0.500547														1700.25	0.9101
1548.75	0.91188	0.95122	0.897		1548.75	0.94284	0.97964	0.91784		1548.75	0.38218	0.45128	0.33859		1548.75	0.417732	0.345554	0.470326														1700	0.91502
1548.5	0.91639	0.95096	0.9026		1548.5	0.94866	0.98009	0.92245		1548.5	0.4226	0.45352	0.36071		1548.5	0.374071	0.343404	0.442842														1699.75	0.92919
1548.25	0.91192	0.94879	0.89581		1548.25	0.94436	0.9786	0.92768		1548.25	0.39241	0.45265	0.38738		1548.25	0.40626	0.344237	0.411863														1699.5	0.94708
1548	0.90182	0.94538	0.88687		1548	0.93352	0.97611	0.91804		1548	0.3249	0.44808	0.3395		1548	0.48825	0.348644	0.46916														1699.25	0.93302
1547.75	0.8914	0.94359	0.88008		1547.75	0.92201	0.97563	0.9103		1547.75	0.26529	0.43858	0.30508		1547.75	0.576279	0.357951	0.515586														1699	0.90742
1547.5	0.88434	0.94667	0.87581		1547.5	0.91403	0.98	0.90521		1547.5	0.23015	0.42272	0.2842		1547.5	0.637989	0.373947	0.546376														1698.75	0.89748
1547.25	0.88268	0.95258	0.87313		1547.25	0.9123	0.98646	0.90244		1547.25	0.22316	0.40447	0.27341		1547.25	0.651384	0.393114	0.563186														1698.5	0.89681
1547	0.89043	0.95692	0.87097		1547	0.92235	0.99054	0.90218		1547	0.26688	0.39748	0.27244		1547	0.573684	0.400685	0.564729														1698.25	0.89832
1546.75	0.89279	0.95851	0.86624		1546.75	0.92989	0.99142	0.90223		1546.75	0.30487	0.41159	0.27262		1546.75	0.515885	0.385535	0.564442														1698	0.89952
1546.5	0.86747	0.95801	0.85156		1546.5	0.91102	0.99016	0.8943		1546.5	0.21807	0.43348	0.24385		1546.5	0.661404	0.363031	0.612877														1697.75	0.90035
1546.25	0.81627	0.95597	0.82549		1546.25	0.86401	0.98806	0.87377		1546.25	0.091749	0.44531	0.18184		1546.25	1.0374	0.351338	0.740311														1697.5	0.90055
1546	0.82724	0.95354	0.82988		1546	0.87667	0.98771	0.87947		1546	0.11638	0.44339	0.19743		1546	0.934122	0.353214	0.704587														1697.25	0.89923
1545.75	0.89265	0.95161	0.8591		1545.75	0.93948	0.99115	0.90417		1545.75	0.36055	0.43444	0.28012		1545.75	0.443035	0.36207	0.552656														1697	0.89649
1545.5	0.91776	0.94945	0.86725		1545.5	0.95702	0.99711	0.90434		1545.5	0.48774	0.4253	0.2808		1545.5	0.311812	0.371305	0.551603														1696.75	0.893
1545.25	0.90743	0.94732	0.88223		1545.25	0.93797	1.0027	0.91193		1545.25	0.3512	0.41793	0.31204		1545.25	0.454445	0.378896	0.50579														1696.5	0.88938
1545	0.92142	0.94716	0.89579		1545	0.9457	1.0038	0.9194		1545	0.40161	0.41203	0.34591		1545	0.396195	0.385071	0.461037														1696.25	0.88734
1544.75	0.92592	0.94947	0.89944		1544.75	0.94536	0.99928	0.91832		1544.75	0.39925	0.40771	0.34085		1544.75	0.398755	0.389649	0.467437														1696	0.88779
1544.5	0.92665	0.9508	0.9015		1544.5	0.9422	0.99147	0.91662		1544.5	0.37795	0.40459	0.33296		1544.5	0.422566	0.392985	0.477608														1695.75	0.8896
1544.25	0.92789	0.94996	0.90344		1544.25	0.94027	0.98193	0.9155		1544.25	0.36553	0.40184	0.32784		1544.25	0.437077	0.395947	0.484338														1695.5	0.8935
1544	0.93037	0.94899	0.9055		1544	0.94018	0.974	0.91505		1544	0.36494	0.39903	0.32582		1544	0.437779	0.398994	0.487022														1695.25	0.90289
1543.75	0.93283	0.94831	0.9075		1543.75	0.94072	0.96822	0.91518		1543.75	0.36839	0.39609	0.32638		1543.75	0.433692	0.402206	0.486276														1695	0.90868
1543.5	0.93461	0.94767	0.90928		1543.5	0.94133	0.96357	0.91581		1543.5	0.37229	0.3936	0.32926		1543.5	0.429119	0.404945	0.482461														1694.75	0.90529
1543.25	0.93702	0.94714	0.91098		1543.25	0.94333	0.95978	0.91711		1543.25	0.38547	0.39134	0.33521		1543.25	0.414009	0.407446	0.474683														1694.5	0.9015
1543	0.93974	0.94656	0.91223		1543	0.94631	0.95654	0.9186		1543	0.40581	0.39064	0.34213		1543	0.391677	0.408223	0.465809														1694.25	0.89956
1542.75	0.93926	0.94572	0.91202		1542.75	0.94642	0.95372	0.91897		1542.75	0.40664	0.39645	0.3439		1542.75	0.39079	0.401812	0.463568														1694	0.89984
1542.5	0.93471	0.94458	0.91005		1542.5	0.94259	0.95137	0.91772		1542.5	0.38053	0.41211	0.33803		1542.5	0.419611	0.384987	0.471045														1693.75	0.90203
1542.25	0.93197	0.94345	0.90776		1542.25	0.94064	0.9498	0.91621		1542.25	0.3679	0.42924	0.33105		1542.25	0.43427	0.3673	0.480106														1693.5	0.90413
1542	0.93435	0.94256	0.9068		1542	0.94389	0.94914	0.91605		1542	0.38918	0.43659	0.33033		1542	0.409849	0.359926	0.481052														1693.25	0.90486
1541.75	0.93517	0.94192	0.90673		1541.75	0.94553	0.9491	0.91677		1541.75	0.40037	0.43369	0.33365		1541.75	0.397538	0.362821	0.476709														1693	0.90551
1541.5	0.9317	0.94159	0.90644		1541.5	0.94287	0.94952	0.9173		1541.5	0.38239	0.42497	0.33606		1541.5	0.417493	0.371642	0.473583														1692.75	0.90698
1541.25	0.92759	0.94174	0.90485		1541.25	0.93973	0.95051	0.91668		1541.25	0.3621	0.41449	0.33324		1541.25	0.441171	0.382486	0.477243														1692.5	0.90764
1541	0.92512	0.94233	0.90222		1541	0.93855	0.95194	0.91532		1541	0.35476	0.40526	0.32703		1541	0.450065	0.392266	0.485412														1692.25	0.9067
1540.75	0.92471	0.94297	0.90234		1540.75	0.9397	0.95341	0.91696		1540.75	0.36189	0.39961	0.33451		1540.75	0.441423	0.398364	0.475591														1692	0.9064
1540.5	0.92642	0.94331	0.90687		1540.5	0.94338	0.95461	0.91671		1540.5	0.38578	0.39707	0.33336		1540.5	0.41366	0.401133	0.477087														1691.75	0.90798
1540.25	0.92795	0.94315	0.90702		1540.25	0.94764	0.95549	0.9191		1540.25	0.41528	0.39523	0.34451		1540.25	0.381659	0.40315	0.462798														1691.5	0.90931
1540	0.92795	0.94247	0.89928		1540	0.94927	0.95616	0.91995		1540	0.42711	0.39337	0.34853		1540	0.36946	0.405199	0.45776														1691.25	0.90895
1539.75	0.92922	0.94144	0.89961		1539.75	0.94878	0.9567	0.91855		1539.75	0.42348	0.39251	0.34189		1539.75	0.373167	0.406149	0.466114														1691	0.90787
1539.5	0.93107	0.9408	0.90418		1539.5	0.94775	0.95802	0.92038		1539.5	0.41602	0.39354	0.35062		1539.5	0.380886	0.405011	0.455163														1690.75	0.90693
1539.25	0.93205	0.94211	0.90505		1539.25	0.94699	0.96357	0.91956		1539.25	0.41065	0.39655	0.3467		1539.25	0.386528	0.401702	0.460046														1690.5	0.9056
1539	0.93174	0.9457	0.90408		1539	0.94611	0.96744	0.91803		1539	0.40447	0.40025	0.33946		1539	0.393114	0.397669	0.469211														1690.25	0.90369
1538.75	0.92992	0.94869	0.90283		1538.75	0.94428	0.96866	0.91678		1538.75	0.39186	0.40267	0.33369		1538.75	0.406869	0.395051	0.476657														1690	0.9023
1538.5	0.92805	0.94987	0.90226		1538.5	0.94192	0.96689	0.91574		1538.5	0.37614	0.40237	0.32894		1538.5	0.42465	0.395374	0.482883														1689.75	0.90227
1538.25	0.92993	0.95012	0.90399		1538.25	0.94194	0.96535	0.91566		1538.25	0.37628	0.39935	0.32859		1538.25	0.424489	0.398646	0.483346														1689.5	0.90248
1538	0.93496	0.94961	0.90781		1538	0.94428	0.96425	0.91686		1538	0.39184	0.39933	0.33407		1538	0.406891	0.398668	0.476163														1689.25	0.90165
1537.75	0.9406	0.94825	0.91236		1537.75	0.94739	0.9629	0.91895		1537.75	0.41349	0.41195	0.34379		1537.75	0.383535	0.385155	0.463707														1689	0.89958
1537.5	0.94418	0.94652	0.91499		1537.5	0.94911	0.96067	0.91976		1537.5	0.4259	0.43537	0.34764		1537.5	0.370692	0.361142	0.45887														1688.75	0.89675
1537.25	0.94436	0.94523	0.9145		1537.25	0.9481	0.95744	0.91812		1537.25	0.41857	0.45565	0.3399		1537.25	0.378232	0.341369	0.468649														1688.5	0.89371
1537	0.94364	0.94453	0.91409		1537	0.94667	0.95395	0.91703		1537	0.40836	0.46559	0.33481		1537	0.388957	0.331996	0.475202														1688.25	0.89156
1536.75	0.94393	0.94408	0.91567		1536.75	0.94658	0.9509	0.91825		1536.75	0.40776	0.46827	0.34049		1536.75	0.389595	0.329504	0.467896														1688	0.89208
1536.5	0.94422	0.94365	0.91653		1536.5	0.94703	0.94857	0.91926		1536.5	0.41089	0.4698	0.34527		1536.5	0.386274	0.328087	0.461841														1687.75	0.89392
1536.25	0.94346	0.94314	0.91482		1536.25	0.94699	0.94687	0.91824		1536.25	0.41061	0.47473	0.34046		1536.25	0.38657	0.323553	0.467934														1687.5	0.89396
1536	0.94189	0.94268	0.91269		1536	0.94644	0.9457	0.9171		1536	0.40676	0.48315	0.33514		1536	0.390662	0.315918	0.474774														1687.25	0.89333
1535.75	0.93978	0.94234	0.91162		1535.75	0.94547	0.94499	0.91714		1535.75	0.39998	0.49035	0.33533		1535.75	0.397962	0.309494	0.474528														1687	0.89367
1535.5	0.93858	0.94218	0.91136		1535.5	0.94543	0.94499	0.91801		1535.5	0.39969	0.48844	0.3394		1535.5	0.398277	0.311189	0.469288														1686.75	0.89438
1535.25	0.9392	0.94207	0.91118		1535.25	0.94731	0.94559	0.91904		1535.25	0.41287	0.47285	0.34424		1535.25	0.384187	0.325277	0.463139														1686.5	0.89434
1535	0.93777	0.94166	0.91014		1535	0.94749	0.9462	0.91958		1535	0.4142	0.44918	0.34676		1535	0.38279	0.34758	0.459971														1686.25	0.89256
1534.75	0.93387	0.94086	0.90831		1534.75	0.94553	0.94656	0.91964		1534.75	0.40037	0.43725	0.34708		1534.75	0.397538	0.35927	0.45957														1686	0.88888
1534.5	0.9311	0.94038	0.90622		1534.5	0.94462	0.94725	0.91937		1534.5	0.39415	0.45797	0.3458		1534.5	0.404338	0.339163	0.461175														1685.75	0.88509
1534.25	0.93024	0.94096	0.90352		1534.25	0.94511	0.94908	0.91797		1534.25	0.39751	0.50045	0.33917		1534.25	0.400652	0.300639	0.469583														1685.5	0.88307
1534	0.93003	0.94251	0.90105		1534	0.94519	0.95229	0.91573		1534	0.39803	0.53393	0.3289		1534	0.400084	0.272516	0.482936														1685.25	0.88264
1533.75	0.93028	0.94436	0.90163		1533.75	0.94484	0.95615	0.91574		1533.75	0.39565	0.54676	0.32894		1533.75	0.402689	0.262203	0.482883														1685	0.88295
1533.5	0.93158	0.94583	0.90429		1533.5	0.94573	0.95956	0.91803		1533.5	0.40181	0.54269	0.33948		1533.5	0.395979	0.265448	0.469186														1684.75	0.88358
1533.25	0.93188	0.94677	0.9059		1533.25	0.94622	0.96191	0.91984		1533.25	0.4052	0.52644	0.34802		1533.25	0.392331	0.278651	0.458396														1684.5	0.88418
1533	0.92906	0.9475	0.90437		1533	0.94397	0.96294	0.91888		1533	0.38977	0.50769	0.34348		1533	0.409192	0.294401	0.464099														1684.25	0.8876
1532.75	0.92448	0.94833	0.90073		1532.75	0.94034	0.96317	0.91618		1532.75	0.36594	0.49327	0.33094		1532.75	0.43659	0.306915	0.480251														1684	0.89388
1532.5	0.92258	0.94928	0.89851		1532.5	0.93986	0.9637	0.91534		1532.5	0.36293	0.47755	0.3271		1532.5	0.440177	0.320981	0.485319														1683.75	0.88328
1532.25	0.9239	0.95022	0.89843		1532.25	0.94314	0.96485	0.91713		1532.25	0.38415	0.46247	0.3353		1532.25	0.415499	0.334916	0.474566														1683.5	0.85537
1532	0.92251	0.95101	0.89699		1532	0.94356	0.96627	0.91746		1532	0.38702	0.46137	0.33682		1532	0.412267	0.335951	0.472602														1683.25	0.84901
1531.75	0.92147	0.95136	0.89702		1531.75	0.94234	0.96768	0.91733		1531.75	0.37887	0.47768	0.33622		1531.75	0.42151	0.320863	0.473376														1683	0.88463
1531.5	0.92658	0.9508	0.90156		1531.5	0.94505	0.96861	0.91954		1531.5	0.39711	0.48732	0.3466		1531.5	0.401089	0.312186	0.460171														1682.75	0.88692
1531.25	0.93089	0.94957	0.90477		1531.25	0.94677	0.96933	0.92021		1531.25	0.40906	0.4812	0.34977		1531.25	0.388213	0.317674	0.456217														1682.5	0.87544
1531	0.93163	0.94898	0.90491		1531	0.94605	0.97063	0.91891		1531	0.404	0.47424	0.34362		1531	0.393619	0.324002	0.463922														1682.25	0.87491
1530.75	0.93003	0.94976	0.90304		1530.75	0.94425	0.97127	0.91685		1530.75	0.39163	0.46943	0.33401		1530.75	0.407124	0.328429	0.476241														1682	0.87909
1530.5	0.92719	0.95114	0.9002		1530.5	0.94215	0.9701	0.91473		1530.5	0.37765	0.46491	0.32437		1530.5	0.422911	0.332631	0.488959														1681.75	0.88323
1530.25	0.92369	0.95213	0.89761		1530.25	0.93974	0.96837	0.91321		1530.25	0.36217	0.46122	0.31763		1530.25	0.441088	0.336092	0.498078														1681.5	0.88446
1530	0.92029	0.95259	0.89623		1530	0.93734	0.96733	0.91283		1530	0.34732	0.45724	0.31595		1530	0.45927	0.339856	0.500382														1681.25	0.88194
1529.75	0.91898	0.95308	0.89512		1529.75	0.93695	0.96765	0.91263		1529.75	0.34498	0.45148	0.31508		1529.75	0.462206	0.345361	0.501579														1681	0.87847
1529.5	0.92134	0.95394	0.89252		1529.5	0.94056	0.96933	0.91113		1529.5	0.36735	0.44381	0.30862		1529.5	0.43492	0.352803	0.510576														1680.75	0.87692
1529.25	0.9228	0.95459	0.88955		1529.25	0.94396	0.97118	0.90995		1529.25	0.38969	0.43627	0.30362		1529.25	0.409281	0.360245	0.51767														1680.5	0.8765
1529	0.91769	0.95452	0.88942		1529	0.94152	0.97219	0.91251		1529	0.37352	0.43045	0.31455		1529	0.427686	0.366077	0.50231														1680.25	0.87507
1528.75	0.91125	0.95388	0.88867		1528.75	0.93802	0.97253	0.91478		1528.75	0.3515	0.42634	0.32461		1528.75	0.454075	0.370244	0.488638														1680	0.87307
1528.5	0.90518	0.95331	0.88528		1528.5	0.93488	0.97319	0.91432		1528.5	0.33276	0.42419	0.32255		1528.5	0.477869	0.37244	0.491403														1679.75	0.8727
1528.25	0.90327	0.95399	0.8839		1528.25	0.93546	0.97588	0.9154		1528.25	0.33613	0.42516	0.32738		1528.25	0.473493	0.371448	0.484948														1679.5	0.87488
1528	0.91048	0.95631	0.88952		1528	0.94507	0.98114	0.92331		1528	0.39723	0.42895	0.36496		1528	0.400958	0.367593	0.437755														1679.25	0.87833
1527.75	0.90794	0.95826	0.88546		1527.75	0.94589	0.98642	0.92246		1527.75	0.40287	0.43312	0.36077		1527.75	0.394835	0.363392	0.44277														1679	0.88142
1527.5	0.89317	0.95844	0.87241		1527.5	0.93553	0.98989	0.91379		1527.5	0.33656	0.43535	0.3202		1527.5	0.472938	0.361161	0.494579														1678.75	0.88345
1527.25	0.88522	0.95799	0.87016		1527.25	0.93048	0.99213	0.91466		1527.25	0.30807	0.43434	0.32406		1527.25	0.511351	0.36217	0.489375														1678.5	0.88407
1527	0.89378	0.95866	0.88321		1527	0.93636	0.99507	0.92528		1527	0.34149	0.42988	0.37495		1527	0.466622	0.366653	0.426027														1678.25	0.88356
1526.75	0.90738	0.96156	0.88743		1526.75	0.94144	1.0017	0.92075		1526.75	0.37301	0.42324	0.35239		1526.75	0.42828	0.373413	0.452976														1678	0.88307
1526.5	0.9154	0.96534	0.8884		1526.5	0.94045	1.0111	0.91271		1526.5	0.36669	0.41919	0.31544		1526.5	0.435701	0.377589	0.501083														1677.75	0.88322
1526.25	0.92469	0.96631	0.89571		1526.25	0.94321	1.0157	0.91365		1526.25	0.38464	0.42757	0.31958		1526.25	0.414946	0.368993	0.49542														1677.5	0.88355
1526	0.93245	0.96454	0.90259		1526	0.94673	1.0105	0.9164		1526	0.40876	0.45137	0.33194		1526	0.388532	0.345467	0.47894														1677.25	0.88349
1525.75	0.9356	0.96311	0.90429		1525.75	0.94732	0.99927	0.91562		1525.75	0.41301	0.47215	0.3284		1525.75	0.384039	0.32592	0.483597														1677	0.88291
1525.5	0.93536	0.96164	0.9031		1525.5	0.94589	0.98796	0.91326		1525.5	0.40288	0.48058	0.31783		1525.5	0.394824	0.318234	0.497805														1676.75	0.88176
1525.25	0.93385	0.95936	0.90218		1525.25	0.94427	0.97858	0.91224		1525.25	0.39177	0.48235	0.31341		1525.25	0.406969	0.316638	0.503887														1676.5	0.88007
1525	0.93175	0.95701	0.90142		1525	0.94295	0.97166	0.91225		1525	0.38289	0.47867	0.31344		1525	0.416926	0.319964	0.503846														1676.25	0.87825
1524.75	0.92893	0.9552	0.89967		1524.75	0.94169	0.96717	0.91203		1524.75	0.37462	0.46899	0.31246		1524.75	0.426409	0.328836	0.505206														1676	0.87684
1524.5	0.92675	0.95409	0.89744		1524.5	0.94164	0.96482	0.91187		1524.5	0.37431	0.45697	0.31177		1524.5	0.426769	0.340112	0.506166														1675.75	0.87616
1524.25	0.92871	0.95363	0.8973		1524.25	0.94607	0.96427	0.91407		1524.25	0.40414	0.44818	0.32144		1524.25	0.393468	0.348548	0.4929														1675.5	0.87617
1524	0.93096	0.95331	0.8995		1524	0.95114	0.96477	0.919		1524	0.44102	0.44345	0.34401		1524	0.355542	0.353155	0.463429														1675.25	0.87783
1523.75	0.92505	0.95254	0.90085		1523.75	0.94864	0.96562	0.92383		1523.75	0.42249	0.44047	0.36758		1523.75	0.374184	0.356084	0.434648														1675	0.88297
1523.5	0.91442	0.95147	0.89805		1523.5	0.94115	0.96676	0.9243		1523.5	0.37117	0.43761	0.36994		1523.5	0.430427	0.358913	0.431869														1674.75	0.88649
1523.25	0.91145	0.95099	0.89006		1523.25	0.93963	0.96877	0.91758		1523.25	0.36148	0.43427	0.33737		1523.25	0.441916	0.36224	0.471894														1674.5	0.88085
1523	0.91771	0.95178	0.88635		1523	0.94454	0.97241	0.91227		1523	0.39359	0.43125	0.31351		1523	0.404956	0.365271	0.503749														1674.25	0.87358
1522.75	0.92174	0.95394	0.88912		1522.75	0.94568	0.97827	0.91221		1522.75	0.40148	0.42905	0.31326		1522.75	0.396336	0.367492	0.504095														1674	0.87002
1522.5	0.9226	0.95644	0.89205		1522.5	0.9441	0.98439	0.91284		1522.5	0.39063	0.42802	0.31603		1522.5	0.408234	0.368536	0.500272														1673.75	0.86921
1522.25	0.92213	0.95775	0.89404		1522.25	0.94199	0.98736	0.91329		1522.25	0.37658	0.42726	0.31797		1522.25	0.424143	0.369308	0.497614														1673.5	0.86965
1522	0.9216	0.95835	0.89366		1522	0.94016	0.98637	0.91166		1522	0.36482	0.42463	0.31088		1522	0.437921	0.371989	0.507407														1673.25	0.87033
1521.75	0.92344	0.95901	0.89153		1521.75	0.9405	0.98392	0.908		1521.75	0.36698	0.41956	0.2955		1521.75	0.435358	0.377206	0.529443														1673	0.87052
1521.5	0.92966	0.95976	0.89432		1521.5	0.94445	0.98213	0.90855		1521.5	0.39299	0.41651	0.29775		1521.5	0.405619	0.380375	0.526148														1672.75	0.87059
1521.25	0.93589	0.96034	0.90073		1521.25	0.94791	0.98102	0.91229		1521.25	0.41717	0.42016	0.31362		1521.25	0.379687	0.376585	0.503596														1672.5	0.8708
1521	0.93973	0.96018	0.90502		1521	0.94912	0.97952	0.91406		1521	0.42598	0.43017	0.32139		1521	0.370611	0.36636	0.492968														1672.25	0.86978
1520.75	0.94226	0.95888	0.90705		1520.75	0.94955	0.97659	0.91406		1520.75	0.42912	0.44236	0.32138		1520.75	0.367421	0.354224	0.492981														1672	0.86695
1520.5	0.9439	0.95676	0.90764		1520.5	0.94977	0.97199	0.91328		1520.5	0.43078	0.45223	0.31796		1520.5	0.365744	0.344641	0.497628														1671.75	0.8645
1520.25	0.94414	0.95478	0.90705		1520.25	0.94941	0.96704	0.9121		1520.25	0.42809	0.45871	0.31279		1520.25	0.368465	0.338462	0.504747														1671.5	0.86419
1520	0.94255	0.95355	0.90545		1520	0.94801	0.96307	0.91069		1520	0.41789	0.46373	0.30675		1520	0.378938	0.333735	0.513215														1671.25	0.86571
1519.75	0.94001	0.95292	0.90367		1519.75	0.94639	0.96028	0.90981		1519.75	0.40641	0.46957	0.30301		1519.75	0.391036	0.3283	0.518543														1671	0.86672
1519.5	0.93799	0.9525	0.90261		1519.5	0.9459	0.95842	0.91022		1519.5	0.40295	0.47633	0.30473		1519.5	0.394749	0.322092	0.516085														1670.75	0.86666
1519.25	0.93703	0.95229	0.90262		1519.25	0.94686	0.95759	0.91209		1519.25	0.4097	0.48311	0.31276		1519.25	0.387534	0.315954	0.504789														1670.5	0.86568
1519	0.93704	0.95247	0.90341		1519	0.94854	0.95798	0.9145		1519	0.42178	0.48883	0.32337		1519	0.374914	0.310842	0.4903														1670.25	0.86322
1518.75	0.93842	0.95295	0.90413		1518.75	0.9505	0.95942	0.91577		1518.75	0.43623	0.49141	0.32906		1518.75	0.360284	0.308556	0.482725														1670	0.85993
1518.5	0.94031	0.95333	0.90399		1518.5	0.95177	0.96137	0.915		1518.5	0.44582	0.48732	0.3256		1518.5	0.35084	0.312186	0.487316														1669.75	0.85712
1518.25	0.94149	0.95334	0.90336		1518.25	0.95195	0.96334	0.9134		1518.25	0.44726	0.47838	0.31848		1518.25	0.34944	0.320227	0.496918														1669.5	0.85588
1518	0.94175	0.95296	0.90248		1518	0.95156	0.96466	0.91189		1518	0.44422	0.47417	0.31186		1518	0.352402	0.324066	0.50604														1669.25	0.85829
1517.75	0.93997	0.95278	0.90042		1517.75	0.94978	0.96505	0.90982		1517.75	0.43082	0.47979	0.30303		1517.75	0.365704	0.318949	0.518514														1669	0.86262
1517.5	0.93552	0.95339	0.89681		1517.5	0.94609	0.96501	0.90694		1517.5	0.40427	0.48979	0.29115		1517.5	0.393328	0.30999	0.535883														1668.75	0.86014
1517.25	0.93034	0.95459	0.89331		1517.25	0.94224	0.96521	0.90474		1517.25	0.37823	0.49712	0.28235		1517.25	0.422244	0.303539	0.549212														1668.5	0.85229
1517	0.9263	0.95599	0.89143		1517	0.93994	0.96595	0.90455		1517	0.3634	0.50051	0.2816		1517	0.439615	0.300587	0.550367														1668.25	0.84768
1516.75	0.92449	0.95733	0.89163		1516.75	0.94031	0.96731	0.90689		1516.75	0.36577	0.5042	0.29094		1516.75	0.436792	0.297397	0.536197														1668	0.84857
1516.5	0.92529	0.95842	0.89333		1516.5	0.9437	0.96925	0.9111		1516.5	0.3879	0.51074	0.3085		1516.5	0.41128	0.2918	0.510745														1667.75	0.85209
1516.25	0.92567	0.95932	0.8934		1516.25	0.94644	0.97159	0.91346		1516.25	0.40678	0.5157	0.31871		1516.25	0.39064	0.287603	0.496604														1667.5	0.85513
1516	0.92322	0.96016	0.89043		1516	0.94564	0.97429	0.91205		1516	0.40117	0.51515	0.31258		1516	0.396672	0.288066	0.505039														1667.25	0.85758
1515.75	0.92074	0.96095	0.88797		1515.75	0.94439	0.97739	0.91078		1515.75	0.3926	0.51027	0.30713		1515.75	0.40605	0.2922	0.512678														1667	0.85984
1515.5	0.91883	0.96167	0.8866		1515.5	0.94402	0.9808	0.91091		1515.5	0.3901	0.50596	0.30766		1515.5	0.408824	0.295884	0.511929														1666.75	0.8619
1515.25	0.91492	0.96237	0.88225		1515.25	0.94287	0.98397	0.90921		1515.25	0.38241	0.51116	0.30048		1515.25	0.417471	0.291443	0.522184														1666.5	0.86326
1515	0.90803	0.96308	0.87333		1515	0.94037	0.98648	0.90443		1515	0.36613	0.52914	0.28114		1515	0.436365	0.276429	0.551077														1666.25	0.86369
1514.75	0.89772	0.96376	0.86445		1514.75	0.93571	0.98853	0.90102		1514.75	0.33759	0.54475	0.26804		1514.75	0.47161	0.263803	0.5718														1666	0.86359
1514.5	0.88271	0.96465	0.85649		1514.5	0.92618	0.9911	0.89867		1514.5	0.28558	0.54621	0.25933		1514.5	0.544272	0.26264	0.586147														1665.75	0.8635
1514.25	0.87601	0.96678	0.85707		1514.25	0.92339	0.99631	0.90343		1514.25	0.27188	0.54256	0.27722		1514.25	0.565623	0.265552	0.557175														1665.5	0.86375
1514	0.89516	0.97081	0.87374		1514	0.94515	1.0103	0.9138		1514	0.39778	0.54793	0.32022		1514	0.400357	0.261275	0.494552														1665.25	0.86434
1513.75	0.92128	0.9762	0.88976		1513.75	0.97354	1.0201	0.92289		1513.75	0.64521	0.57202	0.36291		1513.75	0.190299	0.242589	0.440201														1665	0.86457
1513.5	0.9186	0.98136	0.8779		1513.5	0.97432	1.0297	0.93115		1513.5	0.65368	0.60499	0.40611		1513.5	0.184635	0.218252	0.391356														1664.75	0.86395
1513.25	0.89084	0.98383	0.85188		1513.25	0.95167	1.037	0.91005		1513.25	0.44506	0.6137	0.30402		1513.25	0.351581	0.212044	0.517098														1664.5	0.86279
1513	0.8802	0.98207	0.84715		1513	0.94684	1.0369	0.91128		1513	0.40957	0.59782	0.30927		1513	0.387672	0.22343	0.509662														1664.25	0.86143
1512.75	0.88081	0.97838	0.85495		1512.75	0.949	1.0339	0.92115		1512.75	0.42512	0.58537	0.35433		1512.75	0.371488	0.23257	0.450592														1664	0.85975
1512.5	0.88514	0.97812	0.88191		1512.5	0.94389	1.0375	0.94045		1512.5	0.38918	0.57277	0.46043		1512.5	0.409849	0.24202	0.336836														1663.75	0.85796
1512.25	0.87394	0.98304	0.87992		1512.25	0.91456	1.0502	0.92081		1512.25	0.23234	0.55368	0.35271		1512.25	0.633876	0.256741	0.452582														1663.5	0.85661
1512	0.89449	0.98991	0.8664		1512	0.92351	1.0649	0.89451		1512	0.27246	0.53469	0.24456		1512	0.564697	0.271898	0.611615														1663.25	0.85594
1511.75	0.91438	0.99321	0.87227		1511.75	0.9373	1.0701	0.89413		1511.75	0.34707	0.52042	0.24326		1511.75	0.459583	0.283646	0.613929														1663	0.85553
1511.5	0.92654	0.98718	0.87998		1511.5	0.94537	1.0527	0.89786		1511.5	0.39931	0.51188	0.25642		1511.5	0.39869	0.290832	0.591048														1662.75	0.85545
1511.25	0.93377	0.97593	0.88689		1511.25	0.94897	1.0213	0.90133		1511.25	0.42489	0.50837	0.26919		1511.25	0.371723	0.29382	0.569941														1662.5	0.85725
1511	0.93764	0.96959	0.8911		1511	0.94968	1.001	0.90254		1511	0.4301	0.506	0.27382		1511	0.366431	0.295849	0.562535														1662.25	0.85763
1510.75	0.93905	0.96711	0.89217		1510.75	0.94853	0.99135	0.90118		1510.75	0.42167	0.50019	0.26862		1510.75	0.375027	0.300865	0.570862														1662	0.85173
1510.5	0.94007	0.96545	0.89261		1510.5	0.94739	0.98507	0.89956		1510.5	0.41346	0.49221	0.26259		1510.5	0.383566	0.30785	0.580722														1661.75	0.84576
1510.25	0.94205	0.96364	0.89417		1510.25	0.94756	0.97933	0.89941		1510.25	0.41472	0.48871	0.26203		1510.25	0.382245	0.310949	0.581649														1661.5	0.84497
1510	0.94412	0.96186	0.89603		1510	0.94833	0.97421	0.90003		1510	0.42023	0.49453	0.26434		1510	0.376513	0.305807	0.577837														1661.25	0.84786
1509.75	0.94531	0.9604	0.89714		1509.75	0.94882	0.97009	0.90048		1509.75	0.4238	0.51076	0.26602		1509.75	0.372839	0.291783	0.575086														1661	0.8502
1509.5	0.94604	0.95929	0.89719		1509.5	0.9495	0.96675	0.90047		1509.5	0.42878	0.53013	0.26597		1509.5	0.367765	0.275618	0.575167														1660.75	0.85029
1509.25	0.94648	0.95853	0.89629		1509.25	0.95046	0.96414	0.90006		1509.25	0.43592	0.54057	0.26446		1509.25	0.360593	0.267148	0.57764														1660.5	0.84897
1509	0.94539	0.9581	0.89503		1509	0.95029	0.96238	0.89966		1509	0.43465	0.54544	0.26298		1509	0.36186	0.263253	0.580077														1660.25	0.84814
1508.75	0.94249	0.95792	0.89381		1508.75	0.94837	0.96148	0.89939		1508.75	0.42048	0.55085	0.26197		1508.75	0.376255	0.258967	0.581748														1660	0.84913
1508.5	0.94146	0.95788	0.89303		1508.5	0.94782	0.96138	0.89905		1508.5	0.41654	0.55696	0.26074		1508.5	0.380343	0.254176	0.583792														1659.75	0.85019
1508.25	0.94446	0.95788	0.89296		1508.25	0.95054	0.9619	0.89871		1508.25	0.43649	0.5618	0.25948		1508.25	0.360026	0.250418	0.585896														1659.5	0.84954
1508	0.94687	0.95788	0.89323		1508	0.95228	0.96284	0.89834		1508	0.44979	0.56045	0.25813		1508	0.34699	0.251463	0.588162														1659.25	0.84871
1507.75	0.94668	0.95791	0.893		1507.75	0.95165	0.96388	0.89769		1507.75	0.44489	0.54972	0.25577		1507.75	0.351747	0.259858	0.59215														1659	0.84934
1507.5	0.94507	0.95814	0.89127		1507.5	0.95018	0.96461	0.89609		1507.5	0.43381	0.53272	0.2501		1507.5	0.3627	0.273501	0.601886														1658.75	0.85048
1507.25	0.94361	0.95857	0.88909		1507.25	0.94938	0.96474	0.89454		1507.25	0.42793	0.51722	0.24466		1507.25	0.368627	0.286325	0.611437														1658.5	0.8509
1507	0.94347	0.95885	0.88933		1507	0.94997	0.96433	0.89546		1507	0.43226	0.50779	0.24787		1507	0.364255	0.294316	0.605776														1658.25	0.85073
																																1658	0.85037
																																1657.75	0.85013
																																1657.5	0.84996
																																1657.25	0.84927
																																1657	0.84774
																																1656.75	0.84596
																																1656.5	0.84449
																																1656.25	0.84325
																																1656	0.84196
																																1655.75	0.84053
																																1655.5	0.83874
																																1655.25	0.83625
																																1655	0.83377
																																1654.75	0.83289
																																1654.5	0.83339
																																1654.25	0.83212
																																1654	0.82794
																																1653.75	0.82411
																																1653.5	0.82319
																																1653.25	0.82687
																																1653	0.83288
																																1652.75	0.83039
																																1652.5	0.83333
																																1652.25	0.91761
																																1652	1.012
																																1651.75	0.84543
																																1651.5	0.82228
																																1651.25	0.82099
																																1651	0.82141
																																1650.75	0.82151
																																1650.5	0.823
																																1650.25	0.8256
																																1650	0.82752
																																1649.75	0.82807
																																1649.5	0.82792
																																1649.25	0.82731
																																1649	0.82599
																																1648.75	0.82445
																																1648.5	0.82359
																																1648.25	0.82333
																																1648	0.82242
																																1647.75	0.82097
																																1647.5	0.81999
																																1647.25	0.81843
																																1647	0.81511
																																1646.75	0.81097
																																1646.5	0.80583
																																1646.25	0.80107
																																1646	0.79985
																																1645.75	0.80424
																																1645.5	0.81175
																																1645.25	0.81643
																																1645	0.81886
																																1644.75	0.82074
																																1644.5	0.82278
																																1644.25	0.82468
																																1644	0.82606
																																1643.75	0.82699
																																1643.5	0.8278
																																1643.25	0.82898
																																1643	0.83014
																																1642.75	0.83027
																																1642.5	0.8295
																																1642.25	0.82918
																																1642	0.82996
																																1641.75	0.83107
																																1641.5	0.83189
																																1641.25	0.83232
																																1641	0.83194
																																1640.75	0.83046
																																1640.5	0.82932
																																1640.25	0.83039
																																1640	0.83226
																																1639.75	0.83213
																																1639.5	0.83122
																																1639.25	0.83146
																																1639	0.83182
																																1638.75	0.83098
																																1638.5	0.82894
																																1638.25	0.82643
																																1638	0.82485
																																1637.75	0.82514
																																1637.5	0.82633
																																1637.25	0.82642
																																1637	0.82548
																																1636.75	0.82394
																																1636.5	0.82019
																																1636.25	0.81418
																																1636	0.80903
																																1635.75	0.80879
																																1635.5	0.81582
																																1635.25	0.8298
																																1635	0.84299
																																1634.75	0.83529
																																1634.5	0.81644
																																1634.25	0.81404
																																1634	0.81928
																																1633.75	0.82413
																																1633.5	0.8261
																																1633.25	0.827
																																1633	0.8285
																																1632.75	0.83011
																																1632.5	0.83119
																																1632.25	0.8317
																																1632	0.83186
																																1631.75	0.83237
																																1631.5	0.83364
																																1631.25	0.83526
																																1631	0.8366
																																1630.75	0.83713
																																1630.5	0.83701
																																1630.25	0.83755
																																1630	0.83904
																																1629.75	0.83974
																																1629.5	0.83928
																																1629.25	0.83977
																																1629	0.84103
																																1628.75	0.84018
																																1628.5	0.83739
																																1628.25	0.83556
																																1628	0.83602
																																1627.75	0.8387
																																1627.5	0.84191
																																1627.25	0.84142
																																1627	0.83943
																																1626.75	0.83957
																																1626.5	0.84033
																																1626.25	0.83987
																																1626	0.83959
																																1625.75	0.84091
																																1625.5	0.84277
																																1625.25	0.84361
																																1625	0.84395
																																1624.75	0.84431
																																1624.5	0.8434
																																1624.25	0.84087
																																1624	0.83917
																																1623.75	0.84015
																																1623.5	0.84301
																																1623.25	0.84436
																																1623	0.84246
																																1622.75	0.83956
																																1622.5	0.83919
																																1622.25	0.84188
																																1622	0.84491
																																1621.75	0.8464
																																1621.5	0.84648
																																1621.25	0.84643
																																1621	0.84759
																																1620.75	0.8497
																																1620.5	0.8516
																																1620.25	0.85272
																																1620	0.85317
																																1619.75	0.85384
																																1619.5	0.85551
																																1619.25	0.85749
																																1619	0.85856
																																1618.75	0.85848
																																1618.5	0.85757
																																1618.25	0.8567
																																1618	0.85639
																																1617.75	0.85532
																																1617.5	0.85268
																																1617.25	0.85082
																																1617	0.85281
																																1616.75	0.8594
																																1616.5	0.86877
																																1616.25	0.87206
																																1616	0.8633
																																1615.75	0.85774
																																1615.5	0.8583
																																1615.25	0.85872
																																1615	0.85871
																																1614.75	0.86001
																																1614.5	0.86239
																																1614.25	0.86479
																																1614	0.86672
																																1613.75	0.86811
																																1613.5	0.8695
																																1613.25	0.8714
																																1613	0.87304
																																1612.75	0.87351
																																1612.5	0.87376
																																1612.25	0.875
																																1612	0.87657
																																1611.75	0.87752
																																1611.5	0.87831
																																1611.25	0.87945
																																1611	0.88044
																																1610.75	0.88085
																																1610.5	0.88116
																																1610.25	0.88145
																																1610	0.88053
																																1609.75	0.87828
																																1609.5	0.87672
																																1609.25	0.87786
																																1609	0.88134
																																1608.75	0.88414
																																1608.5	0.8847
																																1608.25	0.8841
																																1608	0.88421
																																1607.75	0.88459
																																1607.5	0.88346
																																1607.25	0.88126
																																1607	0.8804
																																1606.75	0.88188
																																1606.5	0.88442
																																1606.25	0.88687
																																1606	0.88879
																																1605.75	0.88988
																																1605.5	0.89016
																																1605.25	0.89023
																																1605	0.89064
																																1604.75	0.89136
																																1604.5	0.89213
																																1604.25	0.89316
																																1604	0.89427
																																1603.75	0.89472
																																1603.5	0.89418
																																1603.25	0.89285
																																1603	0.8918
																																1602.75	0.89313
																																1602.5	0.89603
																																1602.25	0.89614
																																1602	0.89393
																																1601.75	0.89416
																																1601.5	0.89705
																																1601.25	0.89849
																																1601	0.89763
																																1600.75	0.8972
																																1600.5	0.89806
																																1600.25	0.89926
																																1600	0.90017
																																1599.75	0.90046
																																1599.5	0.9008
																																1599.25	0.90193
																																1599	0.90314
																																1598.75	0.90341
																																1598.5	0.90312
																																1598.25	0.90304
																																1598	0.90314
																																1597.75	0.9033
																																1597.5	0.90418
																																1597.25	0.90575
																																1597	0.90637
																																1596.75	0.90517
																																1596.5	0.90357
																																1596.25	0.90275
																																1596	0.90251
																																1595.75	0.90264
																																1595.5	0.90353
																																1595.25	0.90436
																																1595	0.90353
																																1594.75	0.90158
																																1594.5	0.90099
																																1594.25	0.9025
																																1594	0.90403
																																1593.75	0.9047
																																1593.5	0.90541
																																1593.25	0.90639
																																1593	0.90737
																																1592.75	0.9079
																																1592.5	0.90772
																																1592.25	0.90747
																																1592	0.90788
																																1591.75	0.90849
																																1591.5	0.90871
																																1591.25	0.9087
																																1591	0.90892
																																1590.75	0.90988
																																1590.5	0.91144
																																1590.25	0.91197
																																1590	0.91076
																																1589.75	0.90975
																																1589.5	0.9104
																																1589.25	0.91184
																																1589	0.91273
																																1588.75	0.91248
																																1588.5	0.91179
																																1588.25	0.91232
																																1588	0.914
																																1587.75	0.9151
																																1587.5	0.91518
																																1587.25	0.91517
																																1587	0.91546
																																1586.75	0.91601
																																1586.5	0.91665
																																1586.25	0.91719
																																1586	0.91774
																																1585.75	0.91849
																																1585.5	0.91887
																																1585.25	0.91837
																																1585	0.91758
																																1584.75	0.91735
																																1584.5	0.91777
																																1584.25	0.91848
																																1584	0.9193
																																1583.75	0.91985
																																1583.5	0.91924
																																1583.25	0.91759
																																1583	0.91713
																																1582.75	0.91876
																																1582.5	0.92045
																																1582.25	0.92074
																																1582	0.92024
																																1581.75	0.91981
																																1581.5	0.91995
																																1581.25	0.92023
																																1581	0.91947
																																1580.75	0.91856
																																1580.5	0.91973
																																1580.25	0.92156
																																1580	0.92065
																																1579.75	0.91876
																																1579.5	0.91978
																																1579.25	0.92201
																																1579	0.92171
																																1578.75	0.9202
																																1578.5	0.92016
																																1578.25	0.92067
																																1578	0.91989
																																1577.75	0.91792
																																1577.5	0.91527
																																1577.25	0.91175
																																1577	0.90767
																																1576.75	0.90365
																																1576.5	0.90037
																																1576.25	0.90133
																																1576	0.91157
																																1575.75	0.92298
																																1575.5	0.91707
																																1575.25	0.90725
																																1575	0.90543
																																1574.75	0.90758
																																1574.5	0.9103
																																1574.25	0.91174
																																1574	0.91307
																																1573.75	0.91632
																																1573.5	0.91932
																																1573.25	0.9189
																																1573	0.9173
																																1572.75	0.9185
																																1572.5	0.92153
																																1572.25	0.92339
																																1572	0.92307
																																1571.75	0.92111
																																1571.5	0.91989
																																1571.25	0.9211
																																1571	0.92214
																																1570.75	0.92028
																																1570.5	0.917
																																1570.25	0.91434
																																1570	0.91267
																																1569.75	0.91207
																																1569.5	0.9119
																																1569.25	0.91086
																																1569	0.91001
																																1568.75	0.9109
																																1568.5	0.91229
																																1568.25	0.91333
																																1568	0.91489
																																1567.75	0.91649
																																1567.5	0.91706
																																1567.25	0.91739
																																1567	0.91899
																																1566.75	0.92122
																																1566.5	0.92236
																																1566.25	0.92224
																																1566	0.92159
																																1565.75	0.92063
																																1565.5	0.91943
																																1565.25	0.9182
																																1565	0.91689
																																1564.75	0.91568
																																1564.5	0.91569
																																1564.25	0.91684
																																1564	0.91782
																																1563.75	0.91799
																																1563.5	0.91755
																																1563.25	0.91764
																																1563	0.91862
																																1562.75	0.91898
																																1562.5	0.91811
																																1562.25	0.91742
																																1562	0.91748
																																1561.75	0.91716
																																1561.5	0.91569
																																1561.25	0.91316
																																1561	0.91019
																																1560.75	0.90764
																																1560.5	0.90661
																																1560.25	0.90874
																																1560	0.91458
																																1559.75	0.92064
																																1559.5	0.91676
																																1559.25	0.89422
																																1559	0.87306
																																1558.75	0.87912
																																1558.5	0.90933
																																1558.25	0.90351
																																1558	0.86718
																																1557.75	0.90039
																																1557.5	1.1163
																																1557.25	1.0035
																																1557	0.90863
																																1556.75	0.90156
																																1556.5	0.90011
																																1556.25	0.89934
																																1556	0.89993
																																1555.75	0.90153
																																1555.5	0.90258
																																1555.25	0.90244
																																1555	0.90153
																																1554.75	0.90056
																																1554.5	0.90084
																																1554.25	0.90343
																																1554	0.90624
																																1553.75	0.90614
																																1553.5	0.90602
																																1553.25	0.90716
																																1553	0.90892
																																1552.75	0.9105
																																1552.5	0.91137
																																1552.25	0.91183
																																1552	0.91251
																																1551.75	0.91357
																																1551.5	0.91485
																																1551.25	0.91563
																																1551	0.91529
																																1550.75	0.91398
																																1550.5	0.91192
																																1550.25	0.90947
																																1550	0.90724
																																1549.75	0.90559
																																1549.5	0.90535
																																1549.25	0.90799
																																1549	0.91112
																																1548.75	0.91203
																																1548.5	0.9114
																																1548.25	0.911
																																1548	0.91171
																																1547.75	0.91355
																																1547.5	0.91573
																																1547.25	0.91702
																																1547	0.91724
																																1546.75	0.91717
																																1546.5	0.91629
																																1546.25	0.91368
																																1546	0.9106
																																1545.75	0.90905
																																1545.5	0.90941
																																1545.25	0.91083
																																1545	0.91132
																																1544.75	0.90753
																																1544.5	0.90026
																																1544.25	0.8958
																																1544	0.89463
																																1543.75	0.89464
																																1543.5	0.89417
																																1543.25	0.89181
																																1543	0.88784
																																1542.75	0.88472
																																1542.5	0.88265
																																1542.25	0.88092
																																1542	0.88406
																																1541.75	0.897
																																1541.5	0.9026
																																1541.25	0.89581
																																1541	0.88687
																																1540.75	0.88008
																																1540.5	0.87581
																																1540.25	0.87313
																																1540	0.87097
																																1539.75	0.86624
																																1539.5	0.85156
																																1539.25	0.82549
																																1539	0.82988
																																1538.75	0.8591
																																1538.5	0.86725
																																1538.25	0.88223
																																1538	0.89579
																																1537.75	0.89944
																																1537.5	0.9015
																																1537.25	0.90344
																																1537	0.9055
																																1536.75	0.9075
																																1536.5	0.90928
																																1536.25	0.91098
																																1536	0.91223
																																1535.75	0.91202
																																1535.5	0.91005
																																1535.25	0.90776
																																1535	0.9068
																																1534.75	0.90673
																																1534.5	0.90644
																																1534.25	0.90485
																																1534	0.90222
																																1533.75	0.90234
																																1533.5	0.90687
																																1533.25	0.90702
																																1533	0.89928
																																1532.75	0.89961
																																1532.5	0.90418
																																1532.25	0.90505
																																1532	0.90408
																																1531.75	0.90283
																																1531.5	0.90226
																																1531.25	0.90399
																																1531	0.90781
																																1530.75	0.91236
																																1530.5	0.91499
																																1530.25	0.9145
																																1530	0.91409
																																1529.75	0.91567
																																1529.5	0.91653
																																1529.25	0.91482
																																1529	0.91269
																																1528.75	0.91162
																																1528.5	0.91136
																																1528.25	0.91118
																																1528	0.91014
																																1527.75	0.90831
																																1527.5	0.90622
																																1527.25	0.90352
																																1527	0.90105
																																1526.75	0.90163
																																1526.5	0.90429
																																1526.25	0.9059
																																1526	0.90437
																																1525.75	0.90073
																																1525.5	0.89851
																																1525.25	0.89843
																																1525	0.89699
																																1524.75	0.89702
																																1524.5	0.90156
																																1524.25	0.90477
																																1524	0.90491
																																1523.75	0.90304
																																1523.5	0.9002
																																1523.25	0.89761
																																1523	0.89623
																																1522.75	0.89512
																																1522.5	0.89252
																																1522.25	0.88955
																																1522	0.88942
																																1521.75	0.88867
																																1521.5	0.88528
																																1521.25	0.8839
																																1521	0.88952
																																1520.75	0.88546
																																1520.5	0.87241
																																1520.25	0.87016
																																1520	0.88321
																																1519.75	0.88743
																																1519.5	0.8884
																																1519.25	0.89571
																																1519	0.90259
																																1518.75	0.90429
																																1518.5	0.9031
																																1518.25	0.90218
																																1518	0.90142
																																1517.75	0.89967
																																1517.5	0.89744
																																1517.25	0.8973
																																1517	0.8995
																																1516.75	0.90085
																																1516.5	0.89805
																																1516.25	0.89006
																																1516	0.88635
																																1515.75	0.88912
																																1515.5	0.89205
																																1515.25	0.89404
																																1515	0.89366
																																1514.75	0.89153
																																1514.5	0.89432
																																1514.25	0.90073
																																1514	0.90502
																																1513.75	0.90705
																																1513.5	0.90764
																																1513.25	0.90705
																																1513	0.90545
																																1512.75	0.90367
																																1512.5	0.90261
																																1512.25	0.90262
																																1512	0.90341
																																1511.75	0.90413
																																1511.5	0.90399
																																1511.25	0.90336
																																1511	0.90248
																																1510.75	0.90042
																																1510.5	0.89681
																																1510.25	0.89331
																																1510	0.89143
																																1509.75	0.89163
																																1509.5	0.89333
																																1509.25	0.8934
																																1509	0.89043
																																1508.75	0.88797
																																1508.5	0.8866
																																1508.25	0.88225
																																1508	0.87333
																																1507.75	0.86445
																																1507.5	0.85649
																																1507.25	0.85707
																																1507	0.87374
																																1506.75	0.88976
																																1506.5	0.8779
																																1506.25	0.85188
																																1506	0.84715
																																1505.75	0.85495
																																1505.5	0.88191
																																1505.25	0.87992
																																1505	0.8664
																																1504.75	0.87227
																																1504.5	0.87998
																																1504.25	0.88689
																																1504	0.8911
																																1503.75	0.89217
																																1503.5	0.89261
																																1503.25	0.89417
																																1503	0.89603
																																1502.75	0.89714
																																1502.5	0.89719
[truncated: 405 more rows]

## Sheet: Figure 4
AGGREGATION OF PEPTIDES
	Initial measurements of ThT fluorescence								Final measurements of ThT fluorescence
peptide	1 repeat	2 repeat	3 repeat		mean	stdev		peptide	1 repeat	2 repeat	3 repeat		mean	stdv
CS-1	8	7	8		7.66667	0.57735		CS-1	102	86	111		99.6667	12.6623
CS-2	11	8	10		9.66667	1.52753		CS-2	88	121	79		96	22.1133
CS-3	8	10	11		9.66667	1.52753		CS-3	756	602	798		718.667	103.196
β1	9	11	11		10.3333	1.1547		β1	96	75	109		93.3333	17.1561
β2	8	12	9		9.66667	2.08167		β2	111	101	92		101.333	9.50438
β3	11	8	11		10	1.73205		β3	2265	2426	2301		2330.67	84.5005
β4	10	7	8		8.33333	1.52753		β4	77	109	92		92.6667	16.0104
β5	9	9	7		8.33333	1.1547		β5	105	89	91		95	8.7178
β6	8	10	8		8.66667	1.1547		β6	1033	1269	1154		1152	118.013
β7	8	11	8		9	1.73205		β7	1314	1459	1368		1380.33	73.2826
β8	10	8	9		9	1		β8	117	85	107		103	16.3707
ABSORBANCE SPECTRA FROM 400 NM TO 650 NM (CONGO RED BIRREGRINGENCE ASSAY)
Wavelength:	400	401	402	403	404	405	406	407	408	409	410	411	412	413	414	415	416	417	418	419	420	421	422	423	424	425	426	427	428	429	430	431	432	433	434	435	436	437	438	439	440	441	442	443	444	445	446	447	448
CS-1	0.2265	0.2287	0.2299	0.2305	0.2313	0.2332	0.2345	0.2351	0.2379	0.2392	0.2412	0.2439	0.2461	0.2485	0.2512	0.2543	0.257	0.2592	0.2618	0.2642	0.2658	0.2687	0.2712	0.2737	0.2766	0.2789	0.2819	0.2854	0.2885	0.2919	0.2947	0.2986	0.301	0.3046	0.3069	0.3104	0.3129	0.3155	0.3186	0.3215	0.3247	0.3278	0.3301	0.3329	0.3355	0.3384	0.3404	0.3435	0.3461
CS-2	0.2489	0.2495	0.25	0.2497	0.251	0.2525	0.2537	0.2541	0.2566	0.2577	0.2602	0.2623	0.2647	0.2675	0.2702	0.273	0.2763	0.2787	0.2816	0.2838	0.286	0.2881	0.2905	0.2934	0.2964	0.2984	0.302	0.3051	0.3083	0.3119	0.3152	0.3191	0.3208	0.3249	0.3276	0.3311	0.3342	0.3362	0.3391	0.3428	0.3457	0.3489	0.3512	0.3537	0.3565	0.3595	0.3624	0.3651	0.3672
CS-3	0.2311	0.2333	0.2329	0.2324	0.2335	0.2343	0.236	0.2361	0.2392	0.2404	0.2418	0.2447	0.2472	0.2497	0.2524	0.2556	0.2588	0.2613	0.2641	0.2671	0.2697	0.2726	0.2753	0.2784	0.2821	0.2851	0.2894	0.2927	0.2965	0.3003	0.304	0.3083	0.3109	0.315	0.3186	0.3225	0.326	0.3296	0.3331	0.3366	0.3406	0.3441	0.3473	0.3505	0.3543	0.3577	0.3608	0.3644	0.3676
β1	0.246	0.2469	0.2473	0.2479	0.2493	0.25	0.2524	0.2529	0.2551	0.2573	0.259	0.2619	0.2645	0.2673	0.2702	0.2733	0.2762	0.279	0.282	0.2848	0.2869	0.2896	0.2918	0.295	0.2982	0.3008	0.3042	0.3077	0.3113	0.3148	0.3181	0.3226	0.325	0.3285	0.3316	0.3351	0.3382	0.341	0.3442	0.3477	0.3512	0.3543	0.3564	0.3591	0.3622	0.3652	0.3682	0.3711	0.3742
β2	0.22865	0.23065	0.2316	0.23205	0.2331	0.2344	0.23585	0.23675	0.2395	0.24075	0.2426	0.2453	0.24805	0.2506	0.25335	0.2563	0.25885	0.26195	0.2646	0.2673	0.26925	0.272	0.27435	0.2775	0.28075	0.283	0.2864	0.2897	0.29345	0.29725	0.3003	0.3039	0.30635	0.30985	0.3127	0.31655	0.31915	0.3219	0.3249	0.32805	0.3312	0.3345	0.3368	0.3395	0.3423	0.3451	0.3476	0.3506	0.3534
β3	0.239	0.2394	0.2389	0.2383	0.2386	0.2382	0.2389	0.2386	0.2399	0.2398	0.241	0.2417	0.2435	0.2449	0.2464	0.2481	0.2503	0.252	0.2539	0.2561	0.2574	0.2589	0.2609	0.2632	0.2653	0.2675	0.2698	0.2727	0.2754	0.2789	0.2814	0.2852	0.2869	0.2904	0.293	0.2963	0.2986	0.3017	0.3046	0.3073	0.3106	0.3139	0.316	0.3188	0.3221	0.3251	0.328	0.3309	0.3343
β4	0.2722	0.2733	0.2743	0.2745	0.2758	0.2768	0.2785	0.2791	0.282	0.2832	0.285	0.2879	0.291	0.2937	0.2964	0.2996	0.3022	0.3052	0.3082	0.3113	0.3131	0.3157	0.3188	0.3218	0.325	0.3277	0.3312	0.3346	0.338	0.3418	0.3449	0.3488	0.3513	0.3549	0.3584	0.3616	0.3646	0.3676	0.3705	0.3741	0.3775	0.3803	0.3829	0.3858	0.3889	0.392	0.3944	0.3975	0.4007
β5	0.2035	0.2056	0.2068	0.2075	0.2089	0.2097	0.2118	0.2127	0.2152	0.2167	0.2185	0.2211	0.2238	0.2265	0.2293	0.2323	0.235	0.238	0.2412	0.2436	0.2453	0.2482	0.2506	0.2532	0.2564	0.2591	0.262	0.2656	0.2692	0.2726	0.2759	0.2798	0.2822	0.2861	0.2888	0.2926	0.2954	0.298	0.3011	0.3042	0.3074	0.3107	0.313	0.316	0.3188	0.3219	0.3245	0.3274	0.3298
β6	0.1849	0.1855	0.184	0.1833	0.1836	0.1839	0.1842	0.184	0.186	0.1859	0.1872	0.1889	0.1899	0.1919	0.1937	0.1959	0.1977	0.1989	0.2014	0.2032	0.2038	0.2054	0.2074	0.2092	0.2113	0.2129	0.2152	0.2175	0.2196	0.2221	0.2246	0.2271	0.2292	0.2319	0.234	0.2367	0.2387	0.2402	0.2427	0.2452	0.2479	0.2504	0.2519	0.2535	0.2559	0.2582	0.2604	0.2623	0.2642
β7	0.2349	0.2555	0.254	0.2533	0.2536	0.2539	0.2542	0.254	0.256	0.2559	0.2572	0.2589	0.2599	0.2619	0.2637	0.2659	0.2677	0.2689	0.2714	0.2732	0.2738	0.2754	0.2774	0.2792	0.2813	0.2829	0.2852	0.2875	0.2896	0.2921	0.2946	0.2971	0.2992	0.3019	0.304	0.3067	0.3087	0.3102	0.3127	0.3152	0.3179	0.3204	0.3219	0.3235	0.3259	0.3282	0.3304	0.3323	0.3342
β8	0.2996	0.3009	0.3021	0.3021	0.3031	0.3041	0.3058	0.3061	0.3089	0.3101	0.3126	0.3144	0.3174	0.3196	0.3219	0.3247	0.3275	0.3293	0.3326	0.3354	0.337	0.3395	0.342	0.3454	0.3479	0.3506	0.3537	0.3568	0.3602	0.3635	0.3663	0.3697	0.3724	0.3751	0.3783	0.3817	0.3841	0.3868	0.3898	0.3928	0.396	0.3987	0.4009	0.4032	0.4062	0.4091	0.4116	0.4138	0.4166
Congo red alone	0.2508	0.2519	0.2529	0.2531	0.2544	0.2554	0.2571	0.2577	0.2606	0.2618	0.2636	0.2665	0.2696	0.2723	0.275	0.2782	0.2808	0.2838	0.2868	0.2899	0.2917	0.2943	0.2974	0.3004	0.3036	0.3063	0.3098	0.3132	0.3166	0.3204	0.3235	0.3274	0.3299	0.3335	0.337	0.3402	0.3432	0.3462	0.3491	0.3527	0.3561	0.3589	0.3615	0.3644	0.3675	0.3706	0.373	0.3761	0.3793
[truncated: 205 more columns]

## Sheet: Figure 6
AGGREGATION KINECTS (HIDROLYZED FRAGMENTS OF HsTPI)
	Time (hrs)	HEWL
		ThT fluorescence
		1 repeat	2 repeat	3 repeat	mean	stdev
	0	12	13	16	13.6667	2.08167
	5	34	33	42	36.3333	4.93288
	12	46	60	58	54.6667	7.57188
	24	89	99	109	99	10
	48	125	86	156	122.333	35.0761
	72	456	785	367	536	220.184
	96	1293	1198	1229	1240	48.4458
	120	2168	2256	2309	2244.33	71.2203
	144	2236	2569	2348	2384.33	169.447
	168	2564	2351	2015	2310	276.787

## Sheet: Figure S2
	Urea [M] →	0	0.8	1.6	2.4	3.2	4	4.8	5.6	6.4	7.2	8
	ThT Fluorescence
Repeat 1	351	395	1215	2839	2917	3826	3230	1889	1140	1456	1212	900
Repeat 2	363	670	1543	2855	2920	3752	3397	1712	1118	1188	1633	871
Repeat 3	311	496	1363	2727	3390	3904	3193	2088	1521	1237	1642	1053
mean	341.667	520.333	1373.67	2807	3075.67	3827.33	3273.33	1896.33	1259.67	1293.67	1495.67	941.333
stdev	27.2274	139.105	164.26	69.7424	272.225	76.0088	108.685	188.107	226.588	142.704	245.704	97.7872
